# Supplementary material for: Prediction of two-photon absorption enhancement in red fluorescent protein chromophores made from non-canonical amino acids
Source: Royal Society of Chemistry journal article supplement (doi:10.1039/c6cp03865d), 2016-01-01
Supplement: c6cp03865d1.pdf [file c6cp03865d1.pdf]

# Electronic Supplementary Information for “Prediction of two-photon absorption enhancement in red fluorescent protein chromophores made from non-canonical amino acids”

M. Alaraby Salem<sup>a</sup>, Isaac Twelves<sup>a</sup> and Alex Brown<sup>a\*</sup>

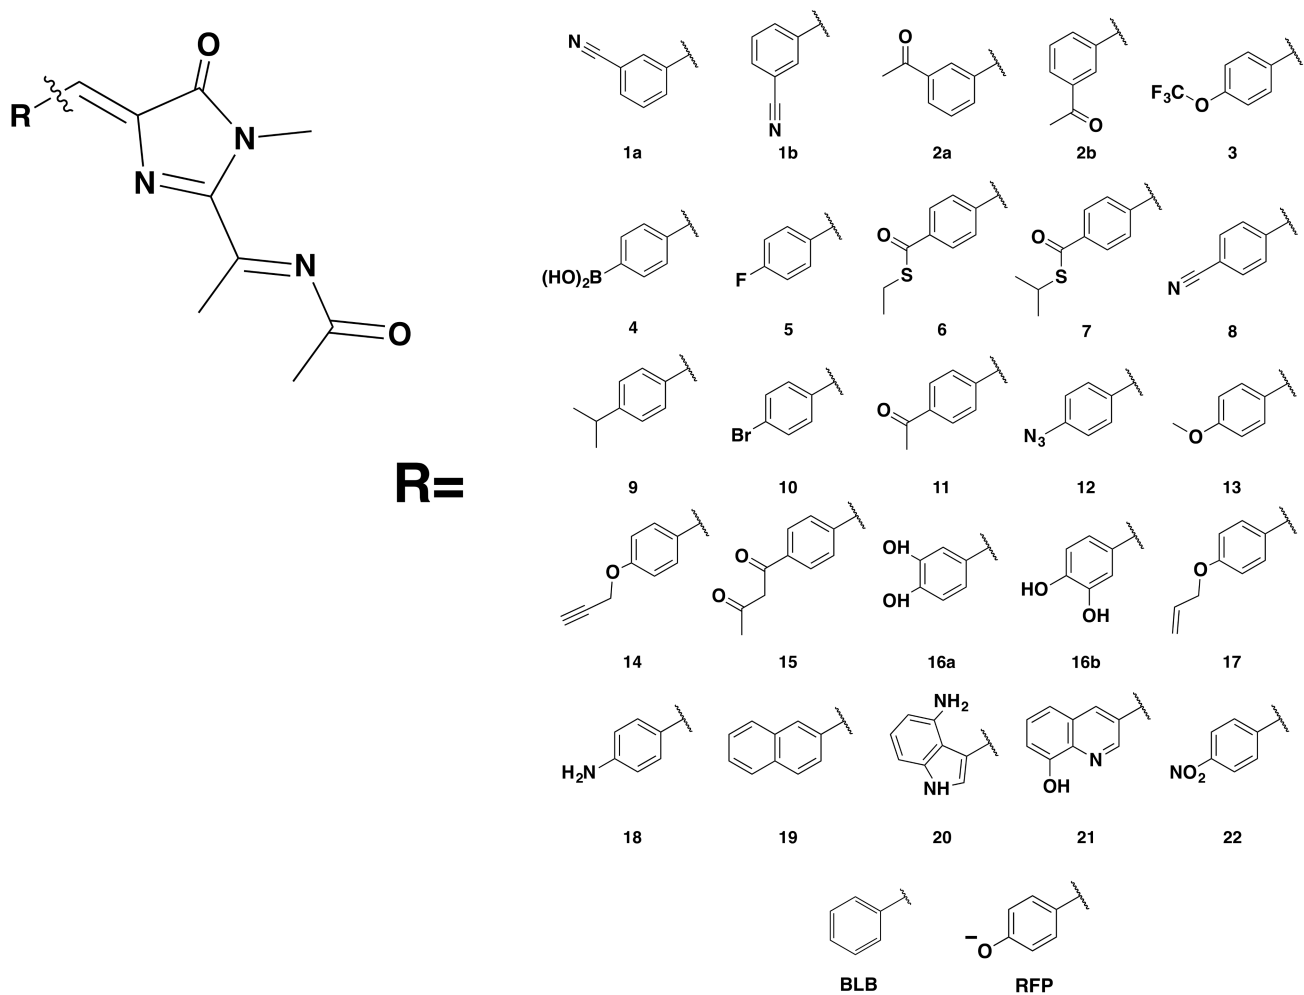

**Fig. S1** Chromophore models built from the RFP-parent structure. RFP and BLB refer to the DsRed and mBlueberry chromophore models, respectively. The rest are built via the replacement of the phenol ring of Tyr-66 with the corresponding moiety in a non-canonical amino acid. The numbering matches the corresponding previously studies models.<sup>1</sup>

<sup>a</sup>Department of Chemistry, University of Alberta, Edmonton, Alberta T6G 2G2 Canada. Fax: 780-492-8231; Tel: 780-492-1854; E-mail: alex.brown@ualberta.ca

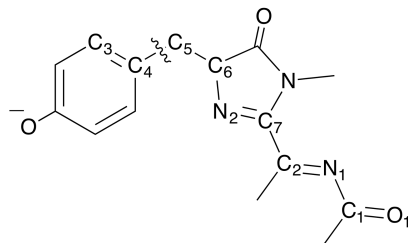

| Protein Name (PDB ID)           | Tilt Angle (in degree)<br>(C <sub>4</sub> - C <sub>5</sub> - C <sub>6</sub> - N <sub>2</sub> ) | Twist Angle (in degree)<br>(C <sub>3</sub> - C <sub>4</sub> - C <sub>5</sub> - C <sub>6</sub> ) | $\theta_{\text{acylimine}}$ (in degree)<br>(O <sub>1</sub> - C <sub>1</sub> - N <sub>1</sub> - C <sub>2</sub> ) | $\theta_1$ (in degree)<br>(C <sub>1</sub> - N <sub>1</sub> - C <sub>2</sub> - C <sub>7</sub> ) | $\theta_2$ (in degree)<br>(N <sub>1</sub> - C <sub>2</sub> - C <sub>7</sub> - N <sub>2</sub> ) |
|---------------------------------|------------------------------------------------------------------------------------------------|-------------------------------------------------------------------------------------------------|-----------------------------------------------------------------------------------------------------------------|------------------------------------------------------------------------------------------------|------------------------------------------------------------------------------------------------|
| FP583 (1GGX)                    | 2                                                                                              | 182                                                                                             | 145.6                                                                                                           | 114.5                                                                                          | 191.5                                                                                          |
| DsRED (1G7K)                    | 0.03                                                                                           | 181.8                                                                                           | 176.4                                                                                                           | 91.3                                                                                           | 183.5                                                                                          |
| K83M (2H8Q)                     | -3.4                                                                                           | 186.9                                                                                           | 181.4                                                                                                           | 104.6                                                                                          | 164.8                                                                                          |
| Rtms5 H146S (2P4M)              | -2                                                                                             | 212.6                                                                                           | 133.5                                                                                                           | 111.9                                                                                          | 178.0                                                                                          |
| DsRED.M1(2VAD)                  | 7.4                                                                                            | 180                                                                                             | 210.7                                                                                                           | 110.2                                                                                          | 175.8                                                                                          |
| KillerRed (2W1Q)                | 27.9                                                                                           | 168.2                                                                                           | 37.5                                                                                                            | 204.1                                                                                          | 229.8                                                                                          |
| mKeima(pH=8) (2WHU)             | -19.4                                                                                          | 217.4                                                                                           | 121.2                                                                                                           | 139.1                                                                                          | 180.8                                                                                          |
| mKeima(pH=3.8) (2WHS)           | -1.3                                                                                           | 179.4                                                                                           | 144.4                                                                                                           | 116.4                                                                                          | 180.2                                                                                          |
| MKEIMA(pH=7)-3IR8               | 1.3                                                                                            | 173.2                                                                                           | 168.6                                                                                                           | 108.2                                                                                          | 173.1                                                                                          |
| KillerRed (3A8S)                | 28.4                                                                                           | 156.4                                                                                           | 30.2                                                                                                            | 181.6                                                                                          | 252.5                                                                                          |
| KillerRed (3GB3)                | 24.8                                                                                           | 164.3                                                                                           | 45.2                                                                                                            | 197.1                                                                                          | 222.5                                                                                          |
| Azami-Green (3ADF)              | 31                                                                                             | 152.6                                                                                           | 15.7                                                                                                            | 228.4                                                                                          | 249.5                                                                                          |
| SuperNova (3WCK)                | 3.9                                                                                            | 172.5                                                                                           | 44.6                                                                                                            | 184.7                                                                                          | 224.8                                                                                          |
| Favina Proteins Ancestor (4DXI) | 2.6                                                                                            | 178.7                                                                                           | 349.6                                                                                                           | 240.8                                                                                          | 253.0                                                                                          |
| eCGP123 (4TZG)                  | 7.9                                                                                            | 167.4                                                                                           | 358.9                                                                                                           | 249.4                                                                                          | 235.5                                                                                          |
| Blue Chromoprotein sgBP (4ZB1)  | -10.2                                                                                          | 220.6                                                                                           | 52.7                                                                                                            | 199.9                                                                                          | 218.4                                                                                          |
| mPlum (2QLG)                    | -3.2                                                                                           | 185.8                                                                                           | 3.5                                                                                                             | 222.1                                                                                          | 256.1                                                                                          |
| mCHERRY (2H5Q)                  | 26.2                                                                                           | 164.3                                                                                           | 119.7                                                                                                           | 140.4                                                                                          | 179.1                                                                                          |
| TagBFP (3M24)                   | 5.2                                                                                            | 178.8                                                                                           | 168.4                                                                                                           | 133.8                                                                                          | 177.2                                                                                          |
| Neptune (3IP2)                  | 27.9                                                                                           | 168.2                                                                                           | 37.5                                                                                                            | 284.3                                                                                          | 229.8                                                                                          |
| EQFP650 (4EDO)                  | 5.2                                                                                            | 178.8                                                                                           | 168.4                                                                                                           | 133.8                                                                                          | 177.2                                                                                          |
| Average                         | 7.7                                                                                            | 179.5                                                                                           | 129.2                                                                                                           | 166.5                                                                                          | 206.3                                                                                          |

**Table S1** Tilt, twist and acylimine ( $\theta_{\text{acylimine}}$ ) dihedral angles for red fluorescent chromophores in their native protein crystal structures. Also included are the two other dihedral angles ( $\theta_1$  and  $\theta_2$ ) defining the geometry of the extended conjugation chain.

**Table S2** Coordinates of the optimized models at the PBE0/6-31+G(d,p) level of theory in the gas phase. All chromophores are capped with methyl groups (see Figure S1) except where noted.

| Coordinates for BLB Model |          |          |          |
|---------------------------|----------|----------|----------|
| C                         | -5.40977 | 0.15799  | 0.05968  |
| C                         | -4.31665 | 0.97182  | 0.04862  |
| C                         | -5.28268 | -1.29241 | 0.04480  |
| C                         | -3.91326 | -1.79368 | 0.01531  |
| C                         | -2.97609 | 0.46139  | 0.01704  |
| C                         | -2.82982 | -0.96666 | 0.00656  |
| C                         | -1.91112 | 1.36417  | 0.00275  |
| C                         | -0.52636 | 1.17007  | -0.02172 |
| C                         | 1.44199  | 0.28769  | -0.03840 |
| C                         | 0.41421  | 2.28938  | -0.02118 |
| C                         | 2.46489  | -0.73065 | -0.05701 |
| C                         | 4.75710  | -1.28481 | -0.05084 |
| C                         | 1.98998  | -2.15043 | -0.21078 |
| C                         | 5.61207  | -1.40930 | 1.19122  |
| C                         | 2.89133  | 2.40652  | -0.06476 |
| N                         | 0.15647  | -0.01265 | -0.02929 |
| N                         | 1.65951  | 1.65890  | -0.03568 |
| N                         | 3.70984  | -0.40288 | 0.08555  |
| H                         | -6.27139 | -2.05291 | 0.06118  |
| H                         | -6.41872 | 0.56307  | 0.06585  |
| H                         | -4.44864 | 2.05380  | 0.04444  |
| H                         | -3.79286 | -2.87505 | 0.00942  |
| H                         | -1.82169 | -1.37362 | -0.01024 |
| H                         | -2.17809 | 2.42210  | 0.01818  |
| H                         | 1.05738  | -2.29372 | 0.33679  |
| H                         | 1.78473  | -2.36344 | -1.26435 |
| H                         | 2.75272  | -2.85485 | 0.12453  |
| H                         | 5.01525  | -1.82646 | 2.01032  |
| H                         | 6.45912  | -2.06780 | 0.98887  |
| H                         | 5.96338  | -0.42665 | 1.51645  |
| H                         | 3.49391  | 2.23148  | 0.82853  |
| H                         | 3.48910  | 2.13282  | -0.93934 |
| H                         | 2.60194  | 3.45933  | -0.12559 |
| O                         | 0.24183  | 3.51189  | -0.01863 |
| O                         | 5.03740  | -1.85747 | -1.09128 |
| Coordinates for RFP model |          |          |          |
| C                         | -5.40977 | 0.15799  | 0.05968  |
| C                         | -4.31665 | 0.97182  | 0.04862  |
| C                         | -5.28268 | -1.29241 | 0.04480  |
| C                         | -3.91326 | -1.79368 | 0.01531  |
| C                         | -2.97609 | 0.46139  | 0.01704  |
| C                         | -2.82982 | -0.96666 | 0.00656  |
| C                         | -1.91112 | 1.36417  | 0.00275  |
| C                         | -0.52636 | 1.17007  | -0.02172 |
| N                         | 0.15647  | -0.01265 | -0.02929 |
| C                         | 1.44199  | 0.28769  | -0.03840 |
| C                         | 0.41422  | 2.28938  | -0.02118 |
| N                         | 1.65951  | 1.65890  | -0.03568 |
| O                         | -6.27139 | -2.05291 | 0.06118  |
| O                         | 0.24183  | 3.51189  | -0.01863 |
| H                         | -6.41872 | 0.56307  | 0.06585  |
| H                         | -4.44864 | 2.05380  | 0.04444  |
| H                         | -3.79286 | -2.87505 | 0.00942  |
| H                         | -1.82169 | -1.37362 | -0.01024 |
| H                         | -2.17809 | 2.42210  | 0.01818  |
| C                         | 2.46489  | -0.73065 | -0.05701 |
| N                         | 3.70984  | -0.40288 | 0.08555  |
| C                         | 4.75710  | -1.28481 | -0.05084 |
| O                         | 5.03740  | -1.85747 | -1.09128 |
| C                         | 1.98998  | -2.15043 | -0.21078 |

|                                          |          |          |          |
|------------------------------------------|----------|----------|----------|
| H                                        | 1.05738  | -2.29372 | 0.33679  |
| H                                        | 1.78473  | -2.36344 | -1.26435 |
| Coordinates for RFP model with H-capping |          |          |          |
| C                                        | 4.72554  | 0.26170  | 0.06860  |
| C                                        | 3.60206  | 1.03307  | 0.08040  |
| C                                        | 4.65429  | -1.19095 | -0.00045 |
| C                                        | 3.30520  | -1.74290 | -0.05274 |
| C                                        | 2.28205  | 0.47291  | 0.03084  |
| C                                        | 2.19095  | -0.95790 | -0.04215 |
| C                                        | 1.18311  | 1.33387  | 0.05182  |
| C                                        | -0.19303 | 1.08811  | 0.01061  |
| C                                        | -2.12492 | 0.13468  | -0.09900 |
| C                                        | -1.17559 | 2.17051  | 0.03351  |
| C                                        | -3.10755 | -0.91989 | -0.17647 |
| C                                        | -5.37470 | -1.55642 | -0.30392 |
| N                                        | -0.82930 | -0.11739 | -0.07329 |
| N                                        | -2.39517 | 1.49501  | -0.03583 |
| N                                        | -4.35801 | -0.63049 | -0.35040 |
| H                                        | 5.71755  | 0.70318  | 0.12460  |
| H                                        | 3.69175  | 2.11723  | 0.14864  |
| H                                        | 3.22668  | -2.82659 | -0.11044 |
| H                                        | 1.19945  | -1.40181 | -0.08760 |
| H                                        | 1.40926  | 2.40008  | 0.10455  |
| H                                        | -2.72537 | -1.94774 | -0.10702 |
| H                                        | -5.96769 | -1.62015 | -1.25026 |
| H                                        | -3.27727 | 1.98448  | -0.02137 |
| O                                        | 5.67166  | -1.91263 | -0.01882 |
| O                                        | -1.05076 | 3.39675  | 0.10428  |
| O                                        | -5.67160 | -2.19616 | 0.69188  |
| Coordinates for Model Number 1a          |          |          |          |
| C                                        | -3.39536 | -2.24899 | 0.00832  |
| C                                        | -2.38476 | -1.29604 | 0.00383  |
| C                                        | -2.69784 | 0.07763  | 0.01984  |
| C                                        | -1.69458 | 1.12506  | 0.01365  |
| C                                        | -4.04789 | 0.45939  | 0.03967  |
| C                                        | -5.05922 | -0.50410 | 0.04348  |
| C                                        | -4.73367 | -1.86726 | 0.02798  |
| C                                        | 0.54156  | 2.21786  | -0.02553 |
| C                                        | 1.67851  | 0.29258  | -0.05799 |
| C                                        | -0.34308 | 1.02125  | -0.00984 |
| C                                        | 3.01021  | 2.49545  | -0.12976 |
| C                                        | -6.43229 | -0.09646 | 0.06307  |
| C                                        | 2.79654  | -0.67344 | -0.08351 |
| C                                        | 5.12373  | -1.02576 | -0.02268 |
| C                                        | 2.41615  | -2.11169 | -0.27472 |
| C                                        | 5.90687  | -1.12135 | 1.25818  |
| N                                        | 1.82478  | 1.66619  | -0.05440 |
| N                                        | 0.44018  | -0.12246 | -0.03291 |
| N                                        | -7.54670 | 0.23112  | 0.07907  |
| N                                        | 3.98215  | -0.22171 | 0.06579  |
| H                                        | -1.34210 | -1.59223 | -0.01399 |
| H                                        | -4.31192 | 1.51275  | 0.05140  |
| H                                        | -2.06392 | 2.14989  | 0.02544  |
| H                                        | -5.52553 | -2.60920 | 0.03069  |
| H                                        | -3.14042 | -3.30428 | -0.00475 |
| H                                        | 2.00870  | -2.25115 | -1.28109 |
| H                                        | 3.27967  | -2.76704 | -0.15972 |
| H                                        | 1.62689  | -2.38803 | 0.42822  |
| H                                        | 5.27581  | -1.50218 | 2.06812  |
| H                                        | 6.76558  | -1.77696 | 1.11039  |
| H                                        | 6.24813  | -0.12530 | 1.55754  |
| H                                        | 3.63104  | 2.37615  | 0.75953  |
| H                                        | 2.65294  | 3.52534  | -0.19963 |
| H                                        | 3.60407  | 2.24485  | -1.01029 |

|                                 |          |          |          |
|---------------------------------|----------|----------|----------|
| O                               | 0.27342  | 3.40375  | -0.02222 |
| O                               | 5.48338  | -1.51150 | -1.07628 |
| Coordinates for Model Number 1b |          |          |          |
| C                               | 3.96281  | 1.34801  | 0.01766  |
| C                               | 2.81669  | 0.55193  | -0.00328 |
| C                               | 2.93512  | -0.84748 | 0.03093  |
| C                               | 1.79153  | -1.73899 | 0.01684  |
| C                               | 4.22180  | -1.41385 | 0.08487  |
| C                               | 5.35946  | -0.61522 | 0.10469  |
| C                               | 5.24045  | 0.76903  | 0.07156  |
| C                               | -0.57814 | -2.49865 | -0.02334 |
| C                               | -1.42468 | -0.42990 | -0.08356 |
| C                               | 0.46984  | -1.44205 | -0.02393 |
| C                               | -3.06143 | -2.41890 | -0.09436 |
| C                               | 3.83063  | 2.77479  | -0.01394 |
| C                               | -2.39191 | 0.68730  | -0.11730 |
| C                               | -4.65147 | 1.35995  | -0.03735 |
| C                               | -1.81032 | 2.05578  | -0.31145 |
| C                               | -5.36869 | 1.59240  | 1.26469  |
| N                               | -1.76769 | -1.76813 | -0.05878 |
| N                               | -0.13954 | -0.19779 | -0.06707 |
| N                               | 3.72564  | 3.93148  | -0.03766 |
| N                               | -3.62853 | 0.40934  | 0.03938  |
| H                               | 1.83237  | 1.00414  | -0.04439 |
| H                               | 4.32153  | -2.49577 | 0.11202  |
| H                               | 6.34326  | -1.07210 | 0.14603  |
| H                               | 2.00822  | -2.80599 | 0.04539  |
| H                               | 6.11964  | 1.40487  | 0.08712  |
| H                               | -1.26766 | 2.09711  | -1.26012 |
| H                               | -2.59110 | 2.81608  | -0.32045 |
| H                               | -1.08072 | 2.26835  | 0.47459  |
| H                               | -4.65851 | 1.85103  | 2.05717  |
| H                               | -6.10187 | 2.38941  | 1.13817  |
| H                               | -5.87450 | 0.67159  | 1.57330  |
| H                               | -3.63244 | -2.10607 | -0.97010 |
| H                               | -3.63868 | -2.18971 | 0.80265  |
| H                               | -2.85809 | -3.49104 | -0.14331 |
| O                               | -0.48445 | -3.71096 | -0.00087 |
| O                               | -4.98176 | 1.86052  | -1.09336 |
| Coordinates for Model Number 2a |          |          |          |
| C                               | -4.64457 | -0.44420 | 0.02937  |
| C                               | -3.61598 | 0.49966  | 0.03303  |
| C                               | -2.26877 | 0.11193  | 0.02470  |
| C                               | -1.25696 | 1.15034  | 0.02193  |
| C                               | -1.96407 | -1.26548 | 0.01366  |
| C                               | -2.98353 | -2.20649 | 0.01121  |
| C                               | -4.31921 | -1.80520 | 0.01841  |
| C                               | 0.99099  | 2.22340  | -0.01475 |
| C                               | 2.10962  | 0.28583  | -0.03569 |
| C                               | 0.09510  | 1.03721  | 0.00629  |
| C                               | 3.46230  | 2.47552  | -0.11688 |
| C                               | -6.05816 | 0.04979  | 0.03611  |
| C                               | -7.18109 | -0.95800 | 0.02106  |
| C                               | 3.21495  | -0.69300 | -0.05970 |
| C                               | 5.53806  | -1.07511 | -0.06113 |
| C                               | 2.81287  | -2.13221 | -0.19433 |
| C                               | 6.36038  | -1.14699 | 1.19684  |
| N                               | 2.26925  | 1.65844  | -0.04135 |
| N                               | 0.86716  | -0.11485 | -0.00725 |
| N                               | 4.41105  | -0.25440 | 0.04031  |
| H                               | -3.88768 | 1.55192  | 0.04096  |
| H                               | -0.92408 | -1.57139 | 0.00465  |
| H                               | -5.10135 | -2.55823 | 0.01491  |
| H                               | -7.12543 | -1.59318 | -0.86971 |

|                                 |          |          |          |
|---------------------------------|----------|----------|----------|
| H                               | -7.13057 | -1.61352 | 0.89732  |
| H                               | -8.13080 | -0.42267 | 0.02478  |
| H                               | -2.73916 | -3.26471 | 0.00201  |
| H                               | 2.03590  | -2.37512 | 0.53400  |
| H                               | 2.38211  | -2.30006 | -1.18634 |
| H                               | 3.67117  | -2.79382 | -0.07588 |
| H                               | 5.75479  | -1.51838 | 2.03033  |
| H                               | 7.21644  | -1.80234 | 1.03362  |
| H                               | 6.70543  | -0.14529 | 1.47124  |
| H                               | -1.62089 | 2.17718  | 0.02703  |
| H                               | 4.08774  | 2.34250  | 0.76740  |
| H                               | 3.11477  | 3.50953  | -0.17549 |
| H                               | 4.04877  | 2.22701  | -1.00306 |
| O                               | 0.73763  | 3.41323  | -0.01649 |
| O                               | -6.29347 | 1.24506  | 0.05287  |
| O                               | 5.86015  | -1.59514 | -1.11098 |
| Coordinates for Model Number 2b |          |          |          |
| C                               | -4.99835 | 1.31226  | 0.09638  |
| C                               | -3.79492 | 2.00518  | 0.08603  |
| C                               | -2.56456 | 1.32074  | 0.05636  |
| C                               | -1.34359 | 2.10372  | 0.04179  |
| C                               | -2.58097 | -0.08329 | 0.04246  |
| C                               | -3.78700 | -0.78360 | 0.05338  |
| C                               | -4.99877 | -0.08062 | 0.07804  |
| C                               | 1.09435  | 2.62753  | -0.01479 |
| C                               | 1.72382  | 0.48214  | -0.09169 |
| C                               | -0.05550 | 1.68346  | -0.00875 |
| C                               | 3.55570  | 2.28973  | -0.13345 |
| C                               | -3.72859 | -2.28150 | 0.03625  |
| C                               | -5.02073 | -3.05969 | -0.01742 |
| C                               | 2.57136  | -0.72728 | -0.13952 |
| C                               | 4.74083  | -1.63666 | -0.00423 |
| C                               | 1.86253  | -2.01511 | -0.43191 |
| C                               | 5.35363  | -2.01689 | 1.31674  |
| N                               | 2.20259  | 1.77915  | -0.06364 |
| N                               | 0.42339  | 0.38424  | -0.06362 |
| N                               | 3.82262  | -0.58640 | 0.07689  |
| H                               | -5.93790 | 1.85611  | 0.11832  |
| H                               | -3.79673 | 3.09237  | 0.09914  |
| H                               | -1.65090 | -0.63982 | 0.02044  |
| H                               | -1.46151 | 3.18636  | 0.07275  |
| H                               | -5.94471 | -0.61330 | 0.08580  |
| H                               | -5.60042 | -2.79182 | -0.90735 |
| H                               | -5.64456 | -2.84586 | 0.85745  |
| H                               | -4.78748 | -4.12438 | -0.04229 |
| H                               | 1.51917  | -2.01259 | -1.47163 |
| H                               | 2.52373  | -2.87079 | -0.29213 |
| H                               | 0.96943  | -2.11120 | 0.18974  |
| H                               | 4.57465  | -2.26711 | 2.04433  |
| H                               | 6.02586  | -2.86369 | 1.17569  |
| H                               | 5.91062  | -1.16579 | 1.72146  |
| H                               | 4.07998  | 1.88521  | -1.00075 |
| H                               | 4.11860  | 2.03646  | 0.76663  |
| H                               | 3.46539  | 3.37478  | -0.22195 |
| O                               | 1.12774  | 3.84387  | 0.00971  |
| O                               | -2.65546 | -2.85773 | 0.06060  |
| O                               | 5.07677  | -2.11402 | -1.06969 |
| Coordinates for Model Number 3  |          |          |          |
| C                               | -2.78881 | -0.72597 | -0.58073 |
| C                               | -1.56040 | -0.10071 | -0.42703 |
| C                               | -1.48609 | 1.29319  | -0.23526 |
| C                               | -0.23980 | 2.01209  | -0.07092 |
| C                               | -2.68321 | 2.03217  | -0.20614 |
| C                               | -3.91651 | 1.41345  | -0.35689 |

---

|   |          |          |          |
|---|----------|----------|----------|
| C | -3.95210 | 0.03641  | -0.53577 |
| C | 2.20032  | 2.45019  | 0.13579  |
| C | 2.78621  | 0.30255  | -0.08088 |
| C | 1.03408  | 1.54668  | -0.04853 |
| C | 4.65312  | 2.05038  | 0.21692  |
| C | -5.83575 | -1.09221 | 0.29766  |
| C | 3.60899  | -0.92146 | -0.16139 |
| C | 5.74686  | -1.89498 | 0.02720  |
| C | 2.89082  | -2.17030 | -0.57745 |
| C | 6.33898  | -2.32785 | 1.34091  |
| N | 3.28921  | 1.57575  | 0.10710  |
| N | 1.48518  | 0.24201  | -0.17854 |
| N | 4.84855  | -0.82924 | 0.13462  |
| H | -2.85798 | -1.79700 | -0.73839 |
| H | -0.64313 | -0.67782 | -0.45884 |
| H | -2.64032 | 3.10889  | -0.06537 |
| H | -4.84105 | 1.98038  | -0.34007 |
| H | -0.31840 | 3.09114  | 0.05707  |
| H | 1.97897  | -2.29423 | 0.01134  |
| H | 2.58274  | -2.08082 | -1.62424 |
| H | 3.53285  | -3.04617 | -0.48265 |
| H | 5.54945  | -2.56763 | 2.06041  |
| H | 6.98327  | -3.19300 | 1.18244  |
| H | 6.92345  | -1.50601 | 1.76695  |
| H | 5.13128  | 1.66144  | 1.11701  |
| H | 4.59052  | 3.13985  | 0.26705  |
| H | 5.24198  | 1.75004  | -0.65165 |
| O | 2.25950  | 3.65725  | 0.27739  |
| O | -5.18039 | -0.58468 | -0.76626 |
| O | 6.08337  | -2.34564 | -1.04972 |
| F | -6.17038 | -0.15066 | 1.19547  |
| F | -5.11830 | -2.01848 | 0.95478  |
| F | -6.94999 | -1.66157 | -0.14824 |

---

Coordinates for Model Number 4

|   |          |          |          |
|---|----------|----------|----------|
| C | -3.40483 | -1.09461 | -0.00796 |
| C | -2.20535 | -0.39886 | -0.01843 |
| C | -2.20298 | 1.00968  | 0.01897  |
| C | -0.99879 | 1.81291  | 0.01297  |
| C | -3.43981 | 1.67890  | 0.06604  |
| C | -4.63131 | 0.96853  | 0.07540  |
| C | -4.64466 | -0.43357 | 0.03860  |
| C | 1.41230  | 2.42239  | -0.01945 |
| C | 2.13256  | 0.30602  | -0.08302 |
| C | 0.30354  | 1.43241  | -0.02373 |
| C | 3.88553  | 2.19365  | -0.09625 |
| C | 3.03190  | -0.86445 | -0.11972 |
| C | 5.24075  | -1.67889 | -0.02186 |
| C | 2.37496  | -2.19119 | -0.35847 |
| C | 5.92978  | -1.97551 | 1.28274  |
| N | 2.55605  | 1.62189  | -0.05480 |
| N | 0.83581  | 0.15323  | -0.06793 |
| N | 4.28116  | -0.66644 | 0.06092  |
| H | -3.39601 | -2.18059 | -0.03721 |
| H | -1.25784 | -0.92453 | -0.05625 |
| H | -3.45381 | 2.76571  | 0.09599  |
| H | -5.56159 | 1.53362  | 0.11448  |
| H | -1.14177 | 2.89283  | 0.04250  |
| H | -7.25382 | 0.23509  | 0.07351  |
| H | -6.74280 | -3.05228 | 0.03475  |
| H | 1.50999  | -2.30633 | 0.29852  |
| H | 1.99957  | -2.23255 | -1.38611 |
| H | 3.07853  | -3.01191 | -0.21712 |
| H | 5.19643  | -2.22790 | 2.05595  |
| H | 6.63219  | -2.79803 | 1.14537  |
| H | 6.46504  | -1.08468 | 1.62657  |

|                                |          |          |          |
|--------------------------------|----------|----------|----------|
| H                              | 4.44943  | 1.94282  | 0.80389  |
| H                              | 3.74518  | 3.27531  | -0.15782 |
| H                              | 4.43809  | 1.83794  | -0.96767 |
| O                              | 1.39343  | 3.63931  | 0.00416  |
| O                              | -7.22999 | -0.72445 | 0.06844  |
| O                              | -5.87730 | -2.63045 | 0.03046  |
| O                              | 5.54771  | -2.18809 | -1.08148 |
| B                              | -5.97283 | -1.26971 | 0.04676  |
| Coordinates for Model Number 5 |          |          |          |
| C                              | 3.41705  | -0.98794 | -0.01261 |
| C                              | 2.15538  | -0.41733 | -0.08848 |
| C                              | 2.00652  | 0.98162  | -0.01604 |
| C                              | 0.72533  | 1.65212  | -0.07920 |
| C                              | 3.16132  | 1.77311  | 0.13490  |
| C                              | 4.41863  | 1.19055  | 0.20777  |
| C                              | 4.57210  | -0.20190 | 0.13603  |
| C                              | -1.73119 | 1.99533  | -0.26273 |
| C                              | -2.19776 | -0.18123 | -0.49263 |
| C                              | -0.51964 | 1.13787  | -0.24658 |
| C                              | -4.14528 | 1.48583  | -0.55626 |
| C                              | -2.93190 | -1.46501 | -0.67154 |
| C                              | -4.58537 | -1.10906 | 0.99740  |
| C                              | -2.29044 | -2.42405 | -1.62250 |
| C                              | -6.08698 | -1.03324 | 0.92449  |
| N                              | -2.77019 | 1.07222  | -0.41401 |
| N                              | -0.89678 | -0.18694 | -0.42684 |
| N                              | -4.01014 | -1.79929 | -0.07330 |
| H                              | 3.51869  | -2.06844 | -0.06565 |
| H                              | 1.27141  | -1.03516 | -0.19790 |
| H                              | 3.05821  | 2.85399  | 0.19503  |
| H                              | 5.29889  | 1.81656  | 0.32425  |
| H                              | 0.74288  | 2.73669  | 0.02554  |
| H                              | 7.93103  | -0.46526 | 0.42108  |
| H                              | 6.93863  | -2.61291 | 0.21218  |
| H                              | -1.23120 | -2.52880 | -1.36987 |
| H                              | -2.79943 | -3.38709 | -1.57593 |
| H                              | -2.33166 | -2.03292 | -2.64577 |
| H                              | -6.45774 | -0.30663 | 1.64829  |
| H                              | -6.42890 | -0.78809 | -0.08498 |
| H                              | -6.49364 | -2.02026 | 1.17024  |
| H                              | -4.65933 | 0.86637  | -1.29511 |
| H                              | -4.13367 | 2.52353  | -0.89769 |
| H                              | -4.67265 | 1.44209  | 0.40058  |
| O                              | -1.86697 | 3.20297  | -0.19206 |
| O                              | 7.07292  | -0.03751 | 0.36495  |
| O                              | 6.06020  | -2.22860 | 0.15671  |
| O                              | -3.94127 | -0.73492 | 1.95918  |
| B                              | 5.98675  | -0.86170 | 0.22446  |
| Coordinates for Model Number 6 |          |          |          |
| C                              | -2.53351 | -0.16433 | 0.03024  |
| C                              | -1.19615 | 0.19421  | 0.08198  |
| C                              | -0.81888 | 1.54848  | -0.00822 |
| C                              | 0.55646  | 1.99760  | 0.04050  |
| C                              | -1.82825 | 2.51888  | -0.15773 |
| C                              | -3.16440 | 2.15745  | -0.20804 |
| C                              | -3.53019 | 0.80996  | -0.11170 |
| C                              | 3.03333  | 1.93407  | 0.22510  |
| C                              | 3.13715  | -0.28428 | 0.48810  |
| C                              | 1.69647  | 1.28442  | 0.21575  |
| C                              | 5.33010  | 1.04192  | 0.54399  |
| C                              | -4.98411 | 0.48718  | -0.16779 |
| C                              | -7.22062 | -1.09423 | -0.12343 |
| C                              | -7.85029 | -2.47390 | -0.01855 |
| C                              | 3.66471  | -1.66344 | 0.69397  |



---

|   |          |          |          |
|---|----------|----------|----------|
| C | 5.31481  | -1.59201 | -1.01070 |
| C | 2.90214  | -2.48498 | 1.68257  |
| C | 6.81180  | -1.73648 | -0.96898 |
| N | 3.90642  | 0.85678  | 0.39659  |
| N | 1.85206  | -0.08149 | 0.41518  |
| N | 4.66637  | -2.17161 | 0.08612  |
| H | -2.80121 | -1.21486 | 0.09734  |
| H | -0.42663 | -0.56171 | 0.18811  |
| H | -1.55009 | 3.56696  | -0.23333 |
| H | -3.94553 | 2.90223  | -0.32178 |
| H | 0.72044  | 3.06823  | -0.07817 |
| H | -7.57168 | -0.42831 | 0.66910  |
| H | -7.44477 | -0.61586 | -1.08013 |
| H | -7.49865 | -3.13920 | -0.81284 |
| H | -7.63041 | -2.94519 | 0.94420  |
| H | -8.93752 | -2.38679 | -0.10921 |
| H | 1.83832  | -2.45991 | 1.42761  |
| H | 3.27651  | -3.50884 | 1.67958  |
| H | 2.99350  | -2.05856 | 2.68806  |
| H | 7.06541  | -2.77789 | -1.19465 |
| H | 7.26759  | -1.08916 | -1.71891 |
| H | 7.20903  | -1.51986 | 0.02679  |
| H | 5.73621  | 0.33020  | 1.26606  |
| H | 5.48723  | 2.05942  | 0.90926  |
| H | 5.84485  | 0.93692  | -0.41504 |
| O | 3.36354  | 3.10133  | 0.13717  |
| O | -5.83686 | 1.33855  | -0.32701 |
| O | 4.70918  | -1.14427 | -1.96555 |
| S | -5.41370 | -1.23272 | 0.02012  |

Coordinates for Model Number 7

|   |          |          |          |
|---|----------|----------|----------|
| C | -2.25135 | -0.05028 | -0.05208 |
| C | -0.93671 | 0.38749  | -0.04951 |
| C | -0.64571 | 1.76608  | -0.02152 |
| C | 0.69835  | 2.30314  | -0.01653 |
| C | -1.71871 | 2.67778  | 0.00365  |
| C | -3.03144 | 2.23747  | 0.00121  |
| C | -3.31114 | 0.86611  | -0.02787 |
| C | 3.18388  | 2.39836  | -0.02692 |
| C | 3.44903  | 0.17858  | -0.06615 |
| C | 1.89292  | 1.65963  | -0.03388 |
| C | 5.55635  | 1.66024  | -0.08711 |
| C | -4.74601 | 0.45921  | -0.03127 |
| C | -6.89080 | -1.29366 | -0.09431 |
| C | -7.39584 | -1.18545 | 1.33740  |
| C | -7.38043 | -2.55459 | -0.79589 |
| C | 4.08686  | -1.15340 | -0.08322 |
| C | 6.08542  | -2.39966 | 0.01984  |
| C | 3.16789  | -2.32000 | -0.29012 |
| C | 6.74434  | -2.78834 | 1.31541  |
| N | 4.13658  | 1.37736  | -0.04566 |
| N | 2.14813  | 0.29798  | -0.06154 |
| N | 5.35127  | -1.21242 | 0.09057  |
| H | -2.45306 | -1.11753 | -0.07029 |
| H | -0.11864 | -0.32347 | -0.06880 |
| H | -1.50761 | 3.74394  | 0.02498  |
| H | -3.86039 | 2.93764  | 0.02106  |
| H | 0.78140  | 3.38928  | 0.00351  |
| H | -7.19168 | -0.40297 | -0.65522 |
| H | -7.06133 | -2.03805 | 1.93753  |
| H | -7.04893 | -0.26372 | 1.81069  |
| H | -8.49223 | -1.17511 | 1.33965  |
| H | -7.02930 | -2.60564 | -1.83035 |
| H | -7.04732 | -3.45846 | -0.27403 |
| H | -8.47564 | -2.56227 | -0.80469 |
| H | 2.72324  | -2.26365 | -1.28864 |

|                                |          |          |          |
|--------------------------------|----------|----------|----------|
| H                              | 3.70511  | -3.26462 | -0.20374 |
| H                              | 2.34256  | -2.27946 | 0.42496  |
| H                              | 6.00802  | -2.84581 | 2.12362  |
| H                              | 7.24837  | -3.74737 | 1.19340  |
| H                              | 7.47359  | -2.02237 | 1.59855  |
| H                              | 6.05674  | 1.28701  | 0.80766  |
| H                              | 5.64435  | 2.74780  | -0.13969 |
| H                              | 6.01924  | 1.20519  | -0.96458 |
| O                              | 3.41749  | 3.59224  | -0.01323 |
| O                              | -5.64845 | 1.27117  | 0.03652  |
| O                              | 6.25111  | -2.99107 | -1.02853 |
| S                              | -5.05956 | -1.29154 | -0.15704 |
| Coordinates for Model Number 8 |          |          |          |
| C                              | -3.72742 | -1.43414 | -0.02592 |
| C                              | -2.58476 | -0.65225 | -0.03692 |
| C                              | -2.67939 | 0.75271  | 0.01418  |
| C                              | -1.52672 | 1.62953  | 0.00900  |
| C                              | -3.95731 | 1.34027  | 0.07520  |
| C                              | -5.10461 | 0.56393  | 0.08739  |
| C                              | -4.99419 | -0.83230 | 0.03708  |
| C                              | 0.84785  | 2.37110  | -0.02036 |
| C                              | 1.68285  | 0.29867  | -0.08382 |
| C                              | -0.20656 | 1.32040  | -0.02798 |
| C                              | 3.33114  | 2.27800  | -0.08429 |
| C                              | -6.17154 | -1.64452 | 0.05049  |
| C                              | 2.64323  | -0.82395 | -0.11602 |
| C                              | 4.89701  | -1.51427 | -0.03665 |
| C                              | 2.05271  | -2.18913 | -0.30869 |
| C                              | 5.62715  | -1.73639 | 1.25984  |
| N                              | 2.03375  | 1.63414  | -0.05427 |
| N                              | 0.39580  | 0.07340  | -0.07256 |
| N                              | -7.12733 | -2.30558 | 0.06219  |
| N                              | 3.88186  | -0.55513 | 0.04054  |
| H                              | -3.65251 | -2.51602 | -0.06598 |
| H                              | -1.60386 | -1.11126 | -0.08409 |
| H                              | -4.04247 | 2.42277  | 0.11477  |
| H                              | -6.08534 | 1.02558  | 0.13482  |
| H                              | -1.73101 | 2.69898  | 0.04176  |
| H                              | 1.32155  | -2.39407 | 0.47791  |
| H                              | 1.51110  | -2.22674 | -1.25813 |
| H                              | 2.82879  | -2.95428 | -0.31650 |
| H                              | 4.92413  | -1.97817 | 2.06394  |
| H                              | 6.35185  | -2.54144 | 1.13543  |
| H                              | 6.14451  | -0.81622 | 1.55048  |
| H                              | 3.90503  | 2.04275  | 0.81336  |
| H                              | 3.13361  | 3.35137  | -0.12984 |
| H                              | 3.90250  | 1.96548  | -0.95994 |
| O                              | 0.76082  | 3.58361  | 0.00547  |
| O                              | 5.21115  | -2.03051 | -1.09019 |
| Coordinates for Model Number 9 |          |          |          |
| C                              | -3.27777 | -1.21481 | -0.06882 |
| C                              | -2.09569 | -0.48861 | -0.07750 |
| C                              | -2.12625 | 0.91757  | -0.02110 |
| C                              | -0.94250 | 1.74632  | -0.02360 |
| C                              | -3.38330 | 1.54910  | 0.04302  |
| C                              | -4.55787 | 0.81228  | 0.05365  |
| C                              | -4.52863 | -0.58745 | -0.00255 |
| C                              | 1.45689  | 2.40532  | -0.04345 |
| C                              | 2.22061  | 0.30246  | -0.09612 |
| C                              | 0.36988  | 1.39534  | -0.05486 |
| C                              | 3.93493  | 2.22385  | -0.09815 |
| C                              | -5.80101 | -1.40568 | 0.01736  |
| C                              | -6.72511 | -1.06077 | -1.15467 |
| C                              | -6.53579 | -1.26690 | 1.35552  |

---

|   |          |          |          |
|---|----------|----------|----------|
| C | 3.14194  | -0.84956 | -0.11778 |
| C | 5.36025  | -1.62808 | 0.01825  |
| C | 2.51616  | -2.18866 | -0.37292 |
| C | 6.04595  | -1.90222 | 1.32981  |
| N | 2.61684  | 1.62688  | -0.06662 |
| N | 0.92671  | 0.12604  | -0.09299 |
| N | 4.38474  | -0.63093 | 0.08645  |
| H | -1.13656 | -0.99158 | -0.12882 |
| H | -3.42698 | 2.63481  | 0.08690  |
| H | -1.10897 | 2.82294  | 0.00714  |
| H | -5.51025 | 1.33339  | 0.10695  |
| H | -5.50580 | -2.45792 | -0.09121 |
| H | -6.20829 | -1.16465 | -2.11369 |
| H | -7.59586 | -1.72479 | -1.16037 |
| H | -7.09345 | -0.03148 | -1.08219 |
| H | -5.88644 | -1.53262 | 2.19548  |
| H | -6.88209 | -0.23915 | 1.51170  |
| H | -7.41287 | -1.92240 | 1.37959  |
| H | -3.23498 | -2.30078 | -0.11540 |
| H | 1.61192  | -2.30346 | 0.22820  |
| H | 2.21236  | -2.25267 | -1.42310 |
| H | 3.21889  | -2.99844 | -0.17321 |
| H | 5.31143  | -2.15075 | 2.10307  |
| H | 6.75648  | -2.71992 | 1.20622  |
| H | 6.57162  | -1.00220 | 1.66425  |
| H | 4.50208  | 1.87670  | -0.96378 |
| H | 4.49598  | 1.98615  | 0.80732  |
| H | 3.77433  | 3.30244  | -0.16418 |
| O | 1.41621  | 3.62271  | -0.02305 |
| O | 5.68286  | -2.14374 | -1.03402 |

---

Coordinates for Model Number 10

|   |          |          |          |
|---|----------|----------|----------|
| C | -3.02655 | -0.94193 | -0.01198 |
| C | -1.81556 | -0.26551 | -0.01829 |
| C | -1.77777 | 1.14227  | 0.02083  |
| C | -0.55244 | 1.91084  | 0.01689  |
| C | -2.99830 | 1.84054  | 0.06552  |
| C | -4.21543 | 1.17356  | 0.07233  |
| C | -4.21915 | -0.21900 | 0.03352  |
| C | 1.87709  | 2.44398  | -0.01818 |
| C | 2.52929  | 0.30526  | -0.08040 |
| C | 0.73766  | 1.49059  | -0.01883 |
| C | 4.34158  | 2.13470  | -0.10732 |
| C | 3.39062  | -0.89337 | -0.11566 |
| C | 5.57675  | -1.77345 | -0.03083 |
| C | 2.68848  | -2.20122 | -0.33067 |
| C | 6.26338  | -2.08150 | 1.27237  |
| N | 2.99447  | 1.60641  | -0.05616 |
| N | 1.22798  | 0.19451  | -0.06172 |
| N | 4.64714  | -0.73338 | 0.05039  |
| H | -3.04996 | -2.02604 | -0.04305 |
| H | -0.88261 | -0.81707 | -0.05498 |
| H | -2.98886 | 2.92716  | 0.09557  |
| H | -5.14862 | 1.72514  | 0.10753  |
| H | -0.66368 | 2.99435  | 0.04596  |
| H | 1.87117  | -2.30859 | 0.38674  |
| H | 2.23688  | -2.21465 | -1.32738 |
| H | 3.38162  | -3.03890 | -0.25180 |
| H | 5.52668  | -2.33008 | 2.04386  |
| H | 6.95648  | -2.91138 | 1.13206  |
| H | 6.80738  | -1.19792 | 1.62095  |
| H | 4.90048  | 1.87570  | 0.79376  |
| H | 4.23639  | 3.21969  | -0.17963 |
| H | 4.87883  | 1.75144  | -0.97634 |
| O | 1.89915  | 3.66082  | 0.00404  |
| O | 5.86305  | -2.29778 | -1.08882 |

---

| BR                              | -5.86775 | -1.14565 | 0.04214  |
|---------------------------------|----------|----------|----------|
| Coordinates for Model Number 11 |          |          |          |
| C                               | -3.41353 | -1.10410 | -0.01126 |
| C                               | -2.21928 | -0.39868 | -0.01668 |
| C                               | -2.22733 | 1.00925  | 0.01322  |
| C                               | -1.02520 | 1.81597  | 0.01149  |
| C                               | -3.46961 | 1.67371  | 0.04764  |
| C                               | -4.65814 | 0.96450  | 0.05203  |
| C                               | -4.64515 | -0.43557 | 0.02291  |
| C                               | 1.38629  | 2.42634  | -0.01432 |
| C                               | 2.10731  | 0.31104  | -0.07956 |
| C                               | 0.27707  | 1.43549  | -0.02136 |
| C                               | 3.85996  | 2.19898  | -0.08705 |
| C                               | -5.95592 | -1.15644 | 0.02987  |
| C                               | -5.95995 | -2.66511 | 0.00074  |
| C                               | 3.00554  | -0.86069 | -0.11643 |
| C                               | 5.21943  | -1.67196 | -0.04315 |
| C                               | 2.34257  | -2.19206 | -0.31142 |
| C                               | 5.92575  | -1.94831 | 1.25644  |
| N                               | 2.53065  | 1.62601  | -0.04949 |
| N                               | 0.81021  | 0.15691  | -0.06615 |
| N                               | 4.25764  | -0.66088 | 0.03776  |
| H                               | -3.38203 | -2.18923 | -0.03485 |
| H                               | -1.26834 | -0.91843 | -0.04443 |
| H                               | -3.48752 | 2.76043  | 0.07102  |
| H                               | -5.61829 | 1.47027  | 0.07808  |
| H                               | -1.17074 | 2.89537  | 0.04025  |
| H                               | -5.42639 | -3.07624 | 0.86471  |
| H                               | -6.99326 | -3.01280 | 0.01569  |
| H                               | -5.46417 | -3.04139 | -0.90087 |
| H                               | 1.61004  | -2.36376 | 0.48184  |
| H                               | 1.78992  | -2.19538 | -1.25514 |
| H                               | 3.07847  | -2.99599 | -0.33173 |
| H                               | 5.20356  | -2.19513 | 2.04184  |
| H                               | 6.63036  | -2.76911 | 1.12030  |
| H                               | 6.46098  | -1.05091 | 1.58252  |
| H                               | 4.42470  | 1.94035  | 0.81027  |
| H                               | 3.71877  | 3.28098  | -0.13847 |
| H                               | 4.41173  | 1.85170  | -0.96220 |
| O                               | 1.36630  | 3.64241  | 0.01114  |
| O                               | -7.00168 | -0.53083 | 0.05849  |
| O                               | 5.51396  | -2.19432 | -1.09968 |
| Coordinates for Model Number 12 |          |          |          |
| C                               | -3.55823 | -0.91678 | 0.00984  |
| C                               | -2.35054 | -0.24070 | -0.00255 |
| C                               | -2.31023 | 1.16826  | 0.03134  |
| C                               | -1.08600 | 1.93244  | 0.02019  |
| C                               | -3.53443 | 1.86432  | 0.07721  |
| C                               | -4.74593 | 1.19641  | 0.08981  |
| C                               | -4.76402 | -0.20188 | 0.05627  |
| C                               | 1.34605  | 2.45793  | -0.02623 |
| C                               | 1.99196  | 0.31635  | -0.08001 |
| C                               | 0.20481  | 1.50919  | -0.01804 |
| C                               | 3.80933  | 2.13941  | -0.12416 |
| C                               | 2.84905  | -0.88441 | -0.11268 |
| C                               | 5.03000  | -1.77427 | -0.02993 |
| C                               | 2.14459  | -2.19072 | -0.33036 |
| C                               | 5.72321  | -2.08236 | 1.26991  |
| N                               | 2.46078  | 1.61620  | -0.06391 |
| N                               | 0.68985  | 0.21145  | -0.05599 |
| N                               | -6.09298 | -2.03637 | 0.04296  |
| N                               | -6.03319 | -0.80581 | 0.07188  |
| N                               | -6.28925 | -3.15412 | 0.02023  |
| N                               | 4.10662  | -0.72936 | 0.05366  |

|                                 |          |          |          |
|---------------------------------|----------|----------|----------|
| H                               | -3.56536 | -2.00345 | -0.01759 |
| H                               | -1.41711 | -0.79132 | -0.04027 |
| H                               | -3.52540 | 2.95091  | 0.10323  |
| H                               | -5.68685 | 1.73558  | 0.12512  |
| H                               | -1.19429 | 3.01645  | 0.04476  |
| H                               | 1.28664  | -2.27065 | 0.34082  |
| H                               | 1.75375  | -2.22857 | -1.35223 |
| H                               | 2.82238  | -3.03323 | -0.19083 |
| H                               | 4.98997  | -2.32868 | 2.04546  |
| H                               | 6.41371  | -2.91397 | 1.12703  |
| H                               | 6.27059  | -1.19952 | 1.61497  |
| H                               | 4.37160  | 1.88315  | 0.77557  |
| H                               | 3.70772  | 3.22435  | -0.20205 |
| H                               | 4.34115  | 1.74931  | -0.99351 |
| O                               | 1.37358  | 3.67537  | -0.01043 |
| O                               | 5.30720  | -2.30429 | -1.08776 |
| Coordinates for Model Number 13 |          |          |          |
| C                               | -3.67279 | -1.22060 | 0.01317  |
| C                               | -2.50219 | -0.47529 | -0.00455 |
| C                               | -2.53290 | 0.93128  | 0.01928  |
| C                               | -1.35301 | 1.75789  | 0.00546  |
| C                               | -3.79582 | 1.56094  | 0.06101  |
| C                               | -4.96664 | 0.83012  | 0.07830  |
| C                               | -4.91413 | -0.57103 | 0.05464  |
| C                               | 1.04394  | 2.42257  | -0.03188 |
| C                               | 1.81501  | 0.32141  | -0.08345 |
| C                               | -0.03787 | 1.41056  | -0.03057 |
| C                               | 3.52171  | 2.24942  | -0.10060 |
| C                               | -6.12197 | -2.61626 | 0.05318  |
| C                               | 2.73859  | -0.82693 | -0.11531 |
| C                               | 4.96263  | -1.59795 | -0.02944 |
| C                               | 2.11181  | -2.17070 | -0.34485 |
| C                               | 5.69244  | -1.85091 | 1.26269  |
| N                               | 2.20640  | 1.64738  | -0.06206 |
| N                               | 0.52074  | 0.14265  | -0.06735 |
| N                               | 3.98598  | -0.60446 | 0.05751  |
| H                               | -3.61223 | -2.30282 | -0.00625 |
| H                               | -1.54048 | -0.97530 | -0.03779 |
| H                               | -3.84405 | 2.64684  | 0.08041  |
| H                               | -5.93757 | 1.31375  | 0.10987  |
| H                               | -1.52054 | 2.83463  | 0.02787  |
| H                               | -7.17365 | -2.90323 | 0.07315  |
| H                               | -5.65721 | -3.00730 | -0.86001 |
| H                               | -5.61587 | -3.03432 | 0.93184  |
| H                               | 1.22084  | -2.28250 | 0.27634  |
| H                               | 1.78660  | -2.24593 | -1.38780 |
| H                               | 2.82119  | -2.97614 | -0.15201 |
| H                               | 4.98486  | -2.09264 | 2.06289  |
| H                               | 6.40313  | -2.66658 | 1.12725  |
| H                               | 6.22350  | -0.94360 | 1.56762  |
| H                               | 4.09119  | 2.00694  | 0.79832  |
| H                               | 3.35601  | 3.32781  | -0.15709 |
| H                               | 4.08331  | 1.91129  | -0.97343 |
| O                               | 1.00068  | 3.64076  | -0.01484 |
| O                               | -6.10632 | -1.20312 | 0.07440  |
| O                               | 5.25470  | -2.12703 | -1.08441 |
| Coordinates for Model Number 14 |          |          |          |
| C                               | -3.18833 | -0.58267 | -0.01951 |
| C                               | -1.93308 | 0.01112  | -0.01825 |
| C                               | -1.78810 | 1.40886  | 0.03659  |
| C                               | -0.51267 | 2.08070  | 0.03291  |
| C                               | -2.96228 | 2.19060  | 0.09099  |
| C                               | -4.21565 | 1.61159  | 0.09206  |
| C                               | -4.33757 | 0.21682  | 0.03589  |

---

|   |          |          |          |
|---|----------|----------|----------|
| C | 1.95070  | 2.43085  | -0.01602 |
| C | 2.44302  | 0.24749  | -0.05626 |
| C | 0.74633  | 1.56707  | 0.00049  |
| C | 4.38414  | 1.93683  | -0.12598 |
| C | -5.78887 | -1.66339 | -0.01573 |
| C | -7.21374 | -1.95476 | 0.00026  |
| C | -8.38812 | -2.23388 | 0.01139  |
| C | 3.20700  | -1.01322 | -0.07882 |
| C | 5.31573  | -2.06529 | -0.04673 |
| C | 2.39827  | -2.26821 | -0.22924 |
| C | 6.09246  | -2.34617 | 1.21173  |
| N | 3.00269  | 1.51133  | -0.05329 |
| N | 1.13691  | 0.23747  | -0.02747 |
| N | 4.47879  | -0.95140 | 0.04215  |
| H | -3.25732 | -1.66365 | -0.06570 |
| H | -1.04230 | -0.60592 | -0.06275 |
| H | -2.87653 | 3.27347  | 0.13279  |
| H | -5.11875 | 2.21167  | 0.13420  |
| H | -0.54022 | 3.16992  | 0.05597  |
| H | -5.33711 | -2.06942 | -0.93201 |
| H | -5.30171 | -2.14184 | 0.84576  |
| H | -9.42890 | -2.47072 | 0.02138  |
| H | 1.93903  | -2.28868 | -1.22255 |
| H | 3.02221  | -3.15515 | -0.11932 |
| H | 1.58185  | -2.27698 | 0.49664  |
| H | 5.41818  | -2.44933 | 2.06833  |
| H | 6.68087  | -3.25491 | 1.08142  |
| H | 6.75791  | -1.50352 | 1.42604  |
| H | 4.93574  | 1.64348  | 0.76920  |
| H | 4.36005  | 3.02612  | -0.20604 |
| H | 4.87881  | 1.50757  | -0.99875 |
| O | 2.06745  | 3.64395  | -0.00760 |
| O | -5.60522 | -0.25645 | 0.03860  |
| O | 5.47029  | -2.67777 | -1.08560 |

Coordinates for Model Number 15

|   |          |          |          |
|---|----------|----------|----------|
| C | -2.55953 | -0.27567 | -0.04361 |
| C | -1.26796 | 0.22908  | -0.04840 |
| C | -1.04850 | 1.61914  | 0.00009  |
| C | 0.26909  | 2.22048  | -0.00713 |
| C | -2.16711 | 2.47439  | 0.05357  |
| C | -3.45428 | 1.96574  | 0.06227  |
| C | -3.66714 | 0.58219  | 0.01378  |
| C | 2.74954  | 2.42193  | -0.04647 |
| C | 3.10806  | 0.21557  | -0.07244 |
| C | 1.49003  | 1.62916  | -0.03303 |
| C | 5.15036  | 1.78277  | -0.13889 |
| C | -5.07678 | 0.09053  | 0.03231  |
| C | -5.31425 | -1.40943 | -0.05522 |
| C | -6.78567 | -1.78910 | -0.14385 |
| C | -7.63150 | -1.58435 | 1.08134  |
| C | 3.79916  | -1.09045 | -0.08273 |
| C | 5.84145  | -2.25994 | 0.02695  |
| C | 2.92555  | -2.29353 | -0.27944 |
| C | 6.51130  | -2.61799 | 1.32544  |
| N | 3.74434  | 1.44153  | -0.07030 |
| N | 1.80318  | 0.27949  | -0.05382 |
| N | 5.06489  | -1.09837 | 0.08921  |
| H | -2.70008 | -1.35138 | -0.08640 |
| H | -0.41375 | -0.43681 | -0.09261 |
| H | -2.01023 | 3.54944  | 0.08830  |
| H | -4.31887 | 2.62063  | 0.10458  |
| H | 0.30242  | 3.30917  | 0.00919  |
| H | -4.85678 | -1.88165 | 0.82529  |
| H | -4.81195 | -1.80800 | -0.94310 |
| H | -7.65849 | -0.51617 | 1.32125  |

---

|   |          |          |          |
|---|----------|----------|----------|
| H | -8.64187 | -1.95304 | 0.89992  |
| H | -7.19343 | -2.10414 | 1.94141  |
| H | 2.10067  | -2.27821 | 0.43698  |
| H | 2.47789  | -2.26188 | -1.27765 |
| H | 3.49819  | -3.21639 | -0.18656 |
| H | 5.77943  | -2.67960 | 2.13743  |
| H | 7.03531  | -3.56776 | 1.21385  |
| H | 7.22622  | -1.83364 | 1.59515  |
| H | 5.67788  | 1.46145  | 0.76068  |
| H | 5.19166  | 2.87079  | -0.22635 |
| H | 5.62117  | 1.31961  | -1.00760 |
| O | 2.93109  | 3.62427  | -0.04498 |
| O | -6.00617 | 0.87421  | 0.11366  |
| O | -7.22671 | -2.25705 | -1.17265 |
| O | 6.02884  | -2.85044 | -1.01790 |

---

Coordinates for Model Number 16a

|   |          |          |          |
|---|----------|----------|----------|
| C | -3.49974 | -1.82217 | -0.02308 |
| C | -2.40535 | -0.96886 | -0.03463 |
| C | -2.59700 | 0.42512  | 0.00615  |
| C | -1.51232 | 1.37754  | -0.00468 |
| C | -3.91209 | 0.92925  | 0.05731  |
| C | -5.00371 | 0.07910  | 0.07060  |
| C | -4.79212 | -1.30735 | 0.03025  |
| C | 0.79672  | 2.29989  | -0.04255 |
| C | 1.79390  | 0.29608  | -0.05976 |
| C | -0.16833 | 1.17405  | -0.02828 |
| C | 3.27917  | 2.39920  | -0.11248 |
| C | 2.83880  | -0.74400 | -0.07123 |
| C | 5.14028  | -1.25193 | -0.03975 |
| C | 2.35949  | -2.15807 | -0.21646 |
| C | 5.95488  | -1.35125 | 1.22211  |
| N | 2.03743  | 1.65689  | -0.06210 |
| N | 0.52765  | -0.02472 | -0.04182 |
| N | 4.05750  | -0.37579 | 0.04985  |
| H | -3.35183 | -2.89973 | -0.05581 |
| H | -1.39802 | -1.36619 | -0.07616 |
| H | -4.09297 | 1.99992  | 0.08668  |
| H | -1.79474 | 2.42980  | 0.00809  |
| H | -5.70933 | -3.00181 | 0.01126  |
| H | -6.88692 | -0.15039 | 0.11894  |
| H | 1.54460  | -2.35268 | 0.48440  |
| H | 1.95539  | -2.30461 | -1.22313 |
| H | 3.17431  | -2.86703 | -0.06719 |
| H | 5.33340  | -1.70487 | 2.05188  |
| H | 6.78970  | -2.03416 | 1.06184  |
| H | 6.33003  | -0.36155 | 1.50058  |
| H | 3.87834  | 2.22300  | 0.78236  |
| H | 2.99697  | 3.45304  | -0.17124 |
| H | 3.86642  | 2.11980  | -0.98905 |
| O | 0.62202  | 3.50574  | -0.04199 |
| O | -5.92483 | -2.06436 | 0.04637  |
| O | -6.25930 | 0.58399  | 0.12062  |
| O | 5.44271  | -1.79930 | -1.08249 |

---

Coordinates for Model Number 16b

|   |          |          |          |
|---|----------|----------|----------|
| C | -3.72932 | -1.36345 | 0.00468  |
| C | -2.59078 | -0.57926 | -0.01054 |
| C | -2.69235 | 0.82621  | 0.01866  |
| C | -1.54347 | 1.69993  | 0.00885  |
| C | -3.96891 | 1.41500  | 0.06247  |
| C | -5.11396 | 0.62867  | 0.07721  |
| C | -4.99698 | -0.75581 | 0.04866  |
| C | 0.83005  | 2.44770  | -0.02229 |
| C | 1.66986  | 0.37381  | -0.07899 |
| C | -0.21854 | 1.39884  | -0.02596 |

---

|   |          |          |          |
|---|----------|----------|----------|
| C | 3.31286  | 2.35657  | -0.08533 |
| C | 2.62739  | -0.74738 | -0.10972 |
| C | 4.88093  | -1.44330 | -0.04893 |
| C | 2.03255  | -2.11416 | -0.28082 |
| C | 5.62830  | -1.65039 | 1.24164  |
| N | 2.01734  | 1.71227  | -0.05361 |
| N | 0.38347  | 0.15103  | -0.06577 |
| N | 3.87047  | -0.48386 | 0.03047  |
| H | -1.61636 | -1.05284 | -0.04456 |
| H | -4.05983 | 2.49693  | 0.08556  |
| H | -1.75076 | 2.76921  | 0.03492  |
| H | -6.88468 | -1.14354 | 0.08893  |
| H | -6.09886 | 1.08908  | 0.11063  |
| H | -4.50908 | -3.09458 | -0.00883 |
| H | 1.30903  | -2.30916 | 0.51522  |
| H | 1.47880  | -2.16126 | -1.22259 |
| H | 2.80761  | -2.88051 | -0.28907 |
| H | 4.93540  | -1.87946 | 2.05785  |
| H | 6.34977  | -2.45851 | 1.11873  |
| H | 6.15123  | -0.72761 | 1.51281  |
| H | 3.88323  | 2.04772  | -0.96328 |
| H | 3.89084  | 2.11943  | 0.80960  |
| H | 3.11396  | 3.43006  | -0.12690 |
| O | 0.74587  | 3.66338  | -0.00049 |
| O | -6.04932 | -1.62089 | 0.06030  |
| O | -3.62166 | -2.71306 | -0.02206 |
| O | 5.18667  | -1.97532 | -1.09832 |

---

Coordinates for Model Number 17

|   |          |          |          |
|---|----------|----------|----------|
| C | -3.12807 | -0.45900 | -0.14519 |
| C | -1.86062 | 0.10567  | -0.10763 |
| C | -1.68460 | 1.49743  | -0.00103 |
| C | -0.39532 | 2.13913  | 0.03963  |
| C | -2.84199 | 2.30332  | 0.06478  |
| C | -4.10747 | 1.75287  | 0.02991  |
| C | -4.26165 | 0.36307  | -0.07492 |
| C | 2.07584  | 2.43502  | 0.05204  |
| C | 2.52121  | 0.24328  | -0.04924 |
| C | 0.85336  | 1.59890  | 0.01376  |
| C | 4.49998  | 1.88986  | -0.01301 |
| C | -5.76616 | -1.48570 | -0.19244 |
| C | -7.24168 | -1.70930 | -0.20348 |
| C | -7.86395 | -2.56701 | 0.60307  |
| C | 3.25610  | -1.03350 | -0.09602 |
| C | 5.33715  | -2.13823 | -0.06118 |
| C | 2.42017  | -2.26433 | -0.29280 |
| C | 6.08676  | -2.47301 | 1.20074  |
| N | 3.10816  | 1.49366  | 0.00868  |
| N | 1.21486  | 0.26257  | -0.04993 |
| N | 4.52708  | -1.00660 | 0.04586  |
| H | -3.22394 | -1.53551 | -0.22897 |
| H | -0.98289 | -0.52906 | -0.16181 |
| H | -2.73200 | 3.38180  | 0.14620  |
| H | -4.99707 | 2.37206  | 0.08358  |
| H | -0.39955 | 3.22733  | 0.09942  |
| H | -7.80164 | -1.13971 | -0.94359 |
| H | -5.31616 | -1.86258 | -1.12364 |
| H | -5.29952 | -2.00692 | 0.65394  |
| H | -8.93505 | -2.73156 | 0.53777  |
| H | -7.32223 | -3.13665 | 1.35490  |
| H | 1.97447  | -2.24664 | -1.29220 |
| H | 3.02134  | -3.16878 | -0.19927 |
| H | 1.59394  | -2.27329 | 0.42177  |
| H | 5.39812  | -2.57439 | 2.04599  |
| H | 6.64850  | -3.39640 | 1.05648  |
| H | 6.77543  | -1.65709 | 1.44339  |



|                                 |          |          |          |
|---------------------------------|----------|----------|----------|
| H                               | 5.02375  | 1.53887  | 0.87802  |
| H                               | 4.50119  | 2.98208  | -0.03979 |
| H                               | 5.00541  | 1.49279  | -0.89507 |
| O                               | 2.21848  | 3.64463  | 0.10312  |
| O                               | -5.53484 | -0.08436 | -0.09674 |
| O                               | 5.49369  | -2.72639 | -1.11386 |
| Coordinates for Model Number 18 |          |          |          |
| C                               | -3.86979 | -1.71358 | -0.02142 |
| C                               | -2.76840 | -0.88132 | -0.03410 |
| C                               | -2.91548 | 0.52245  | 0.01938  |
| C                               | -1.81595 | 1.44595  | 0.00718  |
| C                               | -4.22709 | 1.03618  | 0.08675  |
| C                               | -5.33399 | 0.20943  | 0.10250  |
| C                               | -5.17528 | -1.18683 | 0.04696  |
| C                               | 0.51281  | 2.32042  | -0.03570 |
| C                               | 1.46924  | 0.29570  | -0.07205 |
| C                               | -0.47279 | 1.21717  | -0.02850 |
| C                               | 2.99673  | 2.36743  | -0.10426 |
| C                               | 2.48776  | -0.76710 | -0.08599 |
| C                               | 4.77943  | -1.32990 | -0.04876 |
| C                               | 1.97141  | -2.17071 | -0.21060 |
| C                               | 5.60451  | -1.40866 | 1.20886  |
| N                               | 1.73992  | 1.65178  | -0.06270 |
| N                               | 0.19528  | 0.00414  | -0.05555 |
| N                               | -6.26385 | -2.02113 | 0.10228  |
| N                               | 3.71711  | -0.43089 | 0.02929  |
| H                               | -3.73220 | -2.79165 | -0.06067 |
| H                               | -1.76904 | -1.29995 | -0.08695 |
| H                               | -4.37060 | 2.11332  | 0.12664  |
| H                               | -6.33237 | 0.63603  | 0.15924  |
| H                               | -6.14499 | -2.97966 | -0.18250 |
| H                               | -2.07476 | 2.50445  | 0.03246  |
| H                               | -7.17277 | -1.63148 | -0.08802 |
| H                               | 1.24773  | -2.37325 | 0.58314  |
| H                               | 1.43702  | -2.28293 | -1.15850 |
| H                               | 2.78631  | -2.89377 | -0.18108 |
| H                               | 4.96809  | -1.56017 | 2.08637  |
| H                               | 6.33014  | -2.21756 | 1.11828  |
| H                               | 6.13262  | -0.46025 | 1.35344  |
| H                               | 3.59213  | 2.16741  | 0.78831  |
| H                               | 2.73749  | 3.42790  | -0.15011 |
| H                               | 3.57876  | 2.08632  | -0.98395 |
| O                               | 0.36536  | 3.53174  | -0.02458 |
| O                               | 5.06987  | -1.90732 | -1.07933 |
| Coordinates for Model Number 19 |          |          |          |
| C                               | -0.98632 | 1.47295  | -0.05706 |
| C                               | 1.35088  | 2.31935  | -0.07752 |
| C                               | 2.28293  | 0.28543  | -0.10045 |
| C                               | 0.34887  | 1.22337  | -0.08502 |
| C                               | 3.83584  | 2.33980  | -0.11329 |
| C                               | -2.10393 | 0.55776  | -0.05465 |
| C                               | -3.38177 | 1.09234  | 0.05679  |
| C                               | -1.95863 | -0.85942 | -0.16084 |
| C                               | -4.53242 | 0.27461  | 0.07540  |
| C                               | -3.06074 | -1.67132 | -0.15414 |
| C                               | -4.37391 | -1.14005 | -0.03490 |
| C                               | -5.83832 | 0.81550  | 0.19996  |
| C                               | -5.52644 | -1.96063 | -0.02017 |
| C                               | -6.93887 | -0.00771 | 0.21412  |
| C                               | -6.78114 | -1.40781 | 0.10226  |
| C                               | 3.29531  | -0.78766 | -0.09164 |
| C                               | 5.57488  | -1.36959 | 0.04158  |
| C                               | 2.77798  | -2.18259 | -0.28146 |
| C                               | 6.32863  | -1.49601 | 1.33852  |

---

|                                 |          |          |          |
|---------------------------------|----------|----------|----------|
| N                               | 2.56976  | 1.63799  | -0.08667 |
| N                               | 1.00774  | 0.00364  | -0.10509 |
| N                               | 4.51767  | -0.45869 | 0.08848  |
| H                               | -1.23195 | 2.53398  | -0.02488 |
| H                               | -3.50583 | 2.17036  | 0.13632  |
| H                               | -0.96068 | -1.27369 | -0.24704 |
| H                               | -2.94183 | -2.74865 | -0.23996 |
| H                               | -5.95368 | 1.89310  | 0.28486  |
| H                               | -5.40576 | -3.03757 | -0.10608 |
| H                               | -7.93453 | 0.41518  | 0.31044  |
| H                               | -7.65790 | -2.04901 | 0.11347  |
| H                               | 1.92137  | -2.35795 | 0.37320  |
| H                               | 2.42170  | -2.30206 | -1.30979 |
| H                               | 3.55959  | -2.92113 | -0.10195 |
| H                               | 5.64444  | -1.69980 | 2.16861  |
| H                               | 7.07051  | -2.29030 | 1.25288  |
| H                               | 6.83016  | -0.54813 | 1.56066  |
| H                               | 4.43249  | 2.03628  | -0.97529 |
| H                               | 4.40884  | 2.14849  | 0.79538  |
| H                               | 3.59030  | 3.40206  | -0.18313 |
| O                               | 1.21254  | 3.52949  | -0.06864 |
| O                               | 5.90829  | -1.91993 | -0.98972 |
| Coordinates for Model Number 20 |          |          |          |
| C                               | -1.27512 | 0.89162  | 0.09447  |
| C                               | 0.90741  | 2.09412  | 0.07778  |
| C                               | 2.14054  | 0.22529  | -0.01028 |
| C                               | 0.09091  | 0.86673  | 0.06930  |
| C                               | 3.35748  | 2.49222  | -0.03930 |
| C                               | -2.17968 | -0.20893 | 0.06684  |
| C                               | -3.63235 | -0.19194 | 0.01995  |
| C                               | -1.81482 | -1.55103 | 0.12855  |
| C                               | -4.06146 | -1.53510 | 0.07714  |
| C                               | -4.61003 | 0.82267  | -0.08235 |
| C                               | -5.39939 | -1.92961 | 0.08323  |
| C                               | -5.95253 | 0.43412  | -0.06647 |
| C                               | -6.33723 | -0.90954 | 0.02097  |
| C                               | 3.29666  | -0.68162 | -0.07428 |
| C                               | 5.63985  | -0.92531 | -0.12224 |
| C                               | 2.98173  | -2.13938 | -0.24892 |
| C                               | 6.53574  | -0.90496 | 1.08756  |
| N                               | 2.21699  | 1.60489  | 0.02857  |
| N                               | 0.91710  | -0.24046 | 0.01250  |
| N                               | -4.25874 | 2.16452  | -0.14365 |
| N                               | -2.92643 | -2.32205 | 0.13669  |
| N                               | 4.47075  | -0.18021 | 0.02772  |
| H                               | -1.68631 | 1.89513  | 0.16621  |
| H                               | -0.81901 | -1.96698 | 0.17739  |
| H                               | -2.92875 | -3.32751 | 0.19061  |
| H                               | -5.69059 | -2.97387 | 0.13384  |
| H                               | -6.71930 | 1.20203  | -0.13574 |
| H                               | -7.39565 | -1.15265 | 0.02425  |
| H                               | -3.42931 | 2.38196  | -0.67584 |
| H                               | -5.01982 | 2.78507  | -0.37813 |
| H                               | 2.20863  | -2.44331 | 0.46004  |
| H                               | 2.57986  | -2.30677 | -1.25303 |
| H                               | 3.87497  | -2.75301 | -0.13137 |
| H                               | 5.99331  | -1.24897 | 1.97446  |
| H                               | 7.40619  | -1.53669 | 0.90828  |
| H                               | 6.85824  | 0.12189  | 1.28740  |
| H                               | 4.00581  | 2.37105  | 0.83044  |
| H                               | 2.94849  | 3.50522  | -0.06134 |
| H                               | 3.94388  | 2.30541  | -0.94091 |
| O                               | 0.58946  | 3.27328  | 0.10442  |
| O                               | 5.94432  | -1.45338 | -1.17531 |

---

| Coordinates for Model Number 21                    |          |          |          |
|----------------------------------------------------|----------|----------|----------|
| C                                                  | -0.66422 | 1.71469  | -0.04093 |
| C                                                  | 1.72316  | 2.41036  | -0.05921 |
| C                                                  | 2.51837  | 0.32054  | -0.10654 |
| C                                                  | 0.65065  | 1.38093  | -0.07262 |
| C                                                  | 4.20349  | 2.26922  | -0.10415 |
| C                                                  | -1.83629 | 0.86977  | -0.03792 |
| C                                                  | -3.08801 | 1.45664  | 0.05500  |
| C                                                  | -1.79006 | -0.55871 | -0.12443 |
| C                                                  | -4.25429 | 0.66576  | 0.06849  |
| C                                                  | -4.07366 | -0.74567 | -0.02478 |
| C                                                  | -5.55425 | 1.22114  | 0.17049  |
| C                                                  | -5.23125 | -1.57950 | -0.01627 |
| C                                                  | -6.64554 | 0.38734  | 0.17792  |
| C                                                  | -6.48680 | -1.01049 | 0.08388  |
| C                                                  | 3.45593  | -0.81998 | -0.11698 |
| C                                                  | 5.69362  | -1.55500 | 0.01617  |
| C                                                  | 2.84127  | -2.17414 | -0.31176 |
| C                                                  | 6.37181  | -1.79865 | 1.33763  |
| N                                                  | 2.89440  | 1.65124  | -0.07849 |
| N                                                  | 1.22824  | 0.12156  | -0.10822 |
| N                                                  | -2.85004 | -1.32652 | -0.12012 |
| N                                                  | 4.69724  | -0.57676 | 0.06256  |
| H                                                  | -0.84700 | 2.78854  | -0.00663 |
| H                                                  | -3.17904 | 2.53898  | 0.12256  |
| H                                                  | -0.82313 | -1.04779 | -0.19915 |
| H                                                  | -5.67014 | 2.29875  | 0.24213  |
| H                                                  | -7.64763 | 0.79857  | 0.25613  |
| H                                                  | -7.36614 | -1.65143 | 0.09062  |
| H                                                  | -5.87995 | -3.36290 | -0.09151 |
| H                                                  | 2.10375  | -2.36625 | 0.47238  |
| H                                                  | 3.60413  | -2.95290 | -0.31726 |
| H                                                  | 2.29950  | -2.20240 | -1.26135 |
| H                                                  | 5.63551  | -2.04808 | 2.10874  |
| H                                                  | 7.09624  | -2.60643 | 1.23091  |
| H                                                  | 6.88135  | -0.88584 | 1.66250  |
| H                                                  | 4.76529  | 2.03612  | 0.80192  |
| H                                                  | 4.02675  | 3.34548  | -0.16605 |
| H                                                  | 4.77765  | 1.93394  | -0.96961 |
| O                                                  | 1.65936  | 3.62593  | -0.03970 |
| O                                                  | -5.02980 | -2.91041 | -0.10755 |
| O                                                  | 6.03721  | -2.07425 | -1.02712 |
| Coordinates for Model Number 21-H (with H-capping) |          |          |          |
| C                                                  | -0.60369 | -1.69151 | 0.01384  |
| C                                                  | 1.79348  | -2.38307 | 0.03666  |
| C                                                  | 2.56321  | -0.27831 | -0.00029 |
| C                                                  | 0.71147  | -1.34981 | 0.01244  |
| C                                                  | -1.78157 | -0.85884 | -0.00551 |
| C                                                  | -3.02821 | -1.46591 | 0.00137  |
| C                                                  | -1.75077 | 0.57325  | -0.03161 |
| C                                                  | -4.20468 | -0.69174 | -0.01673 |
| C                                                  | -4.03967 | 0.72458  | -0.04293 |
| C                                                  | -5.49964 | -1.26792 | -0.00939 |
| C                                                  | -5.20786 | 1.54305  | -0.06176 |
| C                                                  | -6.60171 | -0.44857 | -0.02778 |
| C                                                  | -6.45843 | 0.95363  | -0.05406 |
| C                                                  | 3.52994  | 0.80331  | -0.01556 |
| C                                                  | 5.68117  | 1.61210  | 0.03120  |
| N                                                  | 2.94146  | -1.59881 | 0.02681  |
| N                                                  | 1.27412  | -0.08162 | -0.01133 |
| N                                                  | -2.82150 | 1.32476  | -0.04984 |
| N                                                  | 4.78210  | 0.53851  | -0.03313 |
| H                                                  | -0.77809 | -2.76742 | 0.03291  |
| H                                                  | 3.89524  | -1.92827 | 0.03497  |

---

|                                 |          |          |          |
|---------------------------------|----------|----------|----------|
| H                               | -3.10580 | -2.55121 | 0.02136  |
| H                               | -0.78966 | 1.07911  | -0.03645 |
| H                               | -5.60323 | -2.34891 | 0.01092  |
| H                               | -7.60037 | -0.87518 | -0.02230 |
| H                               | -7.34622 | 1.58261  | -0.06835 |
| H                               | -5.87623 | 3.32097  | -0.09445 |
| H                               | 3.12186  | 1.81874  | -0.02276 |
| H                               | 6.54063  | 1.48404  | -0.64787 |
| O                               | 1.73254  | -3.59551 | 0.05860  |
| O                               | -5.02091 | 2.87803  | -0.08637 |
| O                               | 5.57818  | 2.55111  | 0.78522  |
| Coordinates for Model Number 22 |          |          |          |
| C                               | -3.38903 | -1.19183 | -0.01122 |
| C                               | -2.21672 | -0.45346 | -0.01895 |
| C                               | -2.25823 | 0.95522  | 0.01461  |
| C                               | -1.07085 | 1.78611  | 0.01189  |
| C                               | -3.51223 | 1.59522  | 0.05453  |
| C                               | -4.69087 | 0.86584  | 0.06199  |
| C                               | -4.60940 | -0.52239 | 0.02949  |
| C                               | 1.33442  | 2.42612  | -0.01473 |
| C                               | 2.07859  | 0.32003  | -0.08232 |
| C                               | 0.23475  | 1.42128  | -0.02282 |
| C                               | 3.81128  | 2.22615  | -0.08732 |
| C                               | 2.99042  | -0.84282 | -0.12075 |
| C                               | 5.21161  | -1.62958 | -0.03426 |
| C                               | 2.34368  | -2.17929 | -0.33235 |
| C                               | 5.90048  | -1.91842 | 1.27135  |
| N                               | 2.48741  | 1.63873  | -0.05051 |
| N                               | 0.78304  | 0.15006  | -0.06954 |
| N                               | -5.84748 | -1.30356 | 0.03872  |
| N                               | 4.23793  | -0.62775 | 0.04558  |
| H                               | -3.37686 | -2.27545 | -0.03628 |
| H                               | -1.25412 | -0.95041 | -0.05095 |
| H                               | -3.55442 | 2.68056  | 0.08026  |
| H                               | -5.66204 | 1.34584  | 0.09213  |
| H                               | -1.23301 | 2.86276  | 0.04249  |
| H                               | 1.59797  | -2.36146 | 0.44616  |
| H                               | 1.80947  | -2.18545 | -1.28686 |
| H                               | 3.08686  | -2.97644 | -0.34150 |
| H                               | 5.16895  | -2.17567 | 2.04468  |
| H                               | 6.60915  | -2.73574 | 1.13508  |
| H                               | 6.42959  | -1.02333 | 1.61390  |
| H                               | 4.37680  | 1.97439  | 0.81132  |
| H                               | 3.65943  | 3.30655  | -0.14096 |
| H                               | 4.36709  | 1.88256  | -0.96130 |
| O                               | 1.29806  | 3.64069  | 0.01200  |
| O                               | -6.90331 | -0.68947 | 0.07397  |
| O                               | -5.74831 | -2.52113 | 0.01099  |
| O                               | 5.52469  | -2.13209 | -1.09443 |

---

| Model | RFP-derived Chromophores |                 |      |                       |          | GFP-derived Chromophores |                 |       |                       |          |
|-------|--------------------------|-----------------|------|-----------------------|----------|--------------------------|-----------------|-------|-----------------------|----------|
|       | Energy [eV]              | Wavelength (nm) | $f$  | $\delta^{\text{TPA}}$ | TPA [GM] | Energy [eV]              | Wavelength (nm) | $f$   | $\delta^{\text{TPA}}$ | TPA [GM] |
| 1a    | 2.977                    | 417             | 0.64 | 820                   | 2.66     | 3.455                    | 359             | 0.640 | 42                    | 0.19     |
| 1b    | 2.987                    | 415             | 0.61 | 618                   | 2.02     | 3.468                    | 358             | 0.679 | 15                    | 0.07     |
| 2a    | 2.968                    | 418             | 0.67 | 1335                  | 4.31     | 3.473                    | 357             | 0.652 | 13                    | 0.06     |
| 2b    | 2.995                    | 414             | 0.63 | 983                   | 3.23     | 3.452                    | 359             | 0.557 | 20                    | 0.09     |
| 3     | 2.968                    | 418             | 0.68 | 1425                  | 4.60     | 3.463                    | 358             | 0.705 | 24                    | 0.11     |
| 4     | 2.923                    | 424             | 0.75 | 1162                  | 3.64     | 3.387                    | 366             | 0.787 | 11                    | 0.05     |
| 5     | 2.945                    | 421             | 0.70 | 2062                  | 6.56     | 3.467                    | 358             | 0.704 | 180                   | 0.79     |
| 6     | 2.881                    | 430             | 0.83 | 527                   | 1.60     | 3.197                    | 388             | 0.912 | 342                   | 1.28     |
| 7     | 2.819                    | 440             | 0.88 | 450                   | 1.31     | 3.200                    | 388             | 0.927 | 339                   | 1.27     |
| 8     | 2.883                    | 430             | 0.75 | 395                   | 1.20     | 3.304                    | 375             | 0.796 | 370                   | 1.48     |
| 9     | 2.897                    | 428             | 0.82 | 4254                  | 13.09    | 3.403                    | 364             | 0.841 | 609                   | 2.59     |
| 10    | 2.898                    | 428             | 0.81 | 3776                  | 11.62    | 3.369                    | 368             | 0.848 | 763                   | 3.18     |
| 11    | 2.859                    | 434             | 0.78 | 498                   | 1.49     | 3.256                    | 381             | 0.812 | 1049                  | 4.08     |
| 12    | 2.772                    | 447             | 0.92 | 6135                  | 17.28    | 3.210                    | 386             | 0.984 | 1358                  | 5.13     |
| 13    | 2.785                    | 445             | 0.83 | 7024                  | 19.98    | 3.289                    | 377             | 0.853 | 1751                  | 6.94     |
| 14    | 2.801                    | 443             | 0.85 | 7205                  | 20.72    | 3.310                    | 375             | 0.894 | 1744                  | 7.00     |
| 15    | 2.840                    | 437             | 0.80 | 724                   | 2.14     | 3.222                    | 385             | 0.837 | 1879                  | 7.15     |
| 16a   | 2.733                    | 454             | 0.64 | 7938                  | 21.75    | 3.218                    | 385             | 0.577 | 2046                  | 7.77     |
| 16b   | 2.783                    | 446             | 0.77 | 7197                  | 20.44    | 3.260                    | 380             | 0.711 | 1882                  | 7.33     |
| 17    | 2.775                    | 447             | 0.86 | 7918                  | 22.36    | 3.284                    | 378             | 0.901 | 2067                  | 8.17     |
| 18    | 2.630                    | 471             | 0.91 | 9944                  | 25.23    | 3.137                    | 395             | 0.927 | 2540                  | 9.16     |
| 19    | 2.732                    | 454             | 0.80 | 12564                 | 34.39    | 3.138                    | 395             | 0.553 | 2908                  | 10.50    |
| 20    | 2.239                    | 554             | 0.48 | 27128                 | 49.88    | 2.689                    | 461             | 0.363 | 5738                  | 15.21    |
| 21    | 2.654                    | 467             | 0.46 | 16899                 | 43.64    | 2.985                    | 415             | 0.298 | 5258                  | 17.19    |
| 22    | 2.710                    | 458             | 0.69 | 6876                  | 18.52    | 2.965                    | 418             | 0.638 | 8834                  | 28.47    |

**Table S3** One-photon excitation energies [in eV] and the corresponding wavelengths [in nm], OPA oscillator strengths ( $f$ ), TPA transition moments ( $\delta^{\text{TPA}}$ ) and TPA cross-sections [in GM] for the transition to  $S_1$  as determined at the B3LYP/6-31G+(d,p) Level of Theory and PCM with parameters for  $\text{H}_2\text{O}$ . The properties for RFP-derived chromophores (Figure S1) are computed in this study, while the GFP-derived ones were previously reported.<sup>1</sup>

| Model | $\Delta$ Energy [eV] | $\Delta$ Wavelength (nm) | $\Delta f$ | $\Delta\delta^{\text{TPA}}$ | $\Delta$ TPA [GM] | % increase in $f$ | % increase in TPA |
|-------|----------------------|--------------------------|------------|-----------------------------|-------------------|-------------------|-------------------|
| 1a    | -0.478               | 58                       | 0.001      | 778                         | 2.48              | 0.2               | 1339.8            |
| 1b    | -0.481               | 58                       | -0.070     | 603                         | 1.96              | -10.3             | 2984.8            |
| 2a    | -0.505               | 61                       | 0.020      | 1322                        | 4.25              | 3.1               | 7356.3            |
| 2b    | -0.457               | 55                       | 0.077      | 963                         | 3.14              | 13.8              | 3630.8            |
| 3     | -0.495               | 60                       | -0.028     | 1401                        | 4.50              | -4.0              | 4243.4            |
| 4     | -0.464               | 58                       | -0.034     | 1151                        | 3.60              | -4.3              | 7951.8            |
| 5     | -0.522               | 63                       | -0.003     | 1882                        | 5.77              | -0.4              | 728.5             |
| 6     | -0.316               | 43                       | -0.084     | 184                         | 0.32              | -9.2              | 24.9              |
| 7     | -0.381               | 52                       | -0.052     | 111                         | 0.04              | -5.6              | 3.0               |
| 8     | -0.421               | 55                       | -0.049     | 25                          | -0.28             | -6.2              | -18.7             |
| 9     | -0.506               | 64                       | -0.026     | 3645                        | 10.51             | -3.1              | 406.5             |
| 10    | -0.471               | 60                       | -0.037     | 3013                        | 8.45              | -4.4              | 266.0             |
| 11    | -0.397               | 53                       | -0.031     | -551                        | -2.59             | -3.8              | -63.4             |
| 12    | -0.438               | 61                       | -0.066     | 4777                        | 12.15             | -6.7              | 236.8             |
| 13    | -0.504               | 68                       | -0.019     | 5274                        | 13.03             | -2.2              | 187.7             |
| 14    | -0.509               | 68                       | -0.042     | 5461                        | 13.72             | -4.7              | 195.9             |
| 15    | -0.382               | 52                       | -0.037     | -1155                       | -5.01             | -4.4              | -70.1             |
| 16a   | -0.485               | 68                       | 0.063      | 5892                        | 13.98             | 10.9              | 179.9             |
| 16b   | -0.477               | 65                       | 0.058      | 5315                        | 13.10             | 8.2               | 178.7             |
| 17    | -0.509               | 69                       | -0.043     | 5851                        | 14.18             | -4.8              | 173.5             |
| 18    | -0.507               | 76                       | -0.016     | 7404                        | 16.06             | -1.7              | 175.3             |
| 19    | -0.406               | 59                       | 0.242      | 9655                        | 23.89             | 43.8              | 227.5             |
| 20    | -0.450               | 93                       | 0.118      | 21391                       | 34.67             | 32.5              | 227.9             |
| 21    | -0.331               | 52                       | 0.165      | 11641                       | 26.46             | 55.4              | 154.0             |
| 22    | -0.255               | 39                       | 0.051      | -1958                       | -9.95             | 8.0               | -35.0             |

**Table S4** Differences between the properties computed for the RFP-derived chromophore and those previously computed for the corresponding GFP-derived chromophore for the transition to  $S_1$  as in Table S3.

| Model | B3LYP       |                 |      |                       |          | CAM-B3LYP   |                 |      |                       |          |
|-------|-------------|-----------------|------|-----------------------|----------|-------------|-----------------|------|-----------------------|----------|
|       | Energy [eV] | Wavelength (nm) | $f$  | $\delta^{\text{TPA}}$ | TPA [GM] | Energy [eV] | Wavelength (nm) | $f$  | $\delta^{\text{TPA}}$ | TPA [GM] |
| 1a    | 3.032       | 409             | 0.53 | 1042                  | 3.51     | 3.384       | 366             | 0.66 | 616                   | 2.59     |
| 2a    | 3.050       | 407             | 0.51 | 661                   | 2.25     | 3.371       | 368             | 0.70 | 1025                  | 4.27     |
| 1b    | 3.016       | 411             | 0.55 | 1580                  | 5.27     | -           | -               | -    | -                     | -        |
| 2b    | 3.059       | 405             | 0.51 | 779                   | 2.67     | 3.400       | 365             | 0.64 | 474                   | 2.01     |
| 3     | 3.023       | 410             | 0.56 | 1708                  | 5.72     | 3.371       | 368             | 0.70 | 1017                  | 4.23     |
| 4     | 2.982       | 416             | 0.63 | 1445                  | 4.71     | 3.323       | 373             | 0.77 | 917                   | 3.71     |
| 5     | 2.991       | 415             | 0.56 | 2551                  | 8.37     | 3.374       | 368             | 0.76 | 1049                  | 4.38     |
| 6     | 2.949       | 420             | 0.68 | 1175                  | 3.75     | 3.339       | 371             | 0.86 | 254                   | 1.04     |
| 7     | 2.890       | 429             | 0.76 | 1033                  | 3.16     | 3.256       | 381             | 0.90 | 474                   | 1.84     |
| 8     | 2.959       | 419             | 0.64 | 756                   | 2.43     | 3.304       | 375             | 0.77 | 417                   | 1.67     |
| 9     | 2.962       | 419             | 0.66 | 4240                  | 13.64    | 3.305       | 375             | 0.81 | 2846                  | 11.40    |
| 10    | 2.956       | 419             | 0.67 | 4546                  | 14.57    | 3.315       | 374             | 0.80 | 2213                  | 8.92     |
| 11    | 2.931       | 423             | 0.66 | 737                   | 2.32     | 3.283       | 378             | 0.80 | 469                   | 1.85     |
| 12    | 2.857       | 434             | 0.76 | 6134                  | 18.36    | 3.206       | 387             | 0.90 | 3850                  | 14.51    |
| 13    | 2.872       | 432             | 0.67 | 7243                  | 21.91    | 3.219       | 385             | 0.81 | 5051                  | 19.19    |
| 14    | 2.874       | 431             | 0.70 | 7581                  | 22.96    | 3.225       | 385             | 0.85 | 5156                  | 19.66    |
| 15    | 2.915       | 425             | 0.68 | 719                   | 2.24     | 3.274       | 379             | 0.83 | 351                   | 1.38     |
| 16a   | 2.832       | 438             | 0.52 | 8071                  | 23.73    | 3.242       | 382             | 0.73 | 4465                  | 17.21    |
| 16b   | 2.901       | 428             | 0.62 | 6914                  | 21.33    | 3.277       | 378             | 0.78 | 3915                  | 15.42    |
| 17    | 2.854       | 435             | 0.70 | 8271                  | 24.70    | 3.204       | 387             | 0.85 | 5764                  | 21.69    |
| 18    | 2.777       | 446             | 0.73 | 10315                 | 29.18    | 3.119       | 398             | 0.89 | 8115                  | 28.95    |
| 19    | 2.841       | 436             | 0.69 | 12303                 | 36.42    | 3.251       | 381             | 0.99 | 5278                  | 20.45    |
| 20    | 2.366       | 524             | 0.39 | 28912                 | 59.35    | 2.869       | 432             | 0.65 | 14550                 | 43.93    |
| 21    | 2.718       | 456             | 0.29 | 16415                 | 44.46    | 3.296       | 376             | 0.92 | 3756                  | 14.96    |
| 22    | 2.881       | 430             | 0.60 | 3171                  | 9.65     | 3.276       | 378             | 0.75 | 754                   | 2.97     |

**Table S5** One-photon excitation energies [in eV] and the corresponding wavelengths [in nm], OPA oscillator strengths ( $f$ ), TPA transition moments ( $\delta^{\text{TPA}}$ ) and TPA cross-sections [in GM] for the transition to  $S_1$  as determined at the B3LYP and CAM-B3LYP/6-31G+(d,p) Level of Theory in the gas phase for the RFP-derived chromophores given in Figure S1.

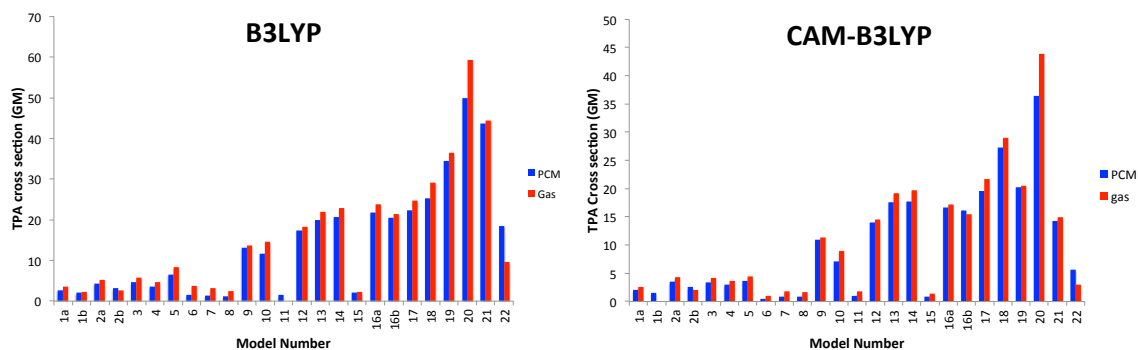

**Fig. S2** A visual representation for the TPA cross sections computed in the gas phase for the RFP-derived chromophores as given in Table S5 with the corresponding PCM values as given in Tables S3 and S7.

| Model | B3LYP    |         |                  |                 |                | CAM-B3LYP |         |                  |                 |                |
|-------|----------|---------|------------------|-----------------|----------------|-----------|---------|------------------|-----------------|----------------|
|       | 2LM (GM) | QR (GM) | $\Delta\mu$ (au) | $\mu_{01}$ (au) | $\cos^2\theta$ | 2LM (GM)  | QR (GM) | $\Delta\mu$ (au) | $\mu_{01}$ (au) | $\cos^2\theta$ |
| 1a    | 1.70     | 3.51    | 0.88             | 2.67            | 0.03           | 0.85      | 2.03    | 0.60             | 2.83            | 0.01           |
| 1b    | 1.16     | 2.25    | 0.77             | 2.60            | 0.00           | 0.60      | 1.50    | 0.52             | 2.75            | 0.00           |
| 2a    | 2.54     | 5.27    | 0.99             | 2.73            | 0.10           | 1.61      | 3.52    | 0.72             | 2.90            | 0.14           |
| 2b    | 1.38     | 2.67    | 0.82             | 2.61            | 0.03           | 0.66      | 2.55    | 0.53             | 2.77            | 0.02           |
| 3     | 0.00     | 5.72    | 0.05             | 0.02            | 0.09           | 0.00      | 3.42    | 0.05             | 0.02            | 0.00           |
| 4     | 0.00     | 4.71    | 0.17             | 0.06            | 0.00           | 0.00      | 2.94    | 0.19             | 0.06            | 0.00           |
| 5     | 0.00     | 8.37    | 1.09             | 0.03            | 0.02           | 0.00      | 3.69    | 0.69             | 0.07            | 0.00           |
| 6     | 3.95     | 3.75    | 0.88             | 3.06            | 0.45           | 0.44      | 0.49    | 0.38             | 3.25            | 0.00           |
| 7     | 2.18     | 3.16    | 0.70             | 3.27            | 0.21           | 0.85      | 0.89    | 0.51             | 3.35            | 0.00           |
| 8     | 1.36     | 2.43    | 0.73             | 2.96            | 0.00           | 0.73      | 0.80    | 0.51             | 3.09            | 0.02           |
| 9     | 11.26    | 13.64   | 1.41             | 3.02            | 0.58           | 7.80      | 10.97   | 1.07             | 3.16            | 0.67           |
| 10    | 0.06     | 14.57   | 3.53             | 0.12            | 0.00           | 0.03      | 7.13    | 2.60             | 0.12            | 0.00           |
| 11    | 1.83     | 2.32    | 0.81             | 3.03            | 0.03           | 0.81      | 0.94    | 0.55             | 3.03            | 0.00           |
| 12    | 18.50    | 18.36   | 1.54             | 3.29            | 0.75           | 11.18     | 13.94   | 1.16             | 3.29            | 0.82           |
| 13    | 22.63    | 21.91   | 1.81             | 3.09            | 0.76           | 15.98     | 17.62   | 1.46             | 3.09            | 0.85           |
| 14    | 23.29    | 22.96   | 1.80             | 3.15            | 0.75           | 15.84     | 17.69   | 1.43             | 3.15            | 0.84           |
| 15    | 3.11     | 2.24    | 0.86             | 3.09            | 0.26           | 1.22      | 0.92    | 0.58             | 3.09            | 0.16           |
| 16a   | 41.99    | 23.73   | 2.66             | 2.72            | 0.88           | 15.34     | 16.62   | 1.61             | 2.72            | 0.87           |
| 16b   | 24.26    | 21.33   | 1.87             | 2.96            | 0.87           | 11.08     | 16.14   | 1.28             | 2.96            | 0.84           |
| 17    | 25.86    | 24.70   | 1.87             | 3.17            | 0.77           | 18.29     | 19.58   | 1.52             | 3.17            | 0.86           |
| 18    | 33.00    | 29.18   | 2.02             | 3.27            | 0.81           | 27.11     | 27.28   | 1.77             | 3.27            | 0.90           |
| 19    | 65.60    | 36.42   | 2.78             | 3.15            | 0.98           | 14.89     | 20.30   | 1.36             | 3.15            | 0.90           |
| 20    | 98.51    | 59.35   | 4.26             | 2.59            | 0.90           | 65.57     | 36.39   | 2.96             | 3.04            | 0.89           |
| 21    | 105.19   | 44.46   | 5.35             | 2.08            | 0.97           | 13.86     | 14.28   | 1.22             | 3.37            | 0.91           |
| 22    | 19.38    | 9.65    | 1.70             | 2.92            | 0.85           | 5.61      | 5.65    | 0.93             | 3.06            | 0.71           |

**Table S6** TPA cross sections via the truncated SOS approach using 2 states; i.e. the 2-level model (2LM), and via quadratic response (QR), and the contributing components to the 2LM expression ((Equation 5 in the main text)) determined at the B3LYP and CAM-B3LYP/6-31+G(d,p) levels of theory in the gas phase.



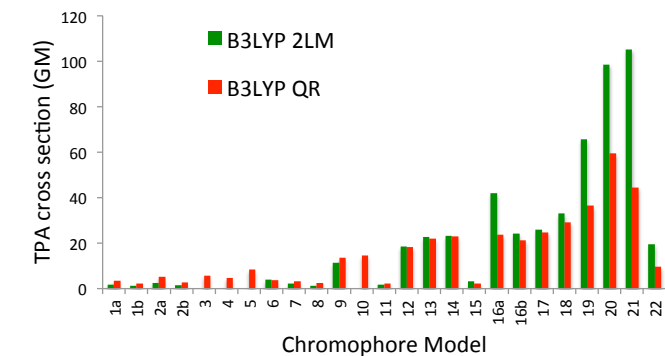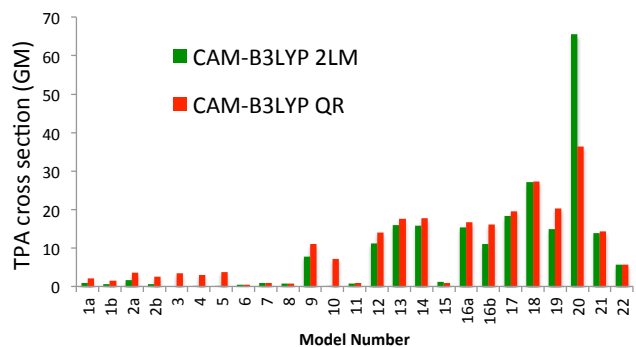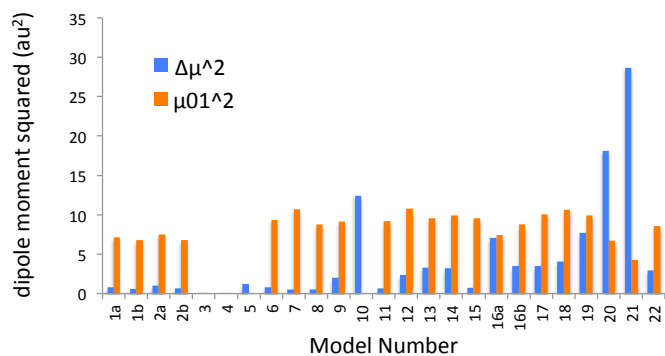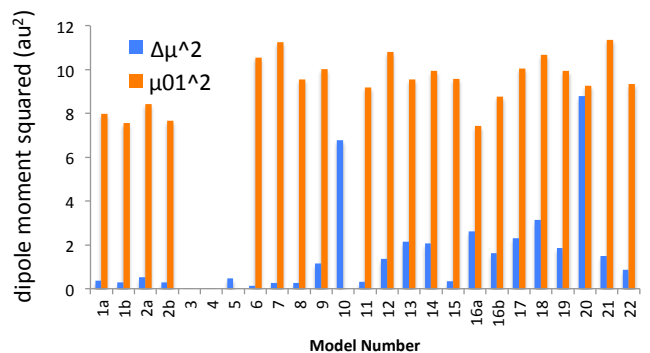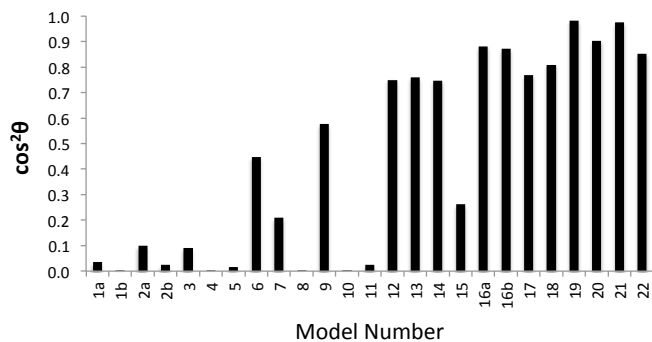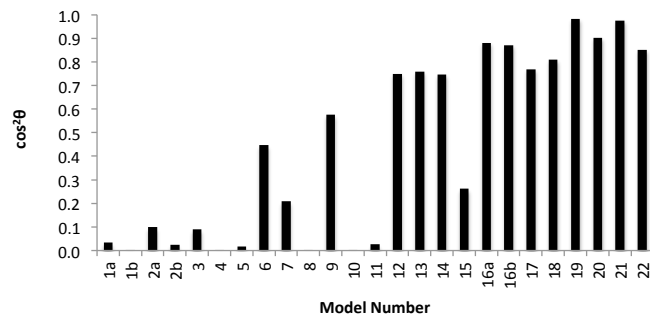

**Fig. S3** Plots for the B3LYP (left) and CAM-B3LYP (right) data given in Table S6. Top figures compare the TPA cross sections computed via quadratic response (QR) to those obtained from the 2LM approximation. Middle figures compare the magnitudes of the transition dipole moment ( $\mu_{01}$ ) and the difference between permanent moments of excited and ground states ( $\Delta\mu$ ). The alignment between the  $\mu_{01}$  and  $\Delta\mu$  vectors is plotted in the bottom figures in terms of  $\cos^2\theta$  (the vectors are perfectly aligned when  $\cos^2\theta = 1$ ).

| Model | RFP-derived Chromophores |                 |      |                       |          | GFP-derived Chromophores |                 |       |                       |          |
|-------|--------------------------|-----------------|------|-----------------------|----------|--------------------------|-----------------|-------|-----------------------|----------|
|       | Energy [eV]              | Wavelength (nm) | $f$  | $\delta^{\text{TPA}}$ | TPA [GM] | Energy [eV]              | Wavelength (nm) | $f$   | $\delta^{\text{TPA}}$ | TPA [GM] |
| 1a    | 3.306                    | 375             | 0.78 | 507                   | 2.03     | 3.707                    | 334             | 0.730 | 1                     | 0.01     |
| 1b    | 3.312                    | 374             | 0.74 | 372                   | 1.50     | 3.714                    | 334             | 0.720 | 11                    | 0.06     |
| 2a    | 3.295                    | 376             | 0.81 | 884                   | 3.52     | 3.702                    | 335             | 0.743 | 76                    | 0.38     |
| 2b    | 3.315                    | 374             | 0.76 | 634                   | 2.55     | 3.705                    | 335             | 0.752 | 33                    | 0.17     |
| 3     | 3.292                    | 377             | 0.81 | 862                   | 3.42     | 3.695                    | 336             | 0.769 | 76                    | 0.38     |
| 4     | 3.242                    | 383             | 0.89 | 763                   | 2.94     | 3.625                    | 342             | 0.853 | 19                    | 0.09     |
| 5     | 3.292                    | 377             | 0.87 | 929                   | 3.69     | 3.688                    | 336             | 0.758 | 263                   | 1.31     |
| 6     | 3.246                    | 382             | 0.98 | 126                   | 0.49     | 3.506                    | 354             | 0.994 | 146                   | 0.66     |
| 7     | 3.168                    | 391             | 1.01 | 242                   | 0.89     | 3.508                    | 353             | 1.009 | 150                   | 0.68     |
| 8     | 3.212                    | 386             | 0.89 | 211                   | 0.80     | 3.573                    | 347             | 0.883 | 85                    | 0.40     |
| 9     | 3.215                    | 386             | 0.95 | 2894                  | 10.97    | 3.624                    | 342             | 0.889 | 688                   | 3.31     |
| 10    | 3.235                    | 383             | 0.93 | 1860                  | 7.13     | 3.625                    | 342             | 0.889 | 454                   | 2.19     |
| 11    | 3.194                    | 388             | 0.93 | 252                   | 0.94     | 3.544                    | 350             | 0.906 | 166                   | 0.76     |
| 12    | 3.103                    | 400             | 1.05 | 3949                  | 13.94    | 3.466                    | 358             | 1.029 | 1252                  | 5.51     |
| 13    | 3.112                    | 398             | 0.97 | 4963                  | 17.62    | 3.522                    | 352             | 0.900 | 1623                  | 7.38     |
| 14    | 3.131                    | 396             | 0.99 | 4922                  | 17.69    | 3.542                    | 350             | 0.938 | 1609                  | 7.40     |
| 15    | 3.183                    | 390             | 0.95 | 249                   | 0.92     | 3.525                    | 352             | 0.941 | 379                   | 1.73     |
| 16a   | 3.127                    | 397             | 0.87 | 4636                  | 16.62    | 3.537                    | 351             | 0.789 | 1483                  | 6.80     |
| 16b   | 3.147                    | 394             | 0.93 | 4443                  | 16.14    | 3.548                    | 349             | 0.852 | 1424                  | 6.58     |
| 17    | 3.106                    | 399             | 1.00 | 5536                  | 19.58    | 3.517                    | 353             | 0.948 | 1882                  | 8.54     |
| 18    | 2.950                    | 420             | 1.07 | 8551                  | 27.28    | 3.364                    | 369             | 0.988 | 2953                  | 12.25    |
| 19    | 3.142                    | 395             | 1.16 | 5606                  | 20.30    | 3.511                    | 353             | 0.999 | 1458                  | 6.59     |
| 20    | 2.730                    | 454             | 0.77 | 13314                 | 36.39    | 3.139                    | 395             | 0.630 | 3413                  | 12.33    |
| 21    | 3.198                    | 388             | 1.06 | 3808                  | 14.28    | 3.535                    | 351             | 0.871 | 1301                  | 5.96     |
| 22    | 3.140                    | 395             | 0.88 | 1564                  | 5.65     | 3.432                    | 361             | 0.862 | 2579                  | 11.14    |

**Table S7** One-photon excitation energies [in eV] and the corresponding wavelengths [in nm], OPA oscillator strengths ( $f$ ), TPA transition moments ( $\delta^{\text{TPA}}$ ) and TPA cross-sections [in GM] for the transition to  $S_1$  as determined at the CAM-B3LYP/6-31G+(d,p) Level of Theory and PCM with parameters for  $\text{H}_2\text{O}$ . Models for the RFP-derived chromophores are given in Figure S1. Equivalent GFP-derived chromophores are given in Figure 2 of our previous study.<sup>1</sup>

| Model | $\Delta$ Energy [eV] | $\Delta$ Wavelength (nm) | $\Delta f$ | $\Delta\delta^{\text{TPA}}$ | $\Delta$ TPA [GM] | % increase in $f$ | % increase in TPA |
|-------|----------------------|--------------------------|------------|-----------------------------|-------------------|-------------------|-------------------|
| 1a    | -0.402               | 41                       | 0.048      | 506                         | 2.03              | 6.6               | 28419.8           |
| 1b    | -0.402               | 41                       | 0.019      | 361                         | 1.44              | 2.6               | 2603.6            |
| 2a    | -0.407               | 41                       | 0.071      | 808                         | 3.14              | 9.6               | 818.1             |
| 2b    | -0.390               | 39                       | 0.012      | 601                         | 2.39              | 1.6               | 1439.5            |
| 3     | -0.403               | 41                       | 0.041      | 786                         | 3.04              | 5.3               | 805.1             |
| 4     | -0.383               | 40                       | 0.036      | 745                         | 2.85              | 4.2               | 3120.5            |
| 5     | -0.397               | 41                       | 0.116      | 666                         | 2.38              | 15.3              | 181.6             |
| 6     | -0.260               | 28                       | -0.013     | -20                         | -0.17             | -1.3              | -26.0             |
| 7     | -0.341               | 38                       | -0.002     | 92                          | 0.22              | -0.2              | 31.9              |
| 8     | -0.361               | 39                       | 0.008      | 126                         | 0.40              | 0.9               | 101.1             |
| 9     | -0.408               | 43                       | 0.060      | 2206                        | 7.66              | 6.7               | 231.0             |
| 10    | -0.391               | 41                       | 0.037      | 1405                        | 4.94              | 4.2               | 225.8             |
| 11    | -0.350               | 38                       | 0.019      | 86                          | 0.18              | 2.1               | 23.2              |
| 12    | -0.363               | 42                       | 0.016      | 2697                        | 8.43              | 1.6               | 152.9             |
| 13    | -0.410               | 46                       | 0.065      | 3340                        | 10.24             | 7.2               | 138.8             |
| 14    | -0.411               | 46                       | 0.050      | 3314                        | 10.29             | 5.3               | 139.0             |
| 15    | -0.342               | 38                       | 0.006      | -130                        | -0.80             | 0.6               | -46.5             |
| 16a   | -0.410               | 46                       | 0.080      | 3153                        | 9.82              | 10.1              | 144.3             |
| 16b   | -0.401               | 45                       | 0.081      | 3019                        | 9.56              | 9.5               | 145.4             |
| 17    | -0.412               | 47                       | 0.049      | 3654                        | 11.04             | 5.2               | 129.3             |
| 18    | -0.415               | 52                       | 0.081      | 5598                        | 15.02             | 8.2               | 122.6             |
| 19    | -0.369               | 41                       | 0.156      | 4149                        | 13.71             | 15.6              | 208.1             |
| 20    | -0.408               | 59                       | 0.138      | 9900                        | 24.06             | 21.9              | 195.2             |
| 21    | -0.338               | 37                       | 0.189      | 2506                        | 8.31              | 21.7              | 139.4             |
| 22    | -0.292               | 34                       | 0.020      | -1016                       | -5.49             | 2.3               | -49.2             |

**Table S8** Differences between the properties computed for the RFP-derived chromophore and those previously computed for the corresponding GFP-derived chromophore for the transition to  $S_1$  as in Table S7.

---

| Model | B3LYP | CAM-B3LYP |
|-------|-------|-----------|
| 1a    | 0.804 | 0.801     |
| 1b    | 0.804 | 0.799     |
| 2a    | 0.802 | 0.796     |
| 2b    | 0.804 | 0.798     |
| 3     | 0.803 | 0.797     |
| 4     | 0.807 | 0.801     |
| 5     | 0.788 | 0.787     |
| 6     | 0.791 | 0.788     |
| 7     | 0.803 | 0.796     |
| 8     | 0.811 | 0.807     |
| 9     | 0.787 | 0.775     |
| 10    | 0.793 | 0.780     |
| 11    | 0.808 | 0.804     |
| 12    | 0.776 | 0.755     |
| 13    | 0.756 | 0.738     |
| 14    | 0.764 | 0.748     |
| 15    | 0.804 | 0.801     |
| 16a   | 0.722 | 0.716     |
| 16b   | 0.730 | 0.715     |
| 17    | 0.757 | 0.740     |
| 18    | 0.712 | 0.690     |
| 19    | 0.738 | 0.726     |
| 20    | 0.615 | 0.608     |
| 21    | 0.660 | 0.670     |
| 22    | 0.738 | 0.743     |

**Table S9** The  $\Lambda$ -diagnostic for the first excited state computed at the B3LYP and CAM-B3LYP/6-31+G(d,p) level of theory in PCM (H<sub>2</sub>O) for the RFP-derived models (see Figure S1).

**Table S10** One-photon excitation energies [in eV] and the corresponding wavelengths [in nm], OPA oscillator strengths ( $f$ ), TPA transition moments ( $\delta^{\text{TPA}}$ ) and TPA cross-sections [in GM] for the transition to  $S_1$  as determined at the B3LYP/6-31G+(d,p) Level of Theory (except where noted) and PCM with parameters for  $\text{H}_2\text{O}$ . The properties are computed for the RFP-derived chromophores (Figure S1) at varying Acylimine dihedral angle ( $\theta_{\text{acylimine}}$ ).

| Model | $\theta_{\text{acylimine}}$ | Energy [eV] | Wavelength [nm] | $f$   | $\delta^{\text{TPA}}$ | TPA [GM] |
|-------|-----------------------------|-------------|-----------------|-------|-----------------------|----------|
| 13    | 0°                          | 2.526       | 491             | 0.717 | 15955                 | 37.33    |
|       | 10°                         | 2.559       | 484             | 0.735 | 14871                 | 35.72    |
|       | 20°                         | 2.597       | 477             | 0.750 | 13483                 | 33.35    |
|       | 30°                         | 2.636       | 470             | 0.767 | 12077                 | 30.77    |
|       | 40°                         | 2.678       | 463             | 0.785 | 10597                 | 27.87    |
|       | 50°                         | 2.720       | 456             | 0.804 | 9181                  | 24.91    |
|       | 60°                         | 2.756       | 450             | 0.820 | 7974                  | 22.21    |
|       | 70°                         | 2.787       | 445             | 0.835 | 6957                  | 19.81    |
|       | 80°                         | 2.809       | 441             | 0.844 | 6246                  | 18.07    |
|       | 90°                         | 2.819       | 440             | 0.848 | 5921                  | 17.25    |
|       | 100°                        | 2.814       | 441             | 0.843 | 6057                  | 17.58    |
|       | 110°                        | 2.791       | 444             | 0.833 | 6782                  | 19.37    |
|       | 120°                        | 2.750       | 451             | 0.815 | 8151                  | 22.60    |
|       | 130°                        | 2.693       | 461             | 0.794 | 10149                 | 26.98    |
|       | 140°                        | 2.630       | 471             | 0.775 | 12329                 | 31.27    |
|       | 150°                        | 2.571       | 482             | 0.757 | 14133                 | 34.25    |
|       | 160°                        | 2.539       | 488             | 0.746 | 15096                 | 35.67    |
|       | 170°                        | 2.524       | 491             | 0.739 | 15669                 | 36.61    |
|       | 180°                        | 2.525       | 491             | 0.735 | 15945                 | 37.29    |
|       | 190°                        | 2.535       | 489             | 0.734 | 16150                 | 38.06    |
|       | 200°                        | 2.565       | 483             | 0.736 | 15796                 | 38.12    |
|       | 210°                        | 2.628       | 472             | 0.751 | 14012                 | 35.50    |
|       | 220°                        | 2.703       | 459             | 0.779 | 11469                 | 30.72    |
|       | 230°                        | 2.772       | 447             | 0.818 | 8936                  | 25.17    |
|       | 240°                        | 2.828       | 438             | 0.866 | 6781                  | 19.88    |
|       | 250°                        | 2.856       | 434             | 0.900 | 5653                  | 16.91    |
|       | 260°                        | 2.849       | 435             | 0.899 | 5813                  | 17.31    |
|       | 270°                        | 2.809       | 441             | 0.864 | 7244                  | 20.96    |
|       | 280°                        | 2.750       | 451             | 0.819 | 9374                  | 26.00    |
|       | 290°                        | 2.685       | 462             | 0.780 | 11783                 | 31.14    |
|       | 300°                        | 2.619       | 473             | 0.746 | 14080                 | 35.41    |
|       | 310°                        | 2.563       | 484             | 0.720 | 15802                 | 38.05    |
|       | 320°                        | 2.523       | 491             | 0.702 | 16666                 | 38.90    |
|       | 330°                        | 2.497       | 497             | 0.686 | 16886                 | 38.60    |
|       | 340°                        | 2.490       | 498             | 0.677 | 16538                 | 37.59    |
| 350°  | 2.500                       | 496         | 0.690           | 16386 | 37.54                 |          |
| 14    | 0°                          | 2.544       | 487             | 0.725 | 16363                 | 38.82    |
|       | 10°                         | 2.577       | 481             | 0.746 | 15350                 | 37.38    |
|       | 20°                         | 2.615       | 474             | 0.763 | 13884                 | 34.81    |
|       | 30°                         | 2.655       | 467             | 0.781 | 12406                 | 32.06    |
|       | 40°                         | 2.698       | 460             | 0.801 | 10856                 | 28.97    |
|       | 50°                         | 2.740       | 453             | 0.821 | 9394                  | 25.86    |
|       | 60°                         | 2.778       | 446             | 0.840 | 8092                  | 22.90    |
|       | 70°                         | 2.809       | 441             | 0.856 | 7031                  | 20.34    |
| 80°   | 2.831                       | 438         | 0.866           | 6284  | 18.47                 |          |

---

|      |       |     |       |       |       |
|------|-------|-----|-------|-------|-------|
| 90°  | 2.840 | 437 | 0.870 | 5980  | 17.68 |
| 100° | 2.834 | 438 | 0.867 | 6160  | 18.13 |
| 110° | 2.812 | 441 | 0.856 | 6869  | 19.92 |
| 120° | 2.774 | 447 | 0.838 | 8196  | 23.12 |
| 130° | 2.720 | 456 | 0.816 | 10119 | 27.44 |
| 140° | 2.659 | 466 | 0.794 | 12277 | 31.82 |
| 150° | 2.599 | 477 | 0.772 | 14205 | 35.18 |
| 160° | 2.566 | 483 | 0.759 | 15230 | 36.76 |
| 170° | 2.545 | 487 | 0.750 | 16004 | 38.02 |
| 180° | 2.540 | 488 | 0.746 | 16559 | 39.17 |
| 190° | 2.555 | 485 | 0.748 | 16481 | 39.44 |
| 200° | 2.600 | 477 | 0.758 | 15426 | 38.23 |
| 210° | 2.662 | 466 | 0.778 | 13524 | 35.15 |
| 220° | 2.730 | 454 | 0.806 | 11193 | 30.58 |
| 230° | 2.797 | 443 | 0.847 | 8679  | 24.89 |
| 240° | 2.849 | 435 | 0.892 | 6646  | 19.79 |
| 250° | 2.875 | 431 | 0.923 | 5619  | 17.03 |
| 260° | 2.869 | 432 | 0.922 | 5847  | 17.64 |
| 270° | 2.831 | 438 | 0.889 | 7208  | 21.18 |
| 280° | 2.775 | 447 | 0.847 | 9302  | 26.26 |
| 290° | 2.710 | 458 | 0.805 | 11724 | 31.58 |
| 300° | 2.647 | 468 | 0.770 | 13972 | 35.89 |
| 310° | 2.591 | 479 | 0.741 | 15747 | 38.76 |
| 320° | 2.549 | 487 | 0.718 | 16733 | 39.85 |
| 330° | 2.521 | 492 | 0.697 | 16908 | 39.42 |
| 340° | 2.511 | 494 | 0.674 | 16444 | 38.00 |
| 350° | 2.519 | 492 | 0.684 | 16258 | 37.84 |

|     |      |       |     |       |       |       |
|-----|------|-------|-----|-------|-------|-------|
| 16a | 0°   | 2.482 | 500 | 0.571 | 17136 | 38.71 |
|     | 10°  | 2.513 | 493 | 0.580 | 15911 | 36.85 |
|     | 20°  | 2.550 | 486 | 0.589 | 14462 | 34.47 |
|     | 30°  | 2.589 | 479 | 0.599 | 12964 | 31.85 |
|     | 40°  | 2.632 | 471 | 0.611 | 11389 | 28.92 |
|     | 50°  | 2.674 | 464 | 0.623 | 9903  | 25.97 |
|     | 60°  | 2.712 | 457 | 0.632 | 8630  | 23.27 |
|     | 70°  | 2.740 | 453 | 0.639 | 7652  | 21.07 |
|     | 80°  | 2.762 | 449 | 0.644 | 6944  | 19.42 |
|     | 90°  | 2.773 | 447 | 0.646 | 6618  | 18.65 |
|     | 100° | 2.767 | 448 | 0.643 | 6801  | 19.09 |
|     | 110° | 2.744 | 452 | 0.636 | 7543  | 20.82 |
|     | 120° | 2.702 | 459 | 0.627 | 8868  | 23.73 |
|     | 130° | 2.652 | 468 | 0.616 | 10729 | 27.66 |
|     | 140° | 2.585 | 480 | 0.603 | 12933 | 31.69 |
|     | 150° | 2.531 | 490 | 0.592 | 14798 | 34.76 |
|     | 160° | 2.494 | 497 | 0.584 | 16020 | 36.55 |
|     | 170° | 2.476 | 501 | 0.580 | 16803 | 37.77 |
|     | 180° | 2.472 | 502 | 0.577 | 17234 | 38.60 |
|     | 190° | 2.480 | 500 | 0.577 | 17437 | 39.33 |
|     | 200° | 2.526 | 491 | 0.584 | 16337 | 38.22 |
|     | 210° | 2.596 | 478 | 0.600 | 14059 | 34.74 |
|     | 220° | 2.667 | 465 | 0.619 | 11659 | 30.40 |
|     | 230° | 2.736 | 453 | 0.646 | 9174  | 25.18 |

|     |      |       |     |       |       |       |
|-----|------|-------|-----|-------|-------|-------|
|     | 240° | 2.789 | 445 | 0.674 | 7245  | 20.66 |
|     | 250° | 2.814 | 441 | 0.691 | 6287  | 18.26 |
|     | 260° | 2.807 | 442 | 0.688 | 6479  | 18.72 |
|     | 270° | 2.768 | 448 | 0.667 | 7813  | 21.94 |
|     | 280° | 2.713 | 457 | 0.642 | 9792  | 26.43 |
|     | 290° | 2.648 | 468 | 0.616 | 12117 | 31.15 |
|     | 300° | 2.583 | 480 | 0.595 | 14449 | 35.36 |
|     | 310° | 2.528 | 490 | 0.578 | 16321 | 38.25 |
|     | 320° | 2.487 | 499 | 0.567 | 17500 | 39.69 |
|     | 330° | 2.464 | 503 | 0.560 | 18032 | 40.13 |
|     | 340° | 2.451 | 506 | 0.555 | 18137 | 39.96 |
|     | 350° | 2.459 | 504 | 0.560 | 17859 | 39.59 |
| 16b | 0°   | 2.515 | 493 | 0.667 | 16785 | 38.94 |
|     | 10°  | 2.547 | 487 | 0.682 | 15740 | 37.43 |
|     | 20°  | 2.585 | 480 | 0.696 | 14282 | 34.99 |
|     | 30°  | 2.627 | 472 | 0.711 | 12710 | 32.17 |
|     | 40°  | 2.670 | 464 | 0.727 | 11182 | 29.24 |
|     | 50°  | 2.714 | 457 | 0.744 | 9659  | 26.09 |
|     | 60°  | 2.753 | 450 | 0.759 | 8317  | 23.12 |
|     | 70°  | 2.785 | 445 | 0.771 | 7246  | 20.61 |
|     | 80°  | 2.805 | 442 | 0.777 | 6565  | 18.95 |
|     | 90°  | 2.813 | 441 | 0.780 | 6279  | 18.22 |
|     | 100° | 2.807 | 442 | 0.777 | 6460  | 18.67 |
|     | 110° | 2.784 | 445 | 0.769 | 7197  | 20.46 |
|     | 120° | 2.744 | 452 | 0.755 | 8564  | 23.64 |
|     | 130° | 2.688 | 461 | 0.737 | 10500 | 27.82 |
|     | 140° | 2.627 | 472 | 0.721 | 12612 | 31.91 |
|     | 150° | 2.572 | 482 | 0.706 | 14369 | 34.84 |
|     | 160° | 2.539 | 488 | 0.696 | 15452 | 36.52 |
|     | 170° | 2.514 | 493 | 0.686 | 16463 | 38.16 |
|     | 180° | 2.509 | 494 | 0.681 | 16963 | 39.16 |
|     | 190° | 2.523 | 492 | 0.681 | 16992 | 39.65 |
|     | 200° | 2.566 | 483 | 0.689 | 16032 | 38.71 |
|     | 210° | 2.633 | 471 | 0.707 | 14021 | 35.64 |
|     | 220° | 2.703 | 459 | 0.731 | 11634 | 31.18 |
|     | 230° | 2.770 | 448 | 0.764 | 9172  | 25.81 |
|     | 240° | 2.824 | 439 | 0.805 | 7090  | 20.73 |
|     | 250° | 2.850 | 435 | 0.831 | 6019  | 17.93 |
|     | 260° | 2.842 | 436 | 0.827 | 6233  | 18.46 |
|     | 270° | 2.804 | 442 | 0.798 | 7570  | 21.83 |
|     | 280° | 2.747 | 451 | 0.762 | 9679  | 26.78 |
|     | 290° | 2.683 | 462 | 0.729 | 12030 | 31.76 |
|     | 300° | 2.618 | 474 | 0.700 | 14336 | 36.04 |
|     | 310° | 2.563 | 484 | 0.677 | 16122 | 38.82 |
|     | 320° | 2.522 | 492 | 0.662 | 17116 | 39.92 |
|     | 330° | 2.495 | 497 | 0.648 | 17483 | 39.90 |
|     | 340° | 2.485 | 499 | 0.637 | 17267 | 39.09 |
|     | 350° | 2.493 | 497 | 0.645 | 17060 | 38.88 |
| 17  | 0°   | 2.520 | 492 | 0.737 | 17470 | 40.68 |
|     | 10°  | 2.552 | 486 | 0.753 | 16331 | 38.99 |

---

|      |       |     |       |       |       |
|------|-------|-----|-------|-------|-------|
| 20°  | 2.591 | 479 | 0.770 | 14797 | 36.41 |
| 30°  | 2.631 | 471 | 0.789 | 13272 | 33.68 |
| 40°  | 2.675 | 464 | 0.810 | 11596 | 30.42 |
| 50°  | 2.718 | 456 | 0.831 | 10044 | 27.20 |
| 60°  | 2.753 | 450 | 0.848 | 8798  | 24.45 |
| 70°  | 2.785 | 445 | 0.864 | 7682  | 21.84 |
| 80°  | 2.806 | 442 | 0.875 | 6934  | 20.02 |
| 90°  | 2.816 | 440 | 0.879 | 6597  | 19.18 |
| 100° | 2.811 | 441 | 0.876 | 6754  | 19.57 |
| 110° | 2.789 | 445 | 0.864 | 7521  | 21.45 |
| 120° | 2.747 | 451 | 0.845 | 9009  | 24.93 |
| 130° | 2.692 | 461 | 0.823 | 11033 | 29.32 |
| 140° | 2.633 | 471 | 0.801 | 13211 | 33.58 |
| 150° | 2.574 | 482 | 0.780 | 15165 | 36.83 |
| 160° | 2.542 | 488 | 0.768 | 16146 | 38.27 |
| 170° | 2.520 | 492 | 0.758 | 17016 | 39.61 |
| 180° | 2.518 | 492 | 0.754 | 17381 | 40.40 |
| 190° | 2.530 | 490 | 0.755 | 17491 | 41.04 |
| 200° | 2.571 | 482 | 0.763 | 16636 | 40.33 |
| 210° | 2.634 | 471 | 0.781 | 14747 | 37.51 |
| 220° | 2.702 | 459 | 0.809 | 12316 | 32.98 |
| 230° | 2.769 | 448 | 0.849 | 9723  | 27.34 |
| 240° | 2.825 | 439 | 0.900 | 7463  | 21.84 |
| 250° | 2.852 | 435 | 0.934 | 6317  | 18.85 |
| 260° | 2.844 | 436 | 0.930 | 6547  | 19.42 |
| 270° | 2.806 | 442 | 0.896 | 8004  | 23.11 |
| 280° | 2.749 | 451 | 0.852 | 10232 | 28.36 |
| 290° | 2.685 | 462 | 0.809 | 12758 | 33.72 |
| 300° | 2.621 | 473 | 0.774 | 15075 | 37.99 |
| 310° | 2.567 | 483 | 0.748 | 16826 | 40.65 |
| 320° | 2.523 | 492 | 0.727 | 18008 | 42.01 |
| 330° | 2.497 | 497 | 0.711 | 18255 | 41.74 |
| 340° | 2.487 | 499 | 0.701 | 18060 | 40.96 |
| 350° | 2.496 | 497 | 0.712 | 17865 | 40.82 |

|    |      |       |     |       |       |       |
|----|------|-------|-----|-------|-------|-------|
| 18 | 0°   | 2.367 | 524 | 0.789 | 20503 | 42.12 |
|    | 10°  | 2.398 | 517 | 0.802 | 19229 | 40.55 |
|    | 20°  | 2.436 | 509 | 0.817 | 17739 | 38.60 |
|    | 30°  | 2.476 | 501 | 0.835 | 16164 | 36.33 |
|    | 40°  | 2.521 | 492 | 0.854 | 14445 | 33.67 |
|    | 50°  | 2.565 | 483 | 0.877 | 12632 | 30.48 |
|    | 60°  | 2.605 | 476 | 0.897 | 10989 | 27.35 |
|    | 70°  | 2.637 | 470 | 0.914 | 9638  | 24.58 |
|    | 80°  | 2.662 | 466 | 0.927 | 8631  | 22.42 |
|    | 90°  | 2.674 | 464 | 0.930 | 8169  | 21.41 |
|    | 100° | 2.668 | 465 | 0.927 | 8387  | 21.89 |
|    | 110° | 2.643 | 469 | 0.913 | 9376  | 24.02 |
|    | 120° | 2.600 | 477 | 0.892 | 11158 | 27.65 |
|    | 130° | 2.541 | 488 | 0.869 | 13523 | 32.02 |
|    | 140° | 2.478 | 500 | 0.848 | 15865 | 35.72 |
|    | 150° | 2.423 | 512 | 0.831 | 17555 | 37.80 |
|    | 160° | 2.384 | 520 | 0.819 | 18704 | 38.98 |



---

|      |       |     |       |       |       |
|------|-------|-----|-------|-------|-------|
| 170° | 2.364 | 524 | 0.811 | 19463 | 39.89 |
| 180° | 2.360 | 525 | 0.804 | 20081 | 41.00 |
| 190° | 2.369 | 523 | 0.800 | 20614 | 42.41 |
| 200° | 2.411 | 514 | 0.803 | 20205 | 43.07 |
| 210° | 2.471 | 502 | 0.811 | 18802 | 42.09 |
| 220° | 2.540 | 488 | 0.831 | 16345 | 38.66 |
| 230° | 2.613 | 475 | 0.871 | 13024 | 32.60 |
| 240° | 2.674 | 464 | 0.929 | 9942  | 26.07 |
| 250° | 2.708 | 458 | 0.977 | 8151  | 21.92 |
| 260° | 2.701 | 459 | 0.977 | 8371  | 22.39 |
| 270° | 2.658 | 466 | 0.932 | 10389 | 26.92 |
| 280° | 2.597 | 478 | 0.883 | 13351 | 33.01 |
| 290° | 2.530 | 490 | 0.842 | 16374 | 38.42 |
| 300° | 2.464 | 503 | 0.810 | 19024 | 42.35 |
| 310° | 2.409 | 515 | 0.789 | 20816 | 44.30 |
| 320° | 2.371 | 523 | 0.777 | 21708 | 44.73 |
| 330° | 2.347 | 528 | 0.772 | 21959 | 44.35 |
| 340° | 2.338 | 530 | 0.772 | 21838 | 43.78 |
| 350° | 2.346 | 528 | 0.779 | 21337 | 43.07 |

|    |      |       |     |       |       |       |
|----|------|-------|-----|-------|-------|-------|
| 19 | 0°   | 2.501 | 496 | 0.739 | 26756 | 61.38 |
|    | 10°  | 2.530 | 490 | 0.750 | 25089 | 58.88 |
|    | 20°  | 2.563 | 484 | 0.759 | 22846 | 55.04 |
|    | 30°  | 2.600 | 477 | 0.768 | 20447 | 50.69 |
|    | 40°  | 2.638 | 470 | 0.777 | 18093 | 46.18 |
|    | 50°  | 2.677 | 463 | 0.786 | 15797 | 41.50 |
|    | 60°  | 2.711 | 457 | 0.793 | 13815 | 37.22 |
|    | 70°  | 2.738 | 453 | 0.796 | 12263 | 33.70 |
|    | 80°  | 2.755 | 450 | 0.797 | 11299 | 31.44 |
|    | 90°  | 2.762 | 449 | 0.798 | 10884 | 30.44 |
|    | 100° | 2.758 | 450 | 0.798 | 11101 | 30.95 |
|    | 110° | 2.739 | 453 | 0.796 | 12141 | 33.39 |
|    | 120° | 2.704 | 459 | 0.790 | 14125 | 37.86 |
|    | 130° | 2.655 | 467 | 0.781 | 17021 | 43.99 |
|    | 140° | 2.600 | 477 | 0.771 | 20346 | 50.42 |
|    | 150° | 2.549 | 486 | 0.759 | 23296 | 55.51 |
|    | 160° | 2.518 | 493 | 0.752 | 25189 | 58.54 |
|    | 170° | 2.494 | 497 | 0.743 | 26892 | 61.33 |
|    | 180° | 2.489 | 498 | 0.739 | 27618 | 62.73 |
|    | 190° | 2.502 | 496 | 0.741 | 27345 | 62.78 |
|    | 200° | 2.547 | 487 | 0.756 | 25159 | 59.85 |
|    | 210° | 2.614 | 474 | 0.780 | 21369 | 53.53 |
|    | 220° | 2.679 | 463 | 0.807 | 17504 | 46.08 |
|    | 230° | 2.738 | 453 | 0.832 | 13957 | 38.36 |
|    | 240° | 2.782 | 446 | 0.854 | 11220 | 31.83 |
|    | 250° | 2.801 | 443 | 0.863 | 9949  | 28.63 |
|    | 260° | 2.793 | 444 | 0.857 | 10314 | 29.51 |
|    | 270° | 2.763 | 449 | 0.841 | 12038 | 33.70 |
|    | 280° | 2.716 | 457 | 0.820 | 14898 | 40.28 |
|    | 290° | 2.661 | 466 | 0.798 | 18235 | 47.33 |
|    | 300° | 2.602 | 477 | 0.775 | 21792 | 54.10 |
|    | 310° | 2.551 | 486 | 0.755 | 24738 | 59.01 |

|    |      |       |     |       |       |       |
|----|------|-------|-----|-------|-------|-------|
|    | 320° | 2.513 | 494 | 0.740 | 26571 | 61.51 |
|    | 330° | 2.486 | 499 | 0.727 | 27479 | 62.28 |
|    | 340° | 2.475 | 501 | 0.715 | 27492 | 61.73 |
|    | 350° | 2.483 | 499 | 0.720 | 27070 | 61.18 |
| 20 | 0°   | 2.053 | 604 | 0.493 | 44252 | 68.40 |
|    | 10°  | 2.062 | 601 | 0.493 | 43311 | 67.55 |
|    | 20°  | 2.087 | 594 | 0.493 | 41174 | 65.78 |
|    | 30°  | 2.120 | 585 | 0.492 | 38446 | 63.33 |
|    | 40°  | 2.156 | 575 | 0.491 | 35288 | 60.16 |
|    | 50°  | 2.199 | 564 | 0.490 | 31543 | 55.91 |
|    | 60°  | 2.236 | 555 | 0.488 | 28105 | 51.53 |
|    | 70°  | 2.267 | 547 | 0.486 | 25186 | 47.47 |
|    | 80°  | 2.287 | 542 | 0.484 | 23282 | 44.63 |
|    | 90°  | 2.292 | 541 | 0.482 | 22621 | 43.58 |
|    | 100° | 2.283 | 543 | 0.482 | 23366 | 44.66 |
|    | 110° | 2.258 | 549 | 0.483 | 25641 | 47.93 |
|    | 120° | 2.217 | 559 | 0.485 | 29371 | 52.92 |
|    | 130° | 2.166 | 572 | 0.488 | 33998 | 58.51 |
|    | 140° | 2.117 | 586 | 0.492 | 38377 | 63.08 |
|    | 150° | 2.074 | 598 | 0.494 | 41894 | 66.10 |
|    | 160° | 2.044 | 607 | 0.496 | 44178 | 67.67 |
|    | 170° | 2.030 | 611 | 0.496 | 45104 | 68.17 |
|    | 180° | 2.027 | 612 | 0.495 | 45298 | 68.24 |
|    | 190° | 2.038 | 608 | 0.493 | 44419 | 67.64 |
|    | 200° | 2.054 | 604 | 0.492 | 43071 | 66.63 |
|    | 210° | 2.076 | 597 | 0.490 | 41342 | 65.33 |
|    | 220° | 2.110 | 588 | 0.488 | 38743 | 63.23 |
|    | 230° | 2.155 | 575 | 0.486 | 34972 | 59.54 |
|    | 240° | 2.203 | 563 | 0.484 | 30689 | 54.61 |
|    | 250° | 2.247 | 552 | 0.483 | 26694 | 49.42 |
|    | 260° | 2.277 | 544 | 0.481 | 23944 | 45.54 |
|    | 270° | 2.292 | 541 | 0.481 | 22765 | 43.83 |
|    | 280° | 2.287 | 542 | 0.482 | 23299 | 44.68 |
|    | 290° | 2.266 | 547 | 0.483 | 25372 | 47.76 |
|    | 300° | 2.233 | 555 | 0.485 | 28571 | 52.25 |
|    | 310° | 2.193 | 565 | 0.488 | 32424 | 57.19 |
|    | 320° | 2.150 | 577 | 0.489 | 36433 | 61.77 |
|    | 330° | 2.109 | 588 | 0.490 | 40037 | 65.32 |
|    | 340° | 2.079 | 596 | 0.492 | 42515 | 67.39 |
|    | 350° | 2.058 | 602 | 0.493 | 44047 | 68.42 |
|    | 360° | 2.053 | 604 | 0.493 | 44252 | 68.40 |
| 21 | 0°   | 2.455 | 505 | 0.468 | 31199 | 68.94 |
|    | 10°  | 2.479 | 500 | 0.468 | 29438 | 66.31 |
|    | 20°  | 2.509 | 494 | 0.469 | 27071 | 62.48 |
|    | 30°  | 2.541 | 488 | 0.470 | 24655 | 58.37 |
|    | 40°  | 2.573 | 482 | 0.469 | 22363 | 54.29 |
|    | 50°  | 2.605 | 476 | 0.469 | 20194 | 50.25 |
|    | 60°  | 2.634 | 471 | 0.468 | 18309 | 46.56 |
|    | 70°  | 2.655 | 467 | 0.465 | 16891 | 43.67 |
|    | 80°  | 2.669 | 465 | 0.462 | 16008 | 41.81 |

---

|      |       |     |       |       |       |
|------|-------|-----|-------|-------|-------|
| 90°  | 2.674 | 464 | 0.460 | 15656 | 41.04 |
| 100° | 2.669 | 465 | 0.461 | 15911 | 41.56 |
| 110° | 2.653 | 467 | 0.462 | 16890 | 43.60 |
| 120° | 2.624 | 473 | 0.463 | 18772 | 47.38 |
| 130° | 2.581 | 480 | 0.463 | 21600 | 52.77 |
| 140° | 2.531 | 490 | 0.461 | 25029 | 58.80 |
| 150° | 2.486 | 499 | 0.460 | 28215 | 63.92 |
| 160° | 2.461 | 504 | 0.461 | 30103 | 66.85 |
| 170° | 2.442 | 508 | 0.459 | 31717 | 69.34 |
| 180° | 2.440 | 508 | 0.459 | 32197 | 70.28 |
| 190° | 2.454 | 505 | 0.461 | 31560 | 69.71 |
| 200° | 2.497 | 497 | 0.472 | 28963 | 66.23 |
| 210° | 2.559 | 485 | 0.486 | 25026 | 60.09 |
| 220° | 2.619 | 473 | 0.498 | 21162 | 53.23 |
| 230° | 2.669 | 465 | 0.504 | 17949 | 46.87 |
| 240° | 2.704 | 459 | 0.506 | 15644 | 41.92 |
| 250° | 2.716 | 456 | 0.503 | 14683 | 39.73 |
| 260° | 2.708 | 458 | 0.498 | 15057 | 40.49 |
| 270° | 2.683 | 462 | 0.494 | 16598 | 43.79 |
| 280° | 2.642 | 469 | 0.490 | 19155 | 49.03 |
| 290° | 2.595 | 478 | 0.486 | 22253 | 54.95 |
| 300° | 2.545 | 487 | 0.480 | 25671 | 60.95 |
| 310° | 2.499 | 496 | 0.475 | 28743 | 65.82 |
| 320° | 2.466 | 503 | 0.472 | 30849 | 68.77 |
| 330° | 2.442 | 508 | 0.469 | 32146 | 70.28 |
| 340° | 2.433 | 510 | 0.466 | 32312 | 70.13 |
| 350° | 2.438 | 509 | 0.466 | 32000 | 69.76 |

|      |      |       |     |       |       |       |
|------|------|-------|-----|-------|-------|-------|
| 21-H | 0°   | 2.185 | 568 | 0.328 | 40977 | 71.73 |
|      | 10°  | 2.195 | 565 | 0.329 | 40302 | 71.23 |
|      | 20°  | 2.227 | 557 | 0.333 | 38478 | 69.99 |
|      | 30°  | 2.273 | 546 | 0.339 | 35865 | 67.94 |
|      | 40°  | 2.329 | 532 | 0.345 | 32594 | 64.82 |
|      | 50°  | 2.387 | 519 | 0.352 | 29097 | 60.80 |
|      | 60°  | 2.438 | 509 | 0.355 | 25992 | 56.64 |
|      | 70°  | 2.478 | 500 | 0.357 | 23551 | 53.01 |
|      | 80°  | 2.500 | 496 | 0.357 | 22166 | 50.79 |
|      | 90°  | 2.505 | 495 | 0.358 | 21918 | 50.43 |
|      | 100° | 2.492 | 498 | 0.358 | 22881 | 52.11 |
|      | 110° | 2.462 | 504 | 0.358 | 25008 | 55.57 |
|      | 120° | 2.418 | 513 | 0.357 | 28008 | 60.04 |
|      | 130° | 2.370 | 523 | 0.354 | 31229 | 64.34 |
|      | 140° | 2.324 | 534 | 0.351 | 34277 | 67.87 |
|      | 150° | 2.281 | 544 | 0.346 | 36898 | 70.37 |
|      | 160° | 2.247 | 552 | 0.342 | 38835 | 71.86 |
|      | 170° | 2.222 | 558 | 0.338 | 40135 | 72.69 |
|      | 180° | 2.216 | 560 | 0.337 | 40528 | 72.94 |
|      | 190° | 2.221 | 558 | 0.337 | 40304 | 72.87 |
|      | 200° | 2.240 | 554 | 0.340 | 39320 | 72.32 |
|      | 210° | 2.268 | 547 | 0.343 | 37759 | 71.21 |
|      | 220° | 2.310 | 537 | 0.348 | 35237 | 68.97 |
|      | 230° | 2.360 | 525 | 0.353 | 32099 | 65.54 |

|     |      |       |     |       |       |       |
|-----|------|-------|-----|-------|-------|-------|
|     | 240° | 2.409 | 515 | 0.356 | 28773 | 61.23 |
|     | 250° | 2.453 | 506 | 0.358 | 25721 | 56.75 |
|     | 260° | 2.486 | 499 | 0.358 | 23389 | 53.00 |
|     | 270° | 2.504 | 495 | 0.358 | 22098 | 50.82 |
|     | 280° | 2.504 | 495 | 0.358 | 22090 | 50.77 |
|     | 290° | 2.483 | 499 | 0.358 | 23384 | 52.84 |
|     | 300° | 2.447 | 507 | 0.357 | 25697 | 56.42 |
|     | 310° | 2.398 | 517 | 0.354 | 28831 | 60.78 |
|     | 320° | 2.341 | 530 | 0.349 | 32344 | 64.98 |
|     | 330° | 2.284 | 543 | 0.343 | 35702 | 68.30 |
|     | 340° | 2.234 | 555 | 0.336 | 38504 | 70.47 |
|     | 350° | 2.198 | 564 | 0.330 | 40371 | 71.54 |
| 22  | 0°   | 2.478 | 500 | 0.013 | 74    | 0.17  |
|     | 10°  | 2.562 | 484 | 0.012 | 68    | 0.16  |
|     | 20°  | 2.627 | 472 | 0.672 | 3697  | 9.35  |
|     | 30°  | 2.646 | 469 | 0.678 | 4279  | 10.98 |
|     | 40°  | 2.665 | 465 | 0.683 | 4988  | 12.99 |
|     | 50°  | 2.682 | 462 | 0.685 | 5703  | 15.04 |
|     | 60°  | 2.697 | 460 | 0.689 | 6327  | 16.88 |
|     | 70°  | 2.709 | 458 | 0.689 | 6842  | 18.42 |
|     | 80°  | 2.718 | 456 | 0.689 | 7172  | 19.42 |
|     | 90°  | 2.722 | 456 | 0.688 | 7298  | 19.82 |
|     | 100° | 2.721 | 456 | 0.688 | 7140  | 19.38 |
|     | 110° | 2.714 | 457 | 0.688 | 6696  | 18.08 |
|     | 120° | 2.700 | 459 | 0.688 | 5931  | 15.86 |
|     | 130° | 2.680 | 463 | 0.687 | 4991  | 13.15 |
|     | 140° | 2.655 | 467 | 0.685 | 4071  | 10.52 |
|     | 150° | 2.628 | 472 | 0.679 | 3394  | 8.59  |
|     | 160° | 2.607 | 476 | 0.670 | 3076  | 7.67  |
|     | 170° | 2.596 | 478 | 0.668 | 2895  | 7.15  |
|     | 180° | 2.596 | 478 | 0.669 | 2875  | 7.10  |
|     | 190° | 2.607 | 476 | 0.678 | 3007  | 7.49  |
|     | 200° | 2.631 | 471 | 0.694 | 3594  | 9.12  |
|     | 210° | 2.660 | 466 | 0.710 | 4743  | 12.31 |
|     | 220° | 2.687 | 461 | 0.722 | 6187  | 16.38 |
|     | 230° | 2.709 | 458 | 0.728 | 7557  | 20.33 |
|     | 240° | 2.724 | 455 | 0.729 | 8552  | 23.26 |
|     | 250° | 2.730 | 454 | 0.727 | 8880  | 24.28 |
|     | 260° | 2.728 | 454 | 0.723 | 8598  | 23.47 |
|     | 270° | 2.719 | 456 | 0.718 | 7697  | 20.86 |
|     | 280° | 2.697 | 460 | 0.709 | 6662  | 17.77 |
|     | 290° | 2.673 | 464 | 0.699 | 5457  | 14.30 |
|     | 300° | 2.649 | 468 | 0.686 | 4286  | 11.03 |
|     | 310° | 2.620 | 473 | 0.659 | 3498  | 8.80  |
|     | 320° | 2.587 | 479 | 0.573 | 2711  | 6.65  |
|     | 330° | 2.532 | 490 | 0.231 | 1118  | 2.63  |
|     | 340° | 2.465 | 503 | 0.055 | 312   | 0.69  |
|     | 350° | 2.443 | 508 | 0.023 | 136   | 0.30  |
| BLB | 0°   | 2.642 | 469 | 0.020 | 160   | 0.41  |
|     | 10°  | 2.735 | 453 | 0.090 | 921   | 2.53  |

|      |       |     |       |      |       |
|------|-------|-----|-------|------|-------|
| 20°  | 2.857 | 434 | 0.003 | 82   | 0.25  |
| 30°  | 2.812 | 441 | 0.634 | 4517 | 13.10 |
| 40°  | 2.852 | 435 | 0.648 | 3728 | 11.12 |
| 50°  | 2.890 | 429 | 0.661 | 3016 | 9.24  |
| 60°  | 2.928 | 424 | 0.674 | 2345 | 7.37  |
| 70°  | 2.957 | 419 | 0.682 | 1860 | 5.96  |
| 80°  | 2.977 | 416 | 0.687 | 1538 | 5.00  |
| 90°  | 2.986 | 415 | 0.689 | 1401 | 4.58  |
| 100° | 2.981 | 416 | 0.686 | 1462 | 4.76  |
| 110° | 2.960 | 419 | 0.679 | 1785 | 5.73  |
| 120° | 2.920 | 425 | 0.668 | 2456 | 7.68  |
| 130° | 2.866 | 433 | 0.654 | 3490 | 10.51 |
| 140° | 2.806 | 442 | 0.639 | 4680 | 13.51 |
| 150° | 2.752 | 451 | 0.624 | 5745 | 15.96 |
| 160° | 2.718 | 456 | 0.614 | 6439 | 17.44 |
| 170° | 2.700 | 459 | 0.609 | 6948 | 18.57 |
| 180° | 2.698 | 460 | 0.608 | 7169 | 19.14 |
| 190° | 2.710 | 458 | 0.610 | 7165 | 19.30 |
| 200° | 2.752 | 451 | 0.620 | 6500 | 18.05 |
| 210° | 2.824 | 439 | 0.640 | 5075 | 14.84 |
| 220° | 2.898 | 428 | 0.666 | 3577 | 11.01 |
| 230° | 2.963 | 419 | 0.695 | 2302 | 7.41  |
| 240° | 3.010 | 412 | 0.721 | 1451 | 4.82  |
| 250° | 3.028 | 410 | 0.733 | 1149 | 3.86  |
| 260° | 3.016 | 411 | 0.728 | 1301 | 4.34  |
| 270° | 2.981 | 416 | 0.709 | 1864 | 6.07  |
| 280° | 2.929 | 423 | 0.684 | 2808 | 8.83  |
| 290° | 2.870 | 432 | 0.657 | 3925 | 11.85 |
| 300° | 2.809 | 441 | 0.629 | 5070 | 14.67 |
| 310° | 2.755 | 450 | 0.597 | 5894 | 16.40 |
| 320° | 2.710 | 458 | 0.519 | 5603 | 15.08 |
| 330° | 2.657 | 467 | 0.251 | 2585 | 6.69  |
| 340° | 2.601 | 477 | 0.065 | 542  | 1.34  |
| 350° | 2.593 | 478 | 0.028 | 204  | 0.50  |

|     |      |       |     |       |      |      |
|-----|------|-------|-----|-------|------|------|
| RFP | 0°   | 2.222 | 558 | 1.028 | 4389 | 7.94 |
|     | 10°  | 2.238 | 554 | 1.031 | 4310 | 7.91 |
|     | 20°  | 2.261 | 548 | 1.033 | 4299 | 8.05 |
|     | 30°  | 2.287 | 542 | 1.036 | 4304 | 8.25 |
|     | 40°  | 2.318 | 535 | 1.040 | 4226 | 8.32 |
|     | 50°  | 2.354 | 527 | 1.046 | 3962 | 8.04 |
|     | 60°  | 2.393 | 518 | 1.056 | 3428 | 7.19 |
|     | 70°  | 2.430 | 510 | 1.066 | 2744 | 5.94 |
|     | 80°  | 2.456 | 505 | 1.075 | 2170 | 4.79 |
|     | 90°  | 2.465 | 503 | 1.079 | 1938 | 4.31 |
|     | 100° | 2.452 | 506 | 1.072 | 2188 | 4.82 |
|     | 110° | 2.418 | 513 | 1.058 | 2902 | 6.22 |
|     | 120° | 2.369 | 523 | 1.045 | 3818 | 7.85 |
|     | 130° | 2.317 | 535 | 1.037 | 4464 | 8.78 |
|     | 140° | 2.272 | 546 | 1.037 | 4546 | 8.60 |
|     | 150° | 2.241 | 553 | 1.042 | 4254 | 7.83 |
|     | 160° | 2.226 | 557 | 1.047 | 3918 | 7.11 |

|       |      |       |     |       |      |      |
|-------|------|-------|-----|-------|------|------|
|       | 170° | 2.217 | 559 | 1.050 | 3695 | 6.65 |
|       | 180° | 2.216 | 560 | 1.049 | 3676 | 6.61 |
|       | 190° | 2.218 | 559 | 1.044 | 3838 | 6.92 |
|       | 200° | 2.227 | 557 | 1.038 | 4141 | 7.52 |
|       | 210° | 2.241 | 553 | 1.031 | 4505 | 8.29 |
|       | 220° | 2.265 | 547 | 1.025 | 4836 | 9.09 |
|       | 230° | 2.301 | 539 | 1.021 | 4888 | 9.48 |
|       | 240° | 2.348 | 528 | 1.026 | 4435 | 8.96 |
|       | 250° | 2.397 | 517 | 1.041 | 3529 | 7.43 |
|       | 260° | 2.438 | 509 | 1.060 | 2612 | 5.69 |
|       | 270° | 2.460 | 504 | 1.073 | 2124 | 4.71 |
|       | 280° | 2.455 | 505 | 1.073 | 2270 | 5.01 |
|       | 290° | 2.427 | 511 | 1.061 | 3003 | 6.48 |
|       | 300° | 2.380 | 521 | 1.044 | 4029 | 8.36 |
|       | 310° | 2.326 | 533 | 1.029 | 4872 | 9.66 |
|       | 320° | 2.277 | 545 | 1.020 | 5216 | 9.91 |
|       | 330° | 2.241 | 553 | 1.017 | 5151 | 9.48 |
|       | 340° | 2.219 | 559 | 1.020 | 4849 | 8.75 |
|       | 350° | 2.213 | 560 | 1.024 | 4549 | 8.16 |
| RFP-H | 0°   | 2.227 | 557 | 1.149 | 677  | 1.23 |
|       | 10°  | 2.230 | 556 | 1.148 | 704  | 1.28 |
|       | 20°  | 2.243 | 553 | 1.146 | 794  | 1.46 |
|       | 30°  | 2.262 | 548 | 1.142 | 926  | 1.74 |
|       | 40°  | 2.289 | 542 | 1.138 | 1074 | 2.06 |
|       | 50°  | 2.323 | 534 | 1.137 | 1157 | 2.29 |
|       | 60°  | 2.359 | 526 | 1.137 | 1093 | 2.23 |
|       | 70°  | 2.392 | 518 | 1.141 | 897  | 1.88 |
|       | 80°  | 2.413 | 514 | 1.143 | 727  | 1.55 |
|       | 90°  | 2.413 | 514 | 1.140 | 763  | 1.63 |
|       | 100° | 2.392 | 518 | 1.134 | 1033 | 2.17 |
|       | 110° | 2.360 | 526 | 1.134 | 1356 | 2.77 |
|       | 120° | 2.328 | 533 | 1.146 | 1463 | 2.91 |
|       | 130° | 2.303 | 538 | 1.164 | 1317 | 2.56 |
|       | 140° | 2.289 | 542 | 1.185 | 1065 | 2.05 |
|       | 150° | 2.281 | 544 | 1.203 | 837  | 1.60 |
|       | 160° | 2.277 | 545 | 1.218 | 679  | 1.29 |
|       | 170° | 2.277 | 545 | 1.227 | 597  | 1.13 |
|       | 180° | 2.277 | 545 | 1.230 | 575  | 1.09 |
|       | 190° | 2.278 | 544 | 1.227 | 599  | 1.14 |
|       | 200° | 2.278 | 544 | 1.218 | 678  | 1.29 |
|       | 210° | 2.280 | 544 | 1.204 | 826  | 1.58 |
|       | 220° | 2.289 | 542 | 1.185 | 1056 | 2.03 |
|       | 230° | 2.304 | 538 | 1.165 | 1310 | 2.55 |
|       | 240° | 2.329 | 532 | 1.146 | 1454 | 2.89 |
|       | 250° | 2.360 | 525 | 1.135 | 1352 | 2.76 |
|       | 260° | 2.393 | 518 | 1.134 | 1036 | 2.17 |
|       | 270° | 2.414 | 514 | 1.141 | 763  | 1.63 |
|       | 280° | 2.415 | 513 | 1.144 | 730  | 1.56 |
|       | 290° | 2.394 | 518 | 1.141 | 899  | 1.89 |
|       | 300° | 2.361 | 525 | 1.137 | 1099 | 2.25 |
|       | 310° | 2.324 | 533 | 1.137 | 1168 | 2.31 |

---

|                    |       |       |       |       |       |       |
|--------------------|-------|-------|-------|-------|-------|-------|
|                    | 320°  | 2.291 | 541   | 1.139 | 1087  | 2.09  |
|                    | 330°  | 2.264 | 548   | 1.142 | 941   | 1.77  |
|                    | 340°  | 2.243 | 553   | 1.146 | 799   | 1.47  |
|                    | 350°  | 2.231 | 556   | 1.148 | 708   | 1.29  |
| RFP<br>(CAM-B3LYP) | 0°    | 2.382 | 521   | 1.189 | 6552  | 13.62 |
|                    | 10°   | 2.396 | 517   | 1.193 | 6188  | 13.03 |
|                    | 20°   | 2.419 | 513   | 1.197 | 5763  | 12.37 |
|                    | 30°   | 2.445 | 507   | 1.202 | 5306  | 11.63 |
|                    | 40°   | 2.475 | 501   | 1.208 | 4753  | 10.67 |
|                    | 50°   | 2.506 | 495   | 1.215 | 4113  | 9.47  |
|                    | 60°   | 2.538 | 489   | 1.221 | 3420  | 8.08  |
|                    | 70°   | 2.564 | 484   | 1.224 | 2816  | 6.79  |
|                    | 80°   | 2.580 | 481   | 1.226 | 2411  | 5.89  |
|                    | 90°   | 2.585 | 480   | 1.226 | 2269  | 5.56  |
|                    | 100°  | 2.577 | 481   | 1.223 | 2436  | 5.93  |
|                    | 110°  | 2.555 | 485   | 1.219 | 2935  | 7.02  |
|                    | 120°  | 2.521 | 492   | 1.214 | 3744  | 8.72  |
|                    | 130°  | 2.478 | 500   | 1.210 | 4721  | 10.63 |
|                    | 140°  | 2.435 | 509   | 1.209 | 5554  | 12.07 |
|                    | 150°  | 2.400 | 517   | 1.209 | 6007  | 12.69 |
|                    | 160°  | 2.379 | 521   | 1.211 | 6100  | 12.66 |
|                    | 170°  | 2.366 | 524   | 1.213 | 6067  | 12.46 |
|                    | 180°  | 2.364 | 524   | 1.212 | 6057  | 12.41 |
|                    | 190°  | 2.369 | 523   | 1.209 | 6119  | 12.59 |
|                    | 200°  | 2.382 | 521   | 1.206 | 6164  | 12.83 |
|                    | 210°  | 2.402 | 516   | 1.203 | 6086  | 12.88 |
|                    | 220°  | 2.431 | 510   | 1.202 | 5754  | 12.47 |
|                    | 230°  | 2.468 | 502   | 1.203 | 5090  | 11.37 |
|                    | 240°  | 2.508 | 494   | 1.207 | 4195  | 9.68  |
|                    | 250°  | 2.545 | 487   | 1.214 | 3318  | 7.88  |
|                    | 260°  | 2.571 | 482   | 1.219 | 2693  | 6.53  |
|                    | 270°  | 2.583 | 480   | 1.223 | 2408  | 5.89  |
|                    | 280°  | 2.581 | 480   | 1.224 | 2499  | 6.10  |
|                    | 290°  | 2.564 | 484   | 1.220 | 2959  | 7.13  |
|                    | 300°  | 2.532 | 490   | 1.214 | 3759  | 8.84  |
|                    | 310°  | 2.491 | 498   | 1.205 | 4783  | 10.88 |
|                    | 320°  | 2.448 | 507   | 1.195 | 5774  | 12.68 |
|                    | 330°  | 2.412 | 514   | 1.187 | 6497  | 13.86 |
|                    | 340°  | 2.386 | 520   | 1.185 | 6820  | 14.24 |
| 350°               | 2.375 | 522   | 1.186 | 6804  | 14.07 |       |

---

| Model | 13    | 14    | 16a   | 16b   | 17    | 18    | 19    | 20    | 21    | 21-H  | 22    | BLB   | RFP  | RFP-H | RFP (CAM-B3LYP) |
|-------|-------|-------|-------|-------|-------|-------|-------|-------|-------|-------|-------|-------|------|-------|-----------------|
| 0°    | 37.33 | 38.82 | 38.71 | 38.94 | 40.68 | 42.12 | 61.38 | 68.40 | 68.94 | 71.73 | 7.25  | 18.11 | 7.94 | 1.23  | 13.62           |
| 10°   | 35.72 | 37.38 | 36.85 | 37.43 | 38.99 | 40.55 | 58.88 | 67.55 | 66.31 | 71.23 | 8.06  | 14.42 | 7.91 | 1.28  | 13.03           |
| 20°   | 33.35 | 34.81 | 34.47 | 34.99 | 36.41 | 38.60 | 55.04 | 65.78 | 62.48 | 69.99 | 9.35  | 15.02 | 8.05 | 1.46  | 12.37           |
| 30°   | 30.77 | 32.06 | 31.85 | 32.17 | 33.68 | 36.33 | 50.69 | 63.33 | 58.37 | 67.94 | 10.98 | 13.10 | 8.25 | 1.74  | 11.63           |
| 40°   | 27.87 | 28.97 | 28.92 | 29.24 | 30.42 | 33.67 | 46.18 | 60.16 | 54.29 | 64.82 | 12.99 | 11.12 | 8.32 | 2.06  | 10.67           |
| 50°   | 24.91 | 25.86 | 25.97 | 26.09 | 27.20 | 30.48 | 41.50 | 55.91 | 50.25 | 60.80 | 15.04 | 9.24  | 8.04 | 2.29  | 9.47            |
| 60°   | 22.21 | 22.90 | 23.27 | 23.12 | 24.45 | 27.35 | 37.22 | 51.53 | 46.56 | 56.64 | 16.88 | 7.37  | 7.19 | 2.23  | 8.08            |
| 70°   | 19.81 | 20.34 | 21.07 | 20.61 | 21.84 | 24.58 | 33.70 | 47.47 | 43.67 | 53.01 | 18.42 | 5.96  | 5.94 | 1.88  | 6.79            |
| 80°   | 18.07 | 18.47 | 19.42 | 18.95 | 20.02 | 22.42 | 31.44 | 44.63 | 41.81 | 50.79 | 19.42 | 5.00  | 4.79 | 1.55  | 5.89            |
| 90°   | 17.25 | 17.68 | 18.65 | 18.22 | 19.18 | 21.41 | 30.44 | 43.58 | 41.04 | 50.43 | 19.82 | 4.58  | 4.31 | 1.63  | 5.56            |
| 100°  | 17.58 | 18.13 | 19.09 | 18.67 | 19.57 | 21.89 | 30.95 | 44.66 | 41.56 | 52.11 | 19.38 | 4.76  | 4.82 | 2.17  | 5.93            |
| 110°  | 19.37 | 19.92 | 20.82 | 20.46 | 21.45 | 24.02 | 33.39 | 47.93 | 43.60 | 55.57 | 18.08 | 5.73  | 6.22 | 2.77  | 7.02            |
| 120°  | 22.60 | 23.12 | 23.73 | 23.64 | 24.93 | 27.65 | 37.86 | 52.92 | 47.38 | 60.04 | 15.86 | 7.68  | 7.85 | 2.91  | 8.72            |
| 130°  | 26.98 | 27.44 | 27.66 | 27.82 | 29.32 | 32.02 | 43.99 | 58.51 | 52.77 | 64.34 | 13.15 | 10.51 | 8.78 | 2.56  | 10.63           |
| 140°  | 31.27 | 31.82 | 31.69 | 31.91 | 33.58 | 35.72 | 50.42 | 63.08 | 58.80 | 67.87 | 10.52 | 13.51 | 8.60 | 2.05  | 12.07           |
| 150°  | 34.25 | 35.18 | 34.76 | 34.84 | 36.83 | 37.80 | 55.51 | 66.10 | 63.92 | 70.37 | 8.59  | 15.96 | 7.83 | 1.60  | 12.69           |
| 160°  | 35.67 | 36.76 | 36.55 | 36.52 | 38.27 | 38.98 | 58.54 | 67.67 | 66.85 | 71.86 | 7.67  | 17.44 | 7.11 | 1.29  | 12.66           |
| 170°  | 36.61 | 38.02 | 37.77 | 38.16 | 39.61 | 39.89 | 61.33 | 68.17 | 69.34 | 72.69 | 7.15  | 18.57 | 6.65 | 1.13  | 12.46           |
| 180°  | 37.29 | 39.17 | 38.60 | 39.16 | 40.40 | 41.00 | 62.73 | 68.24 | 70.28 | 72.94 | 7.10  | 19.14 | 6.61 | 1.09  | 12.41           |
| 190°  | 38.06 | 39.44 | 39.33 | 39.65 | 41.04 | 42.41 | 62.78 | 67.64 | 69.71 | 72.87 | 7.49  | 19.30 | 6.92 | 1.14  | 12.59           |
| 200°  | 38.12 | 38.23 | 38.22 | 38.71 | 40.33 | 43.07 | 59.85 | 66.63 | 66.23 | 72.32 | 9.12  | 18.05 | 7.52 | 1.29  | 12.83           |
| 210°  | 35.50 | 35.15 | 34.74 | 35.64 | 37.51 | 42.09 | 53.53 | 65.33 | 60.09 | 71.21 | 12.31 | 14.84 | 8.29 | 1.58  | 12.88           |
| 220°  | 30.72 | 30.58 | 30.40 | 31.18 | 32.98 | 38.66 | 46.08 | 63.23 | 53.23 | 68.97 | 16.38 | 11.01 | 9.09 | 2.03  | 12.47           |
| 230°  | 25.17 | 24.89 | 25.18 | 25.81 | 27.34 | 32.60 | 38.36 | 59.54 | 46.87 | 65.54 | 20.33 | 7.41  | 9.48 | 2.55  | 11.37           |
| 240°  | 19.88 | 19.79 | 20.66 | 20.73 | 21.84 | 26.07 | 31.83 | 54.61 | 41.92 | 61.23 | 23.26 | 4.82  | 8.96 | 2.89  | 9.68            |
| 250°  | 16.91 | 17.03 | 18.26 | 17.93 | 18.85 | 21.92 | 28.63 | 49.42 | 39.73 | 56.75 | 24.28 | 3.86  | 7.43 | 2.76  | 7.88            |
| 260°  | 17.31 | 17.64 | 18.72 | 18.46 | 19.42 | 22.39 | 29.51 | 45.54 | 40.49 | 53.00 | 23.47 | 4.34  | 5.69 | 2.17  | 6.53            |
| 270°  | 20.96 | 21.18 | 21.94 | 21.83 | 23.11 | 26.92 | 33.70 | 43.83 | 43.79 | 50.82 | 20.86 | 6.07  | 4.71 | 1.63  | 5.89            |
| 280°  | 26.00 | 26.26 | 26.43 | 26.78 | 28.36 | 33.01 | 40.28 | 44.68 | 49.03 | 50.77 | 17.77 | 8.83  | 5.01 | 1.56  | 6.10            |
| 290°  | 31.14 | 31.58 | 31.15 | 31.76 | 33.72 | 38.42 | 47.33 | 47.76 | 54.95 | 52.84 | 14.30 | 11.85 | 6.48 | 1.89  | 7.13            |
| 300°  | 35.41 | 35.89 | 35.36 | 36.04 | 37.99 | 42.35 | 54.10 | 52.25 | 60.95 | 56.42 | 11.03 | 14.67 | 8.36 | 2.25  | 8.84            |
| 310°  | 38.05 | 38.76 | 38.25 | 38.82 | 40.65 | 44.30 | 59.01 | 57.19 | 65.82 | 60.78 | 8.80  | 16.40 | 9.66 | 2.31  | 10.88           |
| 320°  | 38.90 | 39.85 | 39.69 | 39.92 | 42.01 | 44.73 | 61.51 | 61.77 | 68.77 | 64.98 | 6.65  | 15.08 | 9.91 | 2.09  | 12.68           |
| 330°  | 38.60 | 39.42 | 40.13 | 39.90 | 41.74 | 44.35 | 62.28 | 65.32 | 70.28 | 68.30 | 4.80  | 13.80 | 9.48 | 1.77  | 13.86           |
| 340°  | 37.59 | 38.00 | 39.96 | 39.09 | 40.96 | 43.78 | 61.73 | 67.39 | 70.13 | 70.47 | 6.37  | 19.10 | 8.75 | 1.47  | 14.24           |
| 350°  | 37.54 | 37.84 | 39.59 | 38.88 | 40.82 | 43.07 | 61.18 | 68.42 | 69.76 | 71.54 | 6.73  | 19.21 | 8.16 | 1.29  | 14.07           |

**Table S11** TPA Cross-sections [in GM] extracted from Tables S10 and S12 as determined at the B3LYP/6-31G+(d,p) Level of Theory (except where noted) with PCM (H<sub>2</sub>O). The Cross-sections correspond to the S<sub>0</sub> to S<sub>1</sub> transition except for Models 22 and BLB at the near-planar conformations ( $\theta_{\text{acylimine}} = 0, 10, 20, 340$  and  $350$ ) where the transition is to the second excited state.



| Model | $\theta_{\text{acylimine}}$ | State | Energy [eV] | wavelength [nm] | $f$   | $\delta^{\text{TPA}}$ | TPA [GM] |       |
|-------|-----------------------------|-------|-------------|-----------------|-------|-----------------------|----------|-------|
| 22    | 0°                          | 1     | 2.478       | 500             | 0.014 | 75                    | 0.17     |       |
|       |                             | 2     | 2.596       | 478             | 0.650 | 2938                  | 7.25     |       |
|       |                             | 3     | 3.055       | 406             | 0.000 | 4                     | 0.01     |       |
|       | 10°                         | 1     | 2.562       | 484             | 0.012 | 68                    | 0.16     |       |
|       |                             | 2     | 2.61        | 475             | 0.656 | 3231                  | 8.06     |       |
|       |                             | 3     | 3.074       | 403             | 0.000 | 4                     | 0.01     |       |
|       | 20°                         | 1     | 2.627       | 472             | 0.672 | 3699                  | 9.35     |       |
|       |                             | 2     | 2.675       | 464             | 0.003 | 71                    | 0.19     |       |
|       |                             | 3     | 3.098       | 400             | 0.000 | 4                     | 0.01     |       |
|       | 330°                        | 1     | 2.532       | 490             | 0.231 | 1119                  | 2.63     |       |
|       |                             | 2     | 2.622       | 473             | 0.435 | 1907                  | 4.80     |       |
|       |                             | 3     | 3.065       | 405             | 0.001 | 2                     | 0.01     |       |
|       | 340°                        | 1     | 2.465       | 503             | 0.056 | 313                   | 0.70     |       |
|       |                             | 2     | 2.593       | 478             | 0.606 | 2585                  | 6.37     |       |
|       |                             | 3     | 3.049       | 407             | 0.001 | 2                     | 0.01     |       |
|       | 350°                        | 1     | 2.443       | 508             | 0.023 | 137                   | 0.30     |       |
|       |                             | 2     | 2.588       | 479             | 0.637 | 2744                  | 6.73     |       |
|       |                             | 3     | 3.045       | 407             | 0.000 | 3                     | 0.01     |       |
|       | BLB                         | 0°    | 1           | 2.642           | 469   | 0.02                  | 160      | 0.41  |
|       |                             |       | 2           | 2.718           | 456   | 0.585                 | 6693     | 18.11 |
|       |                             |       | 3           | 3.246           | 382   | 0.001                 | 3        | 0.01  |
| 10°   |                             | 1     | 2.735       | 453             | 0.09  | 919                   | 2.52     |       |
|       |                             | 2     | 2.745       | 452             | 0.524 | 5226                  | 14.42    |       |
|       |                             | 3     | 3.272       | 379             | 0.001 | 3                     | 0.01     |       |
| 20°   |                             | 1     | 2.776       | 447             | 0.621 | 5319                  | 15.02    |       |
|       |                             | 2     | 2.857       | 434             | 0.003 | 75                    | 0.23     |       |
|       |                             | 3     | 3.303       | 375             | 0.001 | 5                     | 0.02     |       |
| 330°  |                             | 1     | 2.657       | 467             | 0.251 | 2584                  | 6.68     |       |
|       |                             | 2     | 2.735       | 453             | 0.352 | 5035                  | 13.80    |       |
|       |                             | 3     | 3.248       | 382             | 0.001 | 4                     | 0.02     |       |
| 340°  |                             | 1     | 2.601       | 477             | 0.065 | 542                   | 1.34     |       |
|       |                             | 2     | 2.704       | 459             | 0.534 | 7132                  | 19.10    |       |
|       |                             | 3     | 3.232       | 384             | 0.001 | 4                     | 0.02     |       |
| 350°  | 1                           | 2.593 | 478         | 0.028           | 204   | 0.50                  |          |       |
|       | 2                           | 2.703 | 459         | 0.572           | 7178  | 19.21                 |          |       |
|       | 3                           | 3.231 | 384         | 0.001           | 3     | 0.01                  |          |       |

**Table S12** TD-DFT data for the first 3 states of Models 22 and BLB at their near-planar conformations ( $\theta_{\text{acylimine}} = 0, 10, 20, 340$  and  $350$ ). Level of Theory is B3LYP/6-31G+(d,p) with PCM ( $\text{H}_2\text{O}$ ).

| $\theta_{\text{acylimine}}$ | B3LYP            |                 |                |          | CAM-B3LYP        |                 |                |          |
|-----------------------------|------------------|-----------------|----------------|----------|------------------|-----------------|----------------|----------|
|                             | $\Delta\mu$ (au) | $\mu_{01}$ (au) | $\cos^2\theta$ | TPA (GM) | $\Delta\mu$ (au) | $\mu_{01}$ (au) | $\cos^2\theta$ | TPA (GM) |
| 0                           | 5.81             | 2.24            | 0.99           | 146.05   | 1.93             | 3.35            | 0.84           | 32.25    |
| 10                          | 5.93             | 2.23            | 0.99           | 149.94   | 1.85             | 3.35            | 0.84           | 29.56    |
| 20                          | 5.85             | 2.20            | 0.99           | 143.05   | 1.74             | 3.36            | 0.85           | 26.60    |
| 30                          | 5.75             | 2.18            | 0.99           | 130.93   | 1.62             | 3.37            | 0.86           | 22.88    |
| 40                          | 5.65             | 2.15            | 0.99           | 124.85   | 1.51             | 3.38            | 0.87           | 20.12    |
| 50                          | 5.54             | 2.12            | 0.98           | 118.80   | 1.40             | 3.38            | 0.89           | 17.96    |
| 60                          | 5.44             | 2.10            | 0.98           | 110.40   | 1.31             | 3.38            | 0.90           | 15.58    |
| 70                          | 5.36             | 2.08            | 0.97           | 105.71   | 1.23             | 3.37            | 0.91           | 14.03    |
| 80                          | 5.30             | 2.06            | 0.97           | 101.80   | 1.18             | 3.37            | 0.91           | 12.88    |
| 90                          | 5.27             | 2.06            | 0.97           | 98.68    | 1.15             | 3.36            | 0.92           | 12.12    |

**Table S13** Components contributing to the 2LM expression (Equation 5 in the main text) determined at the B3LYP and CAM-B3LYP/6-31+G(d,p) levels of theory in the gas phase for Model 21 at  $\theta_{\text{acylimine}}$  varying from 0° to 90°. All data is for the  $S_0$  to  $S_1$  transition except for the CAM-B3LYP data for conformers with  $\theta_{\text{acylimine}} = 0, 10$  in which data for the  $S_0$  to  $S_2$  is given because the first excited-state was dark.

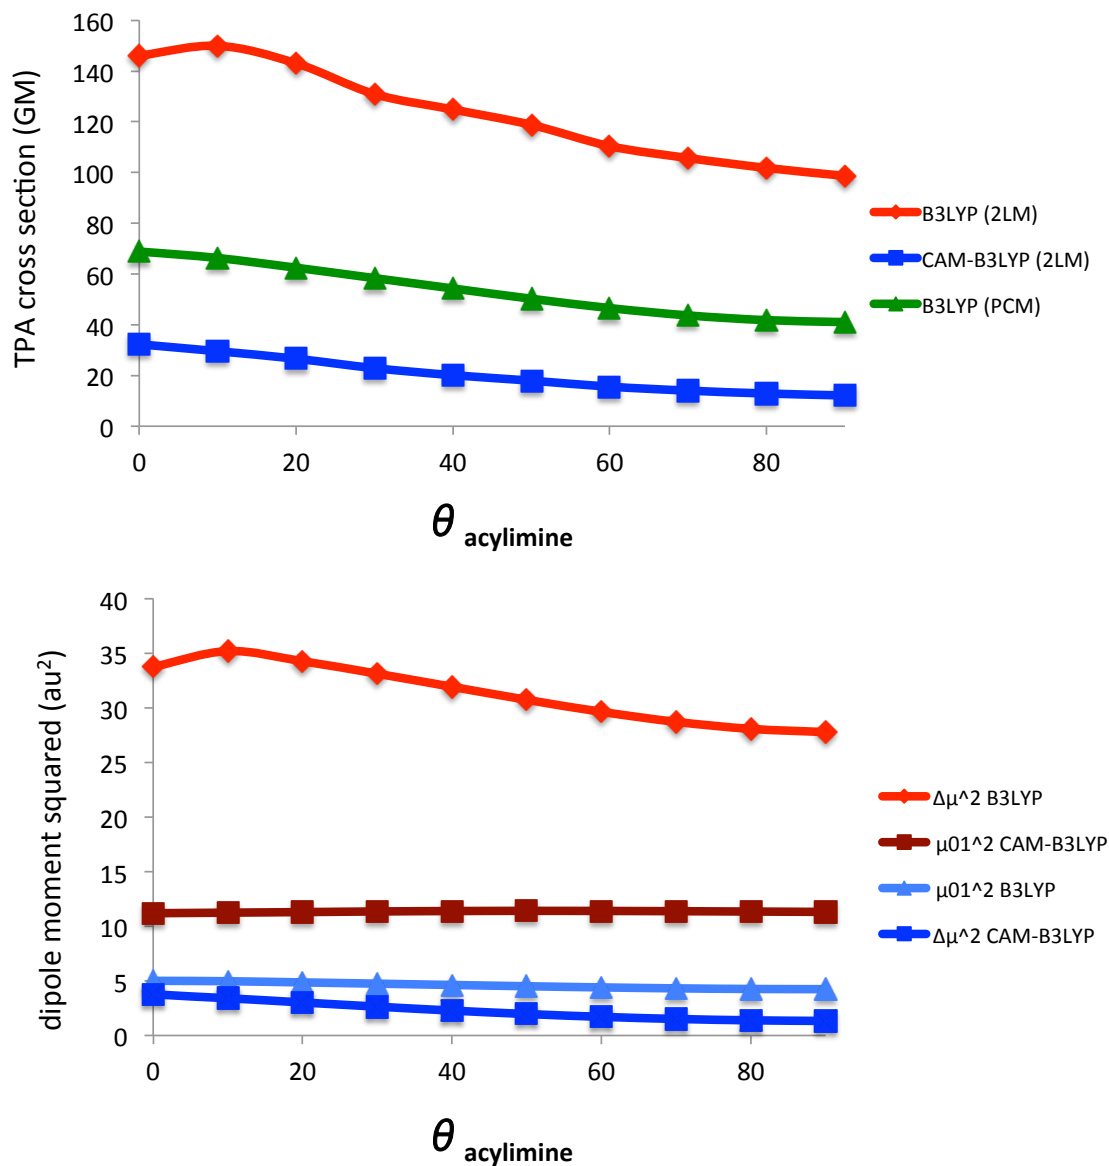

**Fig. S4** Top: TPA cross sections computed for Model 21 (at  $\theta_{\text{acylimine}}$  varying from 0° to 90°) via the 2LM in the gas phase (as given in Table S13) versus the corresponding PCM values for B3LYP (given in Table S11). Bottom: The magnitudes of the dipole moments contributing to the 2LM expression (as given in Table S13).

**Table S14** Variation of TD-DFT properties with tilt and twist angles (see Table S1) for Model 21 at fixed  $\theta_{\text{acylimine}}$  of  $0^\circ$ ,  $90^\circ$ ,  $180^\circ$  and  $270^\circ$ . The TD-DFT values are for the transition to  $S_1$  as determined at the B3LYP/6-31G+(d,p) level of theory and PCM with parameters for  $\text{H}_2\text{O}$ .

| $\theta_{\text{acylimine}}$ | tilt | twist | Energy [eV] | wavelength [nm] | $f$   | $\delta^{\text{TPA}}$ | TPA [GM] |
|-----------------------------|------|-------|-------------|-----------------|-------|-----------------------|----------|
| $0^\circ$                   | -30  | 160   | 2.401       | 516             | 0.317 | 30361                 | 64.16    |
|                             | -30  | 165   | 2.402       | 516             | 0.356 | 30743                 | 65.04    |
|                             | -30  | 170   | 2.401       | 516             | 0.391 | 30992                 | 65.52    |
|                             | -30  | 175   | 2.398       | 517             | 0.420 | 31296                 | 65.99    |
|                             | -30  | 180   | 2.392       | 518             | 0.441 | 31702                 | 66.52    |
|                             | -30  | 185   | 2.388       | 519             | 0.456 | 32059                 | 67.03    |
|                             | -30  | 190   | 2.391       | 519             | 0.471 | 32098                 | 67.27    |
|                             | -30  | 195   | 2.391       | 519             | 0.476 | 32374                 | 67.85    |
|                             | -30  | 200   | 2.389       | 519             | 0.471 | 32748                 | 68.52    |
|                             | -25  | 160   | 2.423       | 512             | 0.334 | 30060                 | 64.69    |
|                             | -25  | 165   | 2.422       | 512             | 0.371 | 30458                 | 65.51    |
|                             | -25  | 170   | 2.420       | 512             | 0.405 | 30766                 | 66.08    |
|                             | -25  | 175   | 2.414       | 514             | 0.428 | 31236                 | 66.76    |
|                             | -25  | 180   | 2.408       | 515             | 0.445 | 31741                 | 67.46    |
|                             | -25  | 185   | 2.407       | 515             | 0.461 | 31955                 | 67.90    |
|                             | -25  | 190   | 2.409       | 515             | 0.472 | 32079                 | 68.27    |
|                             | -25  | 195   | 2.406       | 515             | 0.469 | 32528                 | 69.05    |
|                             | -25  | 200   | 2.408       | 515             | 0.466 | 32560                 | 69.21    |
|                             | -20  | 160   | 2.437       | 509             | 0.351 | 30049                 | 65.46    |
|                             | -20  | 165   | 2.436       | 509             | 0.386 | 30461                 | 66.27    |
|                             | -20  | 170   | 2.431       | 510             | 0.414 | 30904                 | 66.99    |
|                             | -20  | 175   | 2.424       | 512             | 0.433 | 31461                 | 67.78    |
|                             | -20  | 180   | 2.420       | 512             | 0.450 | 31851                 | 68.41    |
|                             | -20  | 185   | 2.422       | 512             | 0.465 | 31971                 | 68.77    |
|                             | -20  | 190   | 2.421       | 512             | 0.467 | 32297                 | 69.38    |
|                             | -20  | 195   | 2.421       | 512             | 0.464 | 32433                 | 69.68    |
|                             | -20  | 200   | 2.425       | 511             | 0.459 | 32247                 | 69.51    |
|                             | -15  | 160   | 2.448       | 506             | 0.368 | 30161                 | 66.29    |
|                             | -15  | 165   | 2.445       | 507             | 0.400 | 30586                 | 67.06    |
|                             | -15  | 170   | 2.439       | 508             | 0.423 | 31096                 | 67.83    |
|                             | -15  | 175   | 2.433       | 510             | 0.440 | 31599                 | 68.59    |
|                             | -15  | 180   | 2.433       | 510             | 0.457 | 31772                 | 68.97    |
|                             | -15  | 185   | 2.434       | 509             | 0.466 | 31943                 | 69.38    |
|                             | -15  | 190   | 2.433       | 510             | 0.465 | 32149                 | 69.77    |
|                             | -15  | 195   | 2.437       | 509             | 0.462 | 31960                 | 69.58    |
|                             | -15  | 200   | 2.439       | 508             | 0.452 | 31898                 | 69.58    |
|                             | -10  | 160   | 2.457       | 505             | 0.386 | 30237                 | 66.94    |
|                             | -10  | 165   | 2.453       | 506             | 0.413 | 30662                 | 67.65    |
|                             | -10  | 170   | 2.446       | 507             | 0.432 | 31208                 | 68.45    |
|                             | -10  | 175   | 2.444       | 507             | 0.450 | 31462                 | 68.90    |
|                             | -10  | 180   | 2.445       | 507             | 0.463 | 31578                 | 69.19    |
|                             | -10  | 185   | 2.444       | 507             | 0.467 | 31750                 | 69.54    |
|                             | -10  | 190   | 2.447       | 507             | 0.466 | 31658                 | 69.48    |
|                             | -10  | 195   | 2.450       | 506             | 0.459 | 31476                 | 69.25    |
|                             | -10  | 200   | 2.445       | 507             | 0.436 | 31687                 | 69.44    |
|                             | -5   | 160   | 2.462       | 504             | 0.402 | 30399                 | 67.54    |
|                             | -5   | 165   | 2.456       | 505             | 0.424 | 30855                 | 68.22    |
|                             | -5   | 170   | 2.452       | 506             | 0.443 | 31205                 | 68.77    |
|                             | -5   | 175   | 2.452       | 506             | 0.459 | 31283                 | 68.94    |
|                             | -5   | 180   | 2.451       | 506             | 0.466 | 31420                 | 69.22    |
|                             | -5   | 185   | 2.452       | 506             | 0.467 | 31410                 | 69.25    |
|                             | -5   | 190   | 2.451       | 506             | 0.458 | 31362                 | 69.10    |
|                             | -5   | 195   | 2.456       | 505             | 0.450 | 31156                 | 68.92    |
|                             | -5   | 200   | 2.459       | 504             | 0.431 | 31030                 | 68.78    |
|                             | 0    | 160   | 2.461       | 504             | 0.415 | 30599                 | 67.97    |
|                             | 0    | 165   | 2.461       | 504             | 0.440 | 30787                 | 68.36    |
|                             | 0    | 170   | 2.459       | 504             | 0.456 | 30895                 | 68.48    |
|                             | 0    | 175   | 2.457       | 505             | 0.466 | 31009                 | 68.65    |
|                             | 0    | 180   | 2.455       | 505             | 0.468 | 31199                 | 68.94    |
|                             | 0    | 185   | 2.457       | 505             | 0.465 | 30996                 | 68.62    |
|                             | 0    | 190   | 2.458       | 504             | 0.455 | 30893                 | 68.46    |

|     |     |     |       |     |       |       |       |
|-----|-----|-----|-------|-----|-------|-------|-------|
|     | 0   | 195 | 2.461 | 504 | 0.439 | 30722 | 68.22 |
|     | 0   | 200 | 2.463 | 503 | 0.417 | 30528 | 67.93 |
|     | 5   | 160 | 2.460 | 504 | 0.432 | 30916 | 68.59 |
|     | 5   | 165 | 2.457 | 505 | 0.450 | 31055 | 68.74 |
|     | 5   | 170 | 2.451 | 506 | 0.457 | 31183 | 68.71 |
|     | 5   | 175 | 2.452 | 506 | 0.466 | 31094 | 68.56 |
|     | 5   | 180 | 2.455 | 505 | 0.467 | 30880 | 68.24 |
|     | 5   | 185 | 2.457 | 505 | 0.461 | 30775 | 68.11 |
|     | 5   | 190 | 2.452 | 506 | 0.444 | 31068 | 68.49 |
|     | 5   | 195 | 2.462 | 504 | 0.429 | 30362 | 67.46 |
|     | 5   | 200 | 2.465 | 503 | 0.403 | 30101 | 67.05 |
|     | 10  | 160 | 2.447 | 507 | 0.437 | 31363 | 68.83 |
|     | 10  | 165 | 2.446 | 507 | 0.453 | 31351 | 68.76 |
|     | 10  | 170 | 2.447 | 507 | 0.465 | 31147 | 68.39 |
|     | 10  | 175 | 2.450 | 506 | 0.471 | 30888 | 67.95 |
|     | 10  | 180 | 2.452 | 506 | 0.468 | 30686 | 67.66 |
|     | 10  | 185 | 2.454 | 505 | 0.458 | 30552 | 67.45 |
|     | 10  | 190 | 2.458 | 505 | 0.443 | 30209 | 66.91 |
|     | 10  | 195 | 2.461 | 504 | 0.420 | 29997 | 66.60 |
|     | 10  | 200 | 2.463 | 503 | 0.390 | 29741 | 66.14 |
|     | 15  | 160 | 2.437 | 509 | 0.449 | 31583 | 68.79 |
|     | 15  | 165 | 2.439 | 509 | 0.463 | 31333 | 68.32 |
|     | 15  | 170 | 2.442 | 508 | 0.473 | 30939 | 67.63 |
|     | 15  | 175 | 2.445 | 507 | 0.475 | 30608 | 67.08 |
|     | 15  | 180 | 2.446 | 507 | 0.468 | 30488 | 66.90 |
|     | 15  | 185 | 2.450 | 506 | 0.456 | 30134 | 66.33 |
|     | 15  | 190 | 2.453 | 505 | 0.435 | 29900 | 65.98 |
|     | 15  | 195 | 2.456 | 505 | 0.408 | 29657 | 65.61 |
|     | 15  | 200 | 2.455 | 505 | 0.373 | 29523 | 65.26 |
|     | 20  | 160 | 2.424 | 512 | 0.458 | 31766 | 68.45 |
|     | 20  | 165 | 2.428 | 511 | 0.472 | 31237 | 67.52 |
|     | 20  | 170 | 2.431 | 510 | 0.478 | 30824 | 66.81 |
|     | 20  | 175 | 2.434 | 510 | 0.475 | 30610 | 66.47 |
|     | 20  | 180 | 2.436 | 509 | 0.464 | 30370 | 66.09 |
|     | 20  | 185 | 2.440 | 508 | 0.449 | 30021 | 65.54 |
|     | 20  | 190 | 2.443 | 508 | 0.425 | 29809 | 65.25 |
|     | 20  | 195 | 2.444 | 507 | 0.393 | 29635 | 64.92 |
|     | 20  | 200 | 2.440 | 508 | 0.355 | 29594 | 64.63 |
|     | 25  | 160 | 2.410 | 515 | 0.467 | 31771 | 67.64 |
|     | 25  | 165 | 2.414 | 514 | 0.478 | 31175 | 66.62 |
|     | 25  | 170 | 2.417 | 513 | 0.480 | 30847 | 66.07 |
|     | 25  | 175 | 2.419 | 513 | 0.472 | 30641 | 65.75 |
|     | 25  | 180 | 2.423 | 512 | 0.460 | 30297 | 65.20 |
|     | 25  | 185 | 2.426 | 511 | 0.439 | 30051 | 64.85 |
|     | 25  | 190 | 2.428 | 511 | 0.412 | 29872 | 64.58 |
|     | 25  | 195 | 2.425 | 511 | 0.376 | 29907 | 64.50 |
|     | 25  | 200 | 2.420 | 513 | 0.336 | 29904 | 64.19 |
|     | 30  | 160 | 2.394 | 518 | 0.475 | 31555 | 66.33 |
|     | 30  | 165 | 2.397 | 517 | 0.482 | 31149 | 65.63 |
|     | 30  | 170 | 2.399 | 517 | 0.478 | 30928 | 65.27 |
|     | 30  | 175 | 2.401 | 516 | 0.469 | 30694 | 64.89 |
|     | 30  | 180 | 2.404 | 516 | 0.452 | 30421 | 64.49 |
|     | 30  | 185 | 2.407 | 515 | 0.428 | 30279 | 64.31 |
|     | 30  | 190 | 2.406 | 515 | 0.396 | 30282 | 64.25 |
|     | 30  | 195 | 2.398 | 517 | 0.357 | 30540 | 64.40 |
|     | 30  | 200 | 2.391 | 519 | 0.314 | 30540 | 64.04 |
| 90° | -30 | 160 | 2.607 | 476 | 0.320 | 16778 | 41.80 |
|     | -30 | 165 | 2.605 | 476 | 0.356 | 16689 | 41.52 |
|     | -30 | 170 | 2.601 | 477 | 0.387 | 16577 | 41.13 |
|     | -30 | 175 | 2.596 | 478 | 0.413 | 16554 | 40.91 |
|     | -30 | 180 | 2.589 | 479 | 0.430 | 16649 | 40.92 |
|     | -30 | 185 | 2.585 | 480 | 0.444 | 16726 | 40.97 |
|     | -30 | 190 | 2.588 | 479 | 0.457 | 16625 | 40.82 |
|     | -30 | 195 | 2.588 | 479 | 0.461 | 16735 | 41.10 |

|     |     |       |     |       |       |       |
|-----|-----|-------|-----|-------|-------|-------|
| -30 | 200 | 2.586 | 479 | 0.456 | 16948 | 41.57 |
| -25 | 160 | 2.635 | 471 | 0.337 | 16251 | 41.37 |
| -25 | 165 | 2.631 | 471 | 0.370 | 16206 | 41.13 |
| -25 | 170 | 2.627 | 472 | 0.400 | 16154 | 40.87 |
| -25 | 175 | 2.619 | 473 | 0.421 | 16276 | 40.93 |
| -25 | 180 | 2.611 | 475 | 0.435 | 16455 | 41.14 |
| -25 | 185 | 2.611 | 475 | 0.450 | 16458 | 41.13 |
| -25 | 190 | 2.613 | 475 | 0.460 | 16448 | 41.17 |
| -25 | 195 | 2.610 | 475 | 0.456 | 16704 | 41.71 |
| -25 | 200 | 2.612 | 475 | 0.452 | 16715 | 41.81 |
| -20 | 160 | 2.654 | 467 | 0.353 | 15964 | 41.24 |
| -20 | 165 | 2.650 | 468 | 0.385 | 15943 | 41.05 |
| -20 | 170 | 2.643 | 469 | 0.410 | 16016 | 41.03 |
| -20 | 175 | 2.634 | 471 | 0.426 | 16221 | 41.27 |
| -20 | 180 | 2.630 | 471 | 0.442 | 16323 | 41.40 |
| -20 | 185 | 2.632 | 471 | 0.455 | 16295 | 41.37 |
| -20 | 190 | 2.630 | 471 | 0.456 | 16432 | 41.69 |
| -20 | 195 | 2.630 | 471 | 0.453 | 16508 | 41.88 |
| -20 | 200 | 2.636 | 470 | 0.449 | 16385 | 41.74 |
| -15 | 160 | 2.668 | 465 | 0.369 | 15782 | 41.21 |
| -15 | 165 | 2.663 | 466 | 0.398 | 15795 | 41.08 |
| -15 | 170 | 2.655 | 467 | 0.418 | 15949 | 41.22 |
| -15 | 175 | 2.648 | 468 | 0.434 | 16116 | 41.43 |
| -15 | 180 | 2.648 | 468 | 0.449 | 16108 | 41.40 |
| -15 | 185 | 2.649 | 468 | 0.458 | 16105 | 41.44 |
| -15 | 190 | 2.648 | 468 | 0.456 | 16203 | 41.66 |
| -15 | 195 | 2.653 | 467 | 0.454 | 16078 | 41.48 |
| -15 | 200 | 2.657 | 467 | 0.446 | 16063 | 41.58 |
| -10 | 160 | 2.679 | 463 | 0.385 | 15626 | 41.13 |
| -10 | 165 | 2.673 | 464 | 0.411 | 15686 | 41.09 |
| -10 | 170 | 2.664 | 465 | 0.428 | 15876 | 41.31 |
| -10 | 175 | 2.661 | 466 | 0.445 | 15904 | 41.31 |
| -10 | 180 | 2.662 | 466 | 0.457 | 15879 | 41.26 |
| -10 | 185 | 2.662 | 466 | 0.460 | 15914 | 41.36 |
| -10 | 190 | 2.665 | 465 | 0.458 | 15874 | 41.33 |
| -10 | 195 | 2.669 | 465 | 0.453 | 15764 | 41.18 |
| -10 | 200 | 2.663 | 466 | 0.430 | 16143 | 41.97 |
| -5  | 160 | 2.685 | 462 | 0.400 | 15556 | 41.11 |
| -5  | 165 | 2.676 | 463 | 0.421 | 15685 | 41.20 |
| -5  | 170 | 2.671 | 464 | 0.438 | 15789 | 41.30 |
| -5  | 175 | 2.669 | 465 | 0.452 | 15776 | 41.22 |
| -5  | 180 | 2.669 | 465 | 0.458 | 15800 | 41.28 |
| -5  | 185 | 2.671 | 464 | 0.459 | 15698 | 41.05 |
| -5  | 190 | 2.674 | 464 | 0.454 | 15693 | 41.13 |
| -5  | 195 | 2.676 | 463 | 0.443 | 15716 | 41.27 |
| -5  | 200 | 2.681 | 463 | 0.425 | 15742 | 41.48 |
| 0   | 160 | 2.683 | 462 | 0.412 | 15633 | 41.26 |
| 0   | 165 | 2.682 | 462 | 0.436 | 15543 | 41.00 |
| 0   | 170 | 2.678 | 463 | 0.450 | 15544 | 40.88 |
| 0   | 175 | 2.676 | 463 | 0.459 | 15552 | 40.84 |
| 0   | 180 | 2.674 | 464 | 0.460 | 15656 | 41.04 |
| 0   | 185 | 2.675 | 464 | 0.455 | 15651 | 41.05 |
| 0   | 190 | 2.677 | 463 | 0.446 | 15606 | 41.02 |
| 0   | 195 | 2.681 | 462 | 0.432 | 15594 | 41.11 |
| 0   | 200 | 2.686 | 462 | 0.412 | 15598 | 41.27 |
| 5   | 160 | 2.682 | 462 | 0.428 | 15649 | 41.27 |
| 5   | 165 | 2.669 | 465 | 0.437 | 15900 | 41.54 |
| 5   | 170 | 2.669 | 465 | 0.449 | 15816 | 41.30 |
| 5   | 175 | 2.670 | 464 | 0.456 | 15722 | 41.08 |
| 5   | 180 | 2.672 | 464 | 0.458 | 15597 | 40.84 |
| 5   | 185 | 2.676 | 463 | 0.452 | 15524 | 40.76 |
| 5   | 190 | 2.679 | 463 | 0.440 | 15489 | 40.76 |
| 5   | 195 | 2.676 | 463 | 0.420 | 15733 | 41.32 |
| 5   | 200 | 2.688 | 461 | 0.401 | 15502 | 41.08 |
| 10  | 160 | 2.664 | 465 | 0.430 | 16056 | 41.79 |

|      |     |     |       |     |       |       |       |
|------|-----|-----|-------|-----|-------|-------|-------|
|      | 10  | 165 | 2.662 | 466 | 0.446 | 15965 | 41.50 |
|      | 10  | 170 | 2.664 | 465 | 0.456 | 15786 | 41.08 |
|      | 10  | 175 | 2.667 | 465 | 0.461 | 15607 | 40.69 |
|      | 10  | 180 | 2.671 | 464 | 0.460 | 15465 | 40.44 |
|      | 10  | 185 | 2.673 | 464 | 0.450 | 15462 | 40.50 |
|      | 10  | 190 | 2.677 | 463 | 0.436 | 15378 | 40.42 |
|      | 10  | 195 | 2.681 | 462 | 0.415 | 15419 | 40.65 |
|      | 10  | 200 | 2.685 | 462 | 0.388 | 15477 | 40.92 |
|      | 15  | 160 | 2.652 | 468 | 0.441 | 16187 | 41.75 |
|      | 15  | 165 | 2.653 | 467 | 0.454 | 15972 | 41.22 |
|      | 15  | 170 | 2.656 | 467 | 0.463 | 15701 | 40.62 |
|      | 15  | 175 | 2.660 | 466 | 0.466 | 15481 | 40.17 |
|      | 15  | 180 | 2.663 | 466 | 0.459 | 15453 | 40.17 |
|      | 15  | 185 | 2.666 | 465 | 0.447 | 15379 | 40.08 |
|      | 15  | 190 | 2.670 | 464 | 0.428 | 15373 | 40.18 |
|      | 15  | 195 | 2.674 | 464 | 0.404 | 15437 | 40.48 |
|      | 15  | 200 | 2.676 | 463 | 0.372 | 15590 | 40.92 |
|      | 20  | 160 | 2.637 | 470 | 0.449 | 16258 | 41.46 |
|      | 20  | 165 | 2.641 | 470 | 0.462 | 15911 | 40.68 |
|      | 20  | 170 | 2.645 | 469 | 0.468 | 15631 | 40.08 |
|      | 20  | 175 | 2.648 | 468 | 0.466 | 15508 | 39.86 |
|      | 20  | 180 | 2.650 | 468 | 0.455 | 15487 | 39.87 |
|      | 20  | 185 | 2.654 | 467 | 0.441 | 15402 | 39.77 |
|      | 20  | 190 | 2.657 | 467 | 0.418 | 15487 | 40.09 |
|      | 20  | 195 | 2.660 | 466 | 0.390 | 15591 | 40.46 |
|      | 20  | 200 | 2.660 | 466 | 0.355 | 15791 | 40.98 |
|      | 25  | 160 | 2.620 | 473 | 0.456 | 16263 | 40.92 |
|      | 25  | 165 | 2.624 | 473 | 0.467 | 15868 | 40.07 |
|      | 25  | 170 | 2.628 | 472 | 0.470 | 15658 | 39.64 |
|      | 25  | 175 | 2.629 | 472 | 0.463 | 15630 | 39.62 |
|      | 25  | 180 | 2.632 | 471 | 0.451 | 15570 | 39.55 |
|      | 25  | 185 | 2.635 | 471 | 0.431 | 15624 | 39.78 |
|      | 25  | 190 | 2.638 | 470 | 0.406 | 15744 | 40.18 |
|      | 25  | 195 | 2.639 | 470 | 0.374 | 15965 | 40.76 |
|      | 25  | 200 | 2.636 | 470 | 0.337 | 16214 | 41.33 |
|      | 30  | 160 | 2.599 | 477 | 0.463 | 16246 | 40.23 |
|      | 30  | 165 | 2.602 | 477 | 0.470 | 15977 | 39.65 |
|      | 30  | 170 | 2.603 | 476 | 0.467 | 15913 | 39.53 |
|      | 30  | 175 | 2.604 | 476 | 0.457 | 15907 | 39.56 |
|      | 30  | 180 | 2.606 | 476 | 0.441 | 15924 | 39.67 |
|      | 30  | 185 | 2.609 | 475 | 0.419 | 16061 | 40.08 |
|      | 30  | 190 | 2.610 | 475 | 0.391 | 16257 | 40.61 |
|      | 30  | 195 | 2.607 | 476 | 0.355 | 16616 | 41.40 |
|      | 30  | 200 | 2.603 | 476 | 0.317 | 16897 | 41.98 |
| 180° | -30 | 160 | 2.387 | 519 | 0.314 | 30663 | 64.07 |
|      | -30 | 165 | 2.388 | 519 | 0.352 | 31072 | 64.97 |
|      | -30 | 170 | 2.387 | 519 | 0.387 | 31380 | 65.57 |
|      | -30 | 175 | 2.383 | 520 | 0.414 | 31780 | 66.15 |
|      | -30 | 180 | 2.375 | 522 | 0.432 | 32271 | 66.76 |
|      | -30 | 185 | 2.373 | 523 | 0.449 | 32559 | 67.23 |
|      | -30 | 190 | 2.375 | 522 | 0.463 | 32667 | 67.57 |
|      | -30 | 195 | 2.373 | 523 | 0.465 | 33125 | 68.39 |
|      | -30 | 200 | 2.373 | 523 | 0.464 | 33345 | 68.83 |
|      | -25 | 160 | 2.408 | 515 | 0.330 | 30444 | 64.73 |
|      | -25 | 165 | 2.408 | 515 | 0.366 | 30871 | 65.63 |
|      | -25 | 170 | 2.405 | 516 | 0.398 | 31251 | 66.30 |
|      | -25 | 175 | 2.398 | 517 | 0.420 | 31786 | 67.04 |
|      | -25 | 180 | 2.393 | 518 | 0.437 | 32263 | 67.73 |
|      | -25 | 185 | 2.394 | 518 | 0.455 | 32444 | 68.17 |
|      | -25 | 190 | 2.393 | 518 | 0.462 | 32774 | 68.82 |
|      | -25 | 195 | 2.391 | 519 | 0.461 | 33153 | 69.48 |
|      | -25 | 200 | 2.394 | 518 | 0.460 | 33086 | 69.53 |
|      | -20 | 160 | 2.423 | 512 | 0.345 | 30512 | 65.68 |
|      | -20 | 165 | 2.422 | 512 | 0.380 | 30944 | 66.54 |

|     |     |       |     |       |       |       |
|-----|-----|-------|-----|-------|-------|-------|
| -20 | 170 | 2.416 | 513 | 0.406 | 31466 | 67.35 |
| -20 | 175 | 2.409 | 515 | 0.425 | 32057 | 68.20 |
| -20 | 180 | 2.408 | 515 | 0.444 | 32343 | 68.75 |
| -20 | 185 | 2.409 | 515 | 0.458 | 32537 | 69.22 |
| -20 | 190 | 2.406 | 515 | 0.458 | 32960 | 69.95 |
| -20 | 195 | 2.408 | 515 | 0.459 | 32935 | 70.03 |
| -20 | 200 | 2.410 | 514 | 0.452 | 32928 | 70.13 |
| -15 | 160 | 2.433 | 510 | 0.362 | 30743 | 66.73 |
| -15 | 165 | 2.430 | 510 | 0.393 | 31192 | 67.54 |
| -15 | 170 | 2.423 | 512 | 0.414 | 31787 | 68.43 |
| -15 | 175 | 2.420 | 512 | 0.434 | 32134 | 69.03 |
| -15 | 180 | 2.422 | 512 | 0.451 | 32293 | 69.43 |
| -15 | 185 | 2.421 | 512 | 0.457 | 32573 | 69.99 |
| -15 | 190 | 2.422 | 512 | 0.458 | 32625 | 70.17 |
| -15 | 195 | 2.426 | 511 | 0.457 | 32430 | 69.97 |
| -15 | 200 | 2.428 | 511 | 0.446 | 32464 | 70.16 |
| -10 | 160 | 2.443 | 508 | 0.379 | 30828 | 67.46 |
| -10 | 165 | 2.438 | 509 | 0.404 | 31311 | 68.25 |
| -10 | 170 | 2.434 | 509 | 0.426 | 31742 | 68.96 |
| -10 | 175 | 2.434 | 509 | 0.445 | 31888 | 69.29 |
| -10 | 180 | 2.435 | 509 | 0.456 | 32070 | 69.71 |
| -10 | 185 | 2.435 | 509 | 0.460 | 32201 | 70.00 |
| -10 | 190 | 2.438 | 509 | 0.460 | 32049 | 69.85 |
| -10 | 195 | 2.440 | 508 | 0.453 | 31972 | 69.80 |
| -10 | 200 | 2.442 | 508 | 0.438 | 31954 | 69.89 |
| -5  | 160 | 2.449 | 506 | 0.394 | 30945 | 68.07 |
| -5  | 165 | 2.443 | 508 | 0.416 | 31478 | 68.90 |
| -5  | 170 | 2.442 | 508 | 0.437 | 31712 | 69.33 |
| -5  | 175 | 2.442 | 508 | 0.452 | 31832 | 69.61 |
| -5  | 180 | 2.442 | 508 | 0.459 | 31968 | 69.89 |
| -5  | 185 | 2.444 | 507 | 0.461 | 31882 | 69.83 |
| -5  | 190 | 2.446 | 507 | 0.457 | 31735 | 69.63 |
| -5  | 195 | 2.447 | 507 | 0.444 | 31760 | 69.72 |
| -5  | 200 | 2.450 | 506 | 0.426 | 31614 | 69.56 |
| 0   | 160 | 2.448 | 507 | 0.406 | 31363 | 68.91 |
| 0   | 165 | 2.445 | 507 | 0.428 | 31705 | 69.47 |
| 0   | 170 | 2.444 | 507 | 0.446 | 31779 | 69.62 |
| 0   | 175 | 2.442 | 508 | 0.456 | 32024 | 70.04 |
| 0   | 180 | 2.440 | 508 | 0.459 | 32198 | 70.28 |
| 0   | 185 | 2.440 | 508 | 0.455 | 32189 | 70.26 |
| 0   | 190 | 2.440 | 508 | 0.445 | 32109 | 70.08 |
| 0   | 195 | 2.449 | 506 | 0.432 | 31552 | 69.40 |
| 0   | 200 | 2.452 | 506 | 0.410 | 31324 | 69.07 |
| 5   | 160 | 2.443 | 508 | 0.418 | 31810 | 69.60 |
| 5   | 165 | 2.441 | 508 | 0.437 | 31966 | 69.83 |
| 5   | 170 | 2.441 | 508 | 0.454 | 32127 | 70.17 |
| 5   | 175 | 2.437 | 509 | 0.458 | 32387 | 70.54 |
| 5   | 180 | 2.444 | 507 | 0.460 | 31755 | 69.54 |
| 5   | 185 | 2.445 | 507 | 0.453 | 31669 | 69.39 |
| 5   | 190 | 2.447 | 507 | 0.440 | 31493 | 69.13 |
| 5   | 195 | 2.450 | 506 | 0.421 | 31283 | 68.83 |
| 5   | 200 | 2.451 | 506 | 0.394 | 31083 | 68.48 |
| 10  | 160 | 2.435 | 509 | 0.433 | 32371 | 70.40 |
| 10  | 165 | 2.435 | 509 | 0.445 | 32185 | 69.96 |
| 10  | 170 | 2.436 | 509 | 0.457 | 32045 | 69.72 |
| 10  | 175 | 2.438 | 509 | 0.462 | 31847 | 69.41 |
| 10  | 180 | 2.439 | 508 | 0.459 | 31738 | 69.25 |
| 10  | 185 | 2.441 | 508 | 0.449 | 31566 | 68.97 |
| 10  | 190 | 2.444 | 507 | 0.433 | 31319 | 68.61 |
| 10  | 195 | 2.447 | 507 | 0.411 | 31087 | 68.27 |
| 10  | 200 | 2.447 | 507 | 0.379 | 30922 | 67.89 |
| 15  | 160 | 2.424 | 512 | 0.438 | 32621 | 70.27 |
| 15  | 165 | 2.426 | 511 | 0.453 | 32394 | 69.88 |
| 15  | 170 | 2.428 | 511 | 0.463 | 32108 | 69.42 |
| 15  | 175 | 2.431 | 510 | 0.464 | 31890 | 69.08 |



|      |     |     |       |     |       |       |       |
|------|-----|-----|-------|-----|-------|-------|-------|
|      | 15  | 180 | 2.432 | 510 | 0.457 | 31767 | 68.87 |
|      | 15  | 185 | 2.436 | 509 | 0.445 | 31392 | 68.30 |
|      | 15  | 190 | 2.440 | 508 | 0.426 | 31124 | 67.93 |
|      | 15  | 195 | 2.442 | 508 | 0.398 | 30893 | 67.53 |
|      | 15  | 200 | 2.440 | 508 | 0.363 | 30732 | 67.07 |
|      | 20  | 160 | 2.410 | 514 | 0.447 | 32945 | 70.17 |
|      | 20  | 165 | 2.414 | 514 | 0.460 | 32527 | 69.48 |
|      | 20  | 170 | 2.417 | 513 | 0.466 | 32196 | 68.95 |
|      | 20  | 175 | 2.419 | 513 | 0.462 | 32004 | 68.65 |
|      | 20  | 180 | 2.423 | 512 | 0.455 | 31615 | 68.05 |
|      | 20  | 185 | 2.428 | 511 | 0.439 | 31247 | 67.54 |
|      | 20  | 190 | 2.431 | 510 | 0.415 | 30999 | 67.17 |
|      | 20  | 195 | 2.430 | 510 | 0.383 | 30893 | 66.88 |
|      | 20  | 200 | 2.426 | 511 | 0.346 | 30751 | 66.37 |
|      | 25  | 160 | 2.396 | 518 | 0.455 | 33012 | 69.49 |
|      | 25  | 165 | 2.400 | 517 | 0.465 | 32587 | 68.80 |
|      | 25  | 170 | 2.403 | 516 | 0.467 | 32276 | 68.32 |
|      | 25  | 175 | 2.406 | 515 | 0.461 | 31962 | 67.83 |
|      | 25  | 180 | 2.412 | 514 | 0.450 | 31500 | 67.17 |
|      | 25  | 185 | 2.416 | 513 | 0.431 | 31228 | 66.81 |
|      | 25  | 190 | 2.417 | 513 | 0.403 | 31034 | 66.47 |
|      | 25  | 195 | 2.412 | 514 | 0.367 | 31082 | 66.32 |
|      | 25  | 200 | 2.407 | 515 | 0.327 | 30989 | 65.83 |
|      | 30  | 160 | 2.380 | 521 | 0.463 | 32947 | 68.45 |
|      | 30  | 165 | 2.384 | 520 | 0.469 | 32548 | 67.83 |
|      | 30  | 170 | 2.387 | 519 | 0.467 | 32229 | 67.34 |
|      | 30  | 175 | 2.392 | 518 | 0.459 | 31798 | 66.72 |
|      | 30  | 180 | 2.397 | 517 | 0.445 | 31444 | 66.26 |
|      | 30  | 185 | 2.399 | 517 | 0.420 | 31266 | 66.00 |
|      | 30  | 190 | 2.396 | 518 | 0.387 | 31360 | 65.99 |
|      | 30  | 195 | 2.389 | 519 | 0.349 | 31545 | 66.00 |
|      | 30  | 200 | 2.384 | 520 | 0.308 | 31376 | 65.38 |
| 270° | -30 | 160 | 2.617 | 474 | 0.343 | 17714 | 44.49 |
|      | -30 | 165 | 2.615 | 474 | 0.382 | 17618 | 44.17 |
|      | -30 | 170 | 2.611 | 475 | 0.416 | 17491 | 43.72 |
|      | -30 | 175 | 2.606 | 476 | 0.443 | 17454 | 43.46 |
|      | -30 | 180 | 2.600 | 477 | 0.463 | 17496 | 43.36 |
|      | -30 | 185 | 2.596 | 478 | 0.478 | 17534 | 43.33 |
|      | -30 | 190 | 2.598 | 477 | 0.491 | 17438 | 43.17 |
|      | -30 | 195 | 2.598 | 477 | 0.494 | 17570 | 43.48 |
|      | -30 | 200 | 2.596 | 478 | 0.488 | 17805 | 44.01 |
|      | -25 | 160 | 2.645 | 469 | 0.362 | 17198 | 44.12 |
|      | -25 | 165 | 2.641 | 470 | 0.398 | 17139 | 43.83 |
|      | -25 | 170 | 2.636 | 470 | 0.430 | 17077 | 43.52 |
|      | -25 | 175 | 2.629 | 472 | 0.453 | 17174 | 43.53 |
|      | -25 | 180 | 2.622 | 473 | 0.468 | 17335 | 43.69 |
|      | -25 | 185 | 2.621 | 473 | 0.484 | 17324 | 43.65 |
|      | -25 | 190 | 2.623 | 473 | 0.493 | 17312 | 43.66 |
|      | -25 | 195 | 2.620 | 473 | 0.488 | 17572 | 44.22 |
|      | -25 | 200 | 2.621 | 473 | 0.484 | 17598 | 44.34 |
|      | -20 | 160 | 2.665 | 465 | 0.380 | 16900 | 44.01 |
|      | -20 | 165 | 2.660 | 466 | 0.414 | 16865 | 43.77 |
|      | -20 | 170 | 2.654 | 467 | 0.441 | 16913 | 43.68 |
|      | -20 | 175 | 2.645 | 469 | 0.459 | 17091 | 43.85 |
|      | -20 | 180 | 2.641 | 470 | 0.475 | 17202 | 43.98 |
|      | -20 | 185 | 2.643 | 469 | 0.489 | 17132 | 43.87 |
|      | -20 | 190 | 2.641 | 470 | 0.490 | 17278 | 44.19 |
|      | -20 | 195 | 2.641 | 470 | 0.485 | 17373 | 44.42 |
|      | -20 | 200 | 2.646 | 469 | 0.482 | 17228 | 44.23 |
|      | -15 | 160 | 2.680 | 463 | 0.397 | 16670 | 43.90 |
|      | -15 | 165 | 2.675 | 464 | 0.430 | 16646 | 43.68 |
|      | -15 | 170 | 2.667 | 465 | 0.451 | 16789 | 43.78 |
|      | -15 | 175 | 2.659 | 466 | 0.467 | 16980 | 44.02 |
|      | -15 | 180 | 2.659 | 466 | 0.484 | 16941 | 43.92 |

|     |     |       |     |       |       |       |
|-----|-----|-------|-----|-------|-------|-------|
| -15 | 185 | 2.660 | 466 | 0.493 | 16928 | 43.92 |
| -15 | 190 | 2.658 | 466 | 0.489 | 17078 | 44.25 |
| -15 | 195 | 2.662 | 466 | 0.487 | 16951 | 44.06 |
| -15 | 200 | 2.667 | 465 | 0.478 | 16908 | 44.09 |
| -10 | 160 | 2.690 | 461 | 0.415 | 16522 | 43.85 |
| -10 | 165 | 2.684 | 462 | 0.442 | 16582 | 43.78 |
| -10 | 170 | 2.675 | 464 | 0.460 | 16775 | 44.00 |
| -10 | 175 | 2.671 | 464 | 0.477 | 16829 | 44.03 |
| -10 | 180 | 2.673 | 464 | 0.491 | 16756 | 43.88 |
| -10 | 185 | 2.671 | 464 | 0.492 | 16853 | 44.10 |
| -10 | 190 | 2.673 | 464 | 0.489 | 16842 | 44.11 |
| -10 | 195 | 2.671 | 464 | 0.476 | 16906 | 44.23 |
| -10 | 200 | 2.680 | 463 | 0.468 | 16813 | 44.26 |
| -5  | 160 | 2.694 | 460 | 0.430 | 16539 | 44.00 |
| -5  | 165 | 2.685 | 462 | 0.451 | 16668 | 44.07 |
| -5  | 170 | 2.678 | 463 | 0.468 | 16838 | 44.28 |
| -5  | 175 | 2.678 | 463 | 0.484 | 16780 | 44.11 |
| -5  | 180 | 2.680 | 463 | 0.493 | 16606 | 43.72 |
| -5  | 185 | 2.678 | 463 | 0.491 | 16677 | 43.86 |
| -5  | 190 | 2.681 | 463 | 0.485 | 16724 | 44.06 |
| -5  | 195 | 2.683 | 462 | 0.473 | 16734 | 44.17 |
| -5  | 200 | 2.687 | 461 | 0.454 | 16757 | 44.37 |
| 0   | 160 | 2.691 | 461 | 0.440 | 16673 | 44.26 |
| 0   | 165 | 2.690 | 461 | 0.467 | 16580 | 43.98 |
| 0   | 170 | 2.678 | 463 | 0.474 | 16891 | 44.42 |
| 0   | 175 | 2.684 | 462 | 0.492 | 16551 | 43.72 |
| 0   | 180 | 2.683 | 462 | 0.494 | 16598 | 43.80 |
| 0   | 185 | 2.682 | 462 | 0.486 | 16670 | 43.97 |
| 0   | 190 | 2.684 | 462 | 0.477 | 16621 | 43.92 |
| 0   | 195 | 2.689 | 461 | 0.462 | 16582 | 43.95 |
| 0   | 200 | 2.693 | 460 | 0.441 | 16579 | 44.10 |
| 5   | 160 | 2.690 | 461 | 0.459 | 16659 | 44.21 |
| 5   | 165 | 2.678 | 463 | 0.468 | 16910 | 44.47 |
| 5   | 170 | 2.678 | 463 | 0.482 | 16774 | 44.11 |
| 5   | 175 | 2.679 | 463 | 0.489 | 16692 | 43.91 |
| 5   | 180 | 2.681 | 462 | 0.490 | 16556 | 43.64 |
| 5   | 185 | 2.684 | 462 | 0.485 | 16477 | 43.53 |
| 5   | 190 | 2.687 | 461 | 0.473 | 16408 | 43.45 |
| 5   | 195 | 2.692 | 461 | 0.455 | 16366 | 43.50 |
| 5   | 200 | 2.697 | 460 | 0.430 | 16373 | 43.68 |
| 10  | 160 | 2.676 | 463 | 0.462 | 16911 | 44.42 |
| 10  | 165 | 2.674 | 464 | 0.479 | 16835 | 44.14 |
| 10  | 170 | 2.675 | 464 | 0.490 | 16663 | 43.72 |
| 10  | 175 | 2.677 | 463 | 0.496 | 16488 | 43.32 |
| 10  | 180 | 2.680 | 463 | 0.494 | 16350 | 43.06 |
| 10  | 185 | 2.682 | 462 | 0.483 | 16347 | 43.10 |
| 10  | 190 | 2.686 | 462 | 0.468 | 16249 | 42.99 |
| 10  | 195 | 2.690 | 461 | 0.445 | 16284 | 43.21 |
| 10  | 200 | 2.695 | 460 | 0.416 | 16315 | 43.44 |
| 15  | 160 | 2.665 | 465 | 0.474 | 17012 | 44.31 |
| 15  | 165 | 2.665 | 465 | 0.488 | 16816 | 43.79 |
| 15  | 170 | 2.667 | 465 | 0.497 | 16566 | 43.20 |
| 15  | 175 | 2.670 | 464 | 0.500 | 16343 | 42.72 |
| 15  | 180 | 2.672 | 464 | 0.492 | 16331 | 42.74 |
| 15  | 185 | 2.674 | 464 | 0.478 | 16251 | 42.62 |
| 15  | 190 | 2.678 | 463 | 0.459 | 16241 | 42.72 |
| 15  | 195 | 2.683 | 462 | 0.432 | 16294 | 43.00 |
| 15  | 200 | 2.685 | 462 | 0.398 | 16428 | 43.42 |
| 20  | 160 | 2.650 | 468 | 0.483 | 17085 | 43.99 |
| 20  | 165 | 2.652 | 468 | 0.496 | 16767 | 43.23 |
| 20  | 170 | 2.655 | 467 | 0.502 | 16471 | 42.57 |
| 20  | 175 | 2.657 | 467 | 0.499 | 16352 | 42.33 |
| 20  | 180 | 2.659 | 466 | 0.487 | 16328 | 42.32 |
| 20  | 185 | 2.663 | 466 | 0.472 | 16237 | 42.21 |
| 20  | 190 | 2.666 | 465 | 0.448 | 16322 | 42.54 |

---

|    |     |       |     |       |       |       |
|----|-----|-------|-----|-------|-------|-------|
| 20 | 195 | 2.670 | 464 | 0.417 | 16409 | 42.88 |
| 20 | 200 | 2.670 | 464 | 0.380 | 16603 | 43.41 |
| 25 | 160 | 2.631 | 471 | 0.490 | 17135 | 43.49 |
| 25 | 165 | 2.635 | 471 | 0.502 | 16716 | 42.55 |
| 25 | 170 | 2.637 | 470 | 0.504 | 16485 | 42.05 |
| 25 | 175 | 2.639 | 470 | 0.495 | 16454 | 42.01 |
| 25 | 180 | 2.641 | 470 | 0.482 | 16394 | 41.93 |
| 25 | 185 | 2.644 | 469 | 0.461 | 16432 | 42.13 |
| 25 | 190 | 2.648 | 468 | 0.435 | 16529 | 42.50 |
| 25 | 195 | 2.650 | 468 | 0.401 | 16708 | 43.02 |
| 25 | 200 | 2.649 | 468 | 0.361 | 16953 | 43.61 |
| 30 | 160 | 2.609 | 475 | 0.496 | 17147 | 42.78 |
| 30 | 165 | 2.611 | 475 | 0.503 | 16841 | 42.10 |
| 30 | 170 | 2.612 | 475 | 0.500 | 16748 | 41.91 |
| 30 | 175 | 2.613 | 474 | 0.488 | 16742 | 41.92 |
| 30 | 180 | 2.616 | 474 | 0.472 | 16744 | 42.00 |
| 30 | 185 | 2.619 | 474 | 0.448 | 16848 | 42.37 |
| 30 | 190 | 2.621 | 473 | 0.418 | 17015 | 42.87 |
| 30 | 195 | 2.620 | 473 | 0.380 | 17332 | 43.62 |
| 30 | 200 | 2.617 | 474 | 0.339 | 17599 | 44.20 |

---

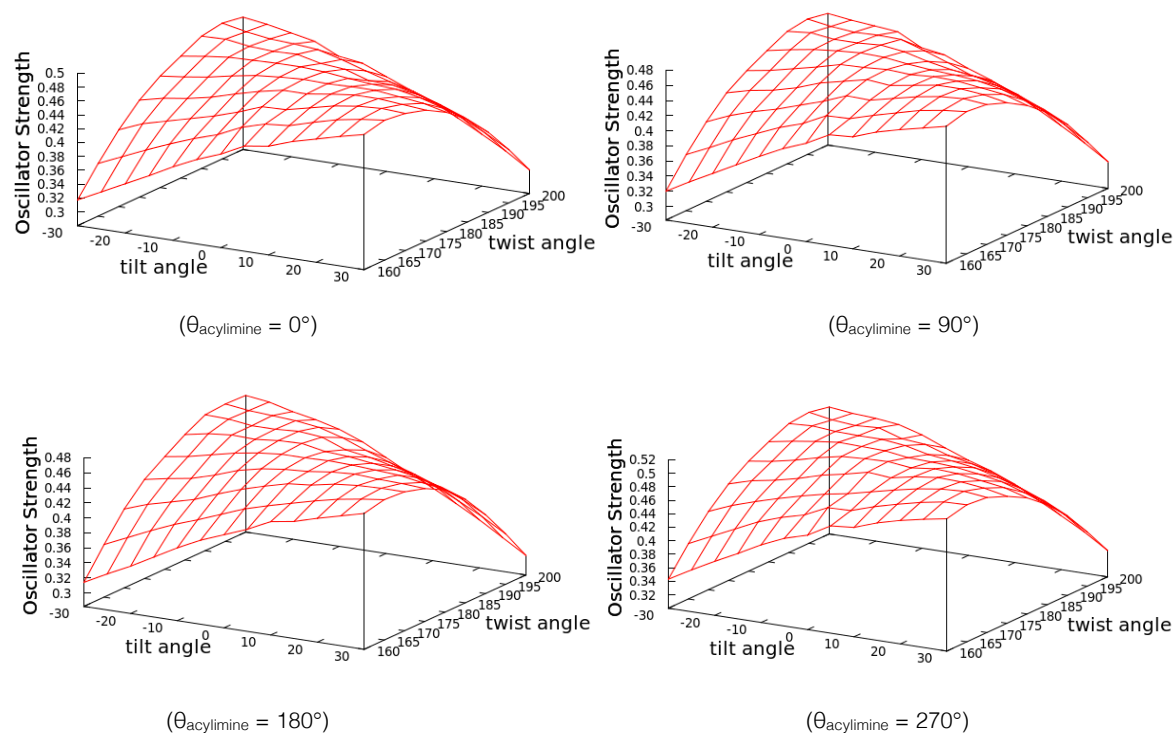

**Fig. S5** Variation of OPA oscillator strengths with tilt and twist angles (see Figure 1 in the main text) for Model 21 at fixed  $\theta_{acylimine}$  of  $0^\circ$ ,  $90^\circ$ ,  $180^\circ$  and  $270^\circ$ . The OPA values are for the transition to  $S_1$  as determined at the B3LYP/6-31G+(d,p) level of theory and PCM with parameters for  $H_2O$ .

---

## References

- 1 M. A. Salem and A. Brown, *Phys. Chem. Chem. Phys.*, 2015, **17**, 25563–25571.
